# Supplementary material for: Synthesis of spiropyrans via Ru(ii)-catalyzed coupling of 3-aryl-2H-benzo[b][1,4]oxazines with benzoquinones
Source: Royal Society of Chemistry journal article supplement (doi:10.1039/d3ob01971c), 2023-12-26

*Supporting Information*

**Synthesis of Spiropyrans via Ru(II)-Catalyzed Coupling of 3-aryl-2*H*-benzo[*b*][1,4]oxazines with Benzoquinones**

Mengke Wen,<sup>‡,a,b</sup> Mengying Zhang,<sup>‡,a</sup> Fan Gu,<sup>a</sup> Yuehua Geng,<sup>a</sup> Xiangyang Liu,<sup>a</sup> Qingnan Wu,<sup>\*,a</sup> and Xifa Yang,<sup>\*,a</sup>

<sup>a</sup> *College of Plant Protection, Henan Agricultural University, Zhengzhou, 450002, China*

<sup>b</sup> *Center for Molecular Science and Engineering, College of Sciences, Northeastern University, Shenyang, 110819, China*

\* yangxifachem@163.com

Contents

|                                     |            |
|-------------------------------------|------------|
| <b>A. General information</b> ..... | <b>S2</b>  |
| <b>B. Catalytic results</b> .....   | <b>S2</b>  |
| <b>C. Scale-up Reaction</b> .....   | <b>S24</b> |
| <b>D. Mechanistic studies</b> ..... | <b>S25</b> |
| <b>E. Crystal structure</b> .....   | <b>S27</b> |
| <b>F.NMR spectra</b> .....          | <b>S31</b> |

## General information:

Unless otherwise noted, all the reactions were carried out in an nitrogen-filled glove box. Anhydrous solvents were purified and dried by standard procedures. All chemicals were obtained from commercial sources and were used as received unless otherwise noted. Benzoxazines,<sup>1</sup> benzoquinone compounds<sup>2</sup>, N-sulfonyl quinone monoimine<sup>3</sup> were prepared by following literature reports. <sup>1</sup>H and <sup>13</sup>C NMR spectra were recorded on a Bruker AV 400 spectrometer (400 MHz for <sup>1</sup>H, 101 MHz for <sup>13</sup>C). All coupling constants were reported in Hz. The residual solvent signals were used as references for <sup>1</sup>H and <sup>13</sup>C NMR spectra and the chemical shifts were converted to the TMS scale (CDCl<sub>3</sub>: δ <sup>1</sup>H = 7.26 ppm, δ <sup>13</sup>C = 77.16 ppm. DMSO-*d*<sub>6</sub>: δ <sup>1</sup>H = 2.50 ppm, δ <sup>13</sup>C = 39.52 ppm. CD<sub>3</sub>OD: δ <sup>1</sup>H = 3.31 ppm, δ <sup>13</sup>C = 49.00 ppm). HRMS data were obtained using a TOF mode. Column chromatography was performed on silica gel (200-300 mesh) using ethyl acetate (EA)/petroleum ether (PE)/dichloromethane (DCM). The data of CCDC 2302071, CCDC 2302201, CCDC 2302202 can be obtained free of of charge from The Cambridge Crystallographic Data Centre via [www.ccdc.cam.ac.uk/data\\_request/cif](http://www.ccdc.cam.ac.uk/data_request/cif).<sup>4</sup>

### A. Catalytic results:

#### (a) General Procedure for Synthesis of 3.

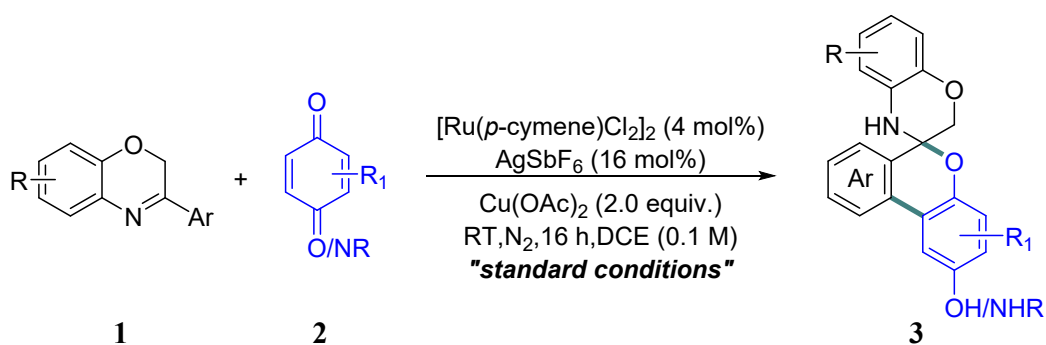

In a glovebox, Benzoxazines **1** (0.20 mmol, 1.0 equiv), benzoquinone compounds **2** (0.44 mmol, 2.2 equiv), [Ru(*p*-cymene)Cl<sub>2</sub>]<sub>2</sub> (4 mol%), AgSbF<sub>6</sub> (16 mol%), Cu(OAc)<sub>2</sub> (0.40 mmol, 2.0 equiv) and DCE (2.0 mL) were charged into a pressure tube. The reaction mixture was stirred at room temperature for 16 h. After the solvent was removed under reduced pressure, the residue was purified by silica gel chromatography using PE/EA (15:1) to afford the desired product **3**.

#### (b) Synthesis of Ruthenium complexes A.

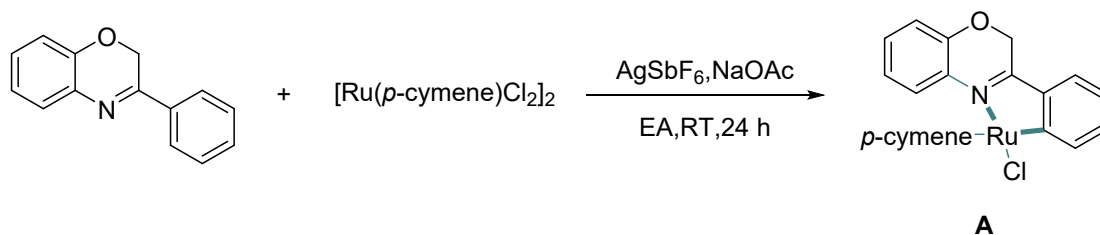

Benzoxazines **1a** (0.11 mmol), [Ru (*p*-cymene)Cl<sub>2</sub>]<sub>2</sub> (0.05 mmol) and NaOAc (0.44 mmol) were weighed into a Schlenk tube equipped with a stir bar. EA (2.0 mL) was added, and the mixture was stirred at room temperature for 24 h under N<sub>2</sub>. Afterwards, followed by filtration of any precipitate. The solvent was then removed and the brown product was purified by recrystallization using dichloromethane and diethyl ether to give product complex **A**. Yield of **A**: 10.2 mg (0.023 mmol, 23%).

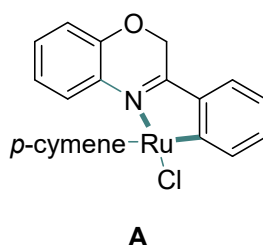

Brown solid 23% (10.2 mg).

**<sup>1</sup>H NMR** (400 MHz, CDCl<sub>3</sub>) δ 8.41 (dd, *J* = 7.8, 1.5 Hz, 1H), 8.26 (d, *J* = 7.5 Hz, 1H), 7.38 (d, *J* = 7.3 Hz, 1H), 7.25 – 7.18 (m, 2H), 7.16 (td, *J* = 7.7, 1.4 Hz, 1H), 7.04 (t, *J* = 7.2 Hz, 1H), 6.98 (dd, *J* = 7.8, 1.3 Hz, 1H), 5.50 (d, *J* = 5.7 Hz, 2H), 5.41 (d, *J* = 15.1 Hz, 1H), 5.14 (d, *J* = 6.0 Hz, 1H), 5.11 (d, *J* = 5.9 Hz, 1H), 4.80 (d, *J* = 15.1 Hz, 1H), 2.30 – 2.19 (m, 1H), 2.09 (s, 3H), 0.95 (d, *J* = 6.9 Hz, 3H), 0.86 (d, *J* = 6.9 Hz, 3H).

**<sup>13</sup>C NMR** (101 MHz, CDCl<sub>3</sub>) δ 191.5, 172.1, 148.0, 142.8, 139.9, 136.9, 130.8, 128.5, 127.0, 126.7, 122.7, 122.6, 115.9, 101.1, 99.9, 92.9, 89.6, 84.4, 83.8, 64.0, 31.0, 22.9, 21.7, 18.8.

**HRMS**: [M - Cl]<sup>+</sup> calculated for C<sub>24</sub>H<sub>24</sub>NORu<sup>+</sup>: 444.0896, found: 444.0905.

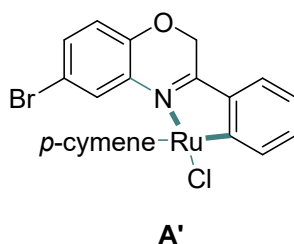

Brown solid 19% (10.6 mg).

**<sup>1</sup>H NMR** (400 MHz, CDCl<sub>3</sub>) δ 8.56 (d, *J* = 2.3 Hz, 1H), 8.26 (d, *J* = 7.6 Hz, 1H), 7.39 (d, *J* = 7.7 Hz, 1H), 7.32 (dd, *J* = 8.5, 2.4 Hz, 1H), 7.21 (td, *J* = 7.4, 1.2 Hz, 1H), 7.02 (t, *J* = 7.1 Hz, 1H), 6.86 (d, *J* = 8.5 Hz, 1H), 5.55 (t, *J* = 6.1 Hz, 2H), 5.42 (dd, *J* = 15.2, 2.9 Hz, 1H), 5.06 (d, *J* = 5.9 Hz, 1H), 5.02 (d, *J* = 5.9 Hz, 1H), 4.76 (d, *J* = 15.2 Hz, 1H), 2.37 – 2.26 (m, 1H), 2.14 (s, 3H), 1.00 (d, *J* = 6.9 Hz, 3H), 0.80 (d, *J* = 6.9 Hz, 3H).

**<sup>13</sup>C NMR** (101 MHz, CDCl<sub>3</sub>) δ 192.5, 172.5, 147.1, 142.5, 140.0, 137.9, 131.2, 131.0, 129.5, 127.5, 122.7, 117.5, 114.5, 102.2, 101.4, 94.1, 89.8, 83.4, 82.0, 64.1, 31.1, 23.3, 21.2, 18.8.

**HRMS:** [M + Na]<sup>+</sup> calculated for C<sub>24</sub>H<sub>23</sub>BrClNNaORu<sup>+</sup> : 579.9587, found: 579.9588.

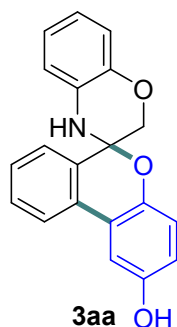

**2*H*,4*H*-spiro[benzo[*b*][1,4]oxazine-3,6'-benzo[*c*]chromen]-2'-ol (3aa)**

White solid 83% (52.7 mg), mp: 125 – 126 °C.

**<sup>1</sup>H NMR** (400 MHz, CDCl<sub>3</sub>) δ 7.73 (d, *J* = 7.8 Hz, 1H), 7.53 (dd, *J* = 7.6, 1.0 Hz, 1H), 7.51 – 7.46 (m, 1H), 7.42 – 7.38 (m, 1H), 7.24 (d, *J* = 2.9 Hz, 1H), 6.95 – 6.86 (m, 3H), 6.83 – 6.79 (m, 1H), 6.77 – 6.72 (m, 2H), 4.79 (s, 1H), 4.75 (s, 1H), 4.40 (dd, *J* = 11.3, 2.5 Hz, 1H), 3.87 (d, *J* = 11.3 Hz, 1H).

**<sup>13</sup>C NMR** (101 MHz, CD<sub>3</sub>OD) δ 153.5, 146.3, 144.4, 133.7, 133.4, 132.2, 130.6, 129.5, 126.5, 123.5, 123.4, 122.7, 120.0, 119.9, 117.8, 117.0, 116.6, 110.1, 84.8, 68.6.

**HRMS:** [M + H]<sup>+</sup> calculated for C<sub>20</sub>H<sub>16</sub>NO<sub>3</sub><sup>+</sup> : 318.1125, found: 318.1122.

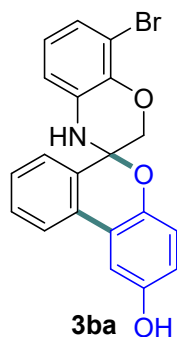

**8-bromo-2*H*,4*H*-spiro[benzo[*b*][1,4]oxazine-3,6'-benzo[*c*]chromen]-2'-ol (3ba)**

White solid 73% (57.8 mg), mp: 133 – 134 °C.

**<sup>1</sup>H NMR** (400 MHz, CDCl<sub>3</sub>) δ 7.62 (d, *J* = 7.8 Hz, 1H), 7.43 (t, *J* = 7.6 Hz, 2H), 7.35 (t, 1H), 7.16 (d, *J* = 2.6 Hz, 1H), 7.03 (d, *J* = 7.9 Hz, 1H), 6.85 (d, *J* = 8.6 Hz, 1H), 6.77 – 6.61 (m, 3H), 5.21 (s, 1H), 4.93 (s, 1H), 4.49 (dd, *J* = 11.3, 2.2 Hz, 1H), 3.87 (d, *J* = 11.4 Hz, 1H).

**<sup>13</sup>C NMR** (101 MHz, CDCl<sub>3</sub>) δ 150.8, 145.3, 140.3, 132.3, 131.4, 130.6, 130.1, 130.1, 128.8, 125.1, 123.8, 122.8, 122.6, 122.1, 119.6, 117.3, 115.0, 110.6, 109.5, 83.4, 68.2.

**HRMS:** [M + H]<sup>+</sup> calculated for C<sub>20</sub>H<sub>15</sub>BrNO<sub>3</sub><sup>+</sup>: 396.0230, found: 396.0222.

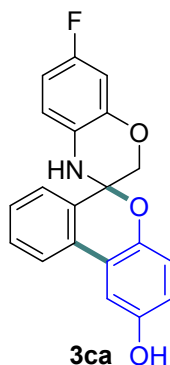

**7-fluoro-2H,4H-spiro[benzo[*b*][1,4]oxazine-3,6'-benzo[*c*]chromen]-2'-ol (3ca)**

White solid 69% (46.2 mg), mp: 207-208 °C.

**<sup>1</sup>H NMR** (400 MHz, CD<sub>3</sub>OD) δ 7.74 (d, *J* = 7.7 Hz, 1H), 7.51 (d, *J* = 7.5 Hz, 1H), 7.44 (t, *J* = 7.5 Hz, 1H), 7.45 – 7.43 (m, 1H), 7.37 – 7.34 (m, 1H), 6.86 – 6.65 (m, 3H), 6.63 – 6.44 (m, 2H), 4.28 (d, *J* = 11.2 Hz, 1H), 3.73 (d, *J* = 11.2 Hz, 1H). (two signals were missing).

**<sup>13</sup>C NMR** (101 MHz, CD<sub>3</sub>OD) δ 157.7 (d, *J* = 234.8 Hz), 153.5, 146.2, 144.9 (d, *J* = 11.5 Hz), 133.4, 132.1, 130.6, 129.7 (d, *J* = 2.5 Hz), 129.5, 126.5, 123.4, 123.4, 119.9, 117.8, 116.7 (d, *J* = 9.1 Hz), 110.13, 108.6 (d, *J* = 22.6 Hz), 104.3 (d, *J* = 26.0 Hz), 84.5, 68.7.

**HRMS:** [M + H]<sup>+</sup> calculated for C<sub>20</sub>H<sub>15</sub>FNO<sub>3</sub><sup>+</sup>: 336.1030, found: 336.1028.

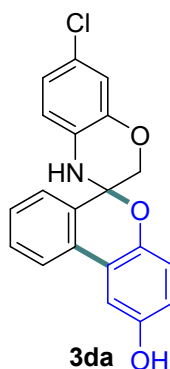

**7-chloro-2H,4H-spiro[benzo[*b*][1,4]oxazine-3,6'-benzo[*c*]chromen]-2'-ol (3da)**

White solid 81% (56.9 mg), mp: 188 – 189 °C.

**<sup>1</sup>H NMR** (400 MHz, DMSO-*d*<sub>6</sub>) δ 9.21 (s, 1H), 7.82 (d, *J* = 7.0 Hz, 1H), 7.60 (s, 1H), 7.55 – 7.48 (m, 2H), 7.44 (d, *J* = 6.1 Hz, 1H), 7.26 (s, 1H), 6.95 – 6.81 (m, 2H), 6.81 – 6.72 (m, 2H), 6.72 – 6.65 (m, 1H), 4.27 (d, *J* = 11.0 Hz, 1H), 3.84 (d, *J* = 10.3 Hz, 1H).

**<sup>13</sup>C NMR** (101 MHz, DMSO-*d*<sub>6</sub>) δ 152.3, 143.9, 143.1, 131.4, 131.4, 130.2, 129.8, 128.4, 125.5, 122.4, 121.6, 121.3, 121.2, 118.5, 117.0, 116.1, 115.6, 109.3, 82.5, 67.2.

**HRMS:** [M + H]<sup>+</sup> calculated for C<sub>20</sub>H<sub>15</sub>ClNO<sub>3</sub><sup>+</sup>: 352.0735, found: 352.0729.

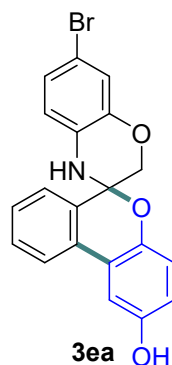

**7-bromo-2*H*,4*H*-spiro[benzo[*b*][1,4]oxazine-3,6'-benzo[*c*]chromen]-2'-ol (3ea)**

White solid 83% (65.5 mg), mp: 208 – 209 °C.

**<sup>1</sup>H NMR** (400 MHz, CD<sub>3</sub>OD) δ 7.75 (d, *J* = 7.6 Hz, 1H), 7.54 – 7.40 (m, 2H), 7.41 – 7.31 (m, 1H), 7.23 (d, *J* = 2.2 Hz, 1H), 6.99 – 6.81 (m, 2H), 6.77 (d, *J* = 8.6 Hz, 1H), 6.70 – 6.68 (m, 2H), 4.28 (d, *J* = 11.2 Hz, 1H), 3.73 (d, *J* = 11.2 Hz, 1H).

**<sup>13</sup>C NMR** (101 MHz, CD<sub>3</sub>OD) δ 153.5, 146.1, 145.2, 133.2, 132.9, 132.1, 130.7, 129.5, 126.4, 125.3, 123.4, 123.4, 119.9, 119.8, 117.9, 117.7, 110.9, 110.1, 84.3, 68.7.

**HRMS:** [M + H]<sup>+</sup> calculated for C<sub>20</sub>H<sub>15</sub>BrNO<sub>3</sub><sup>+</sup>: 396.0230, found: 396.0232.

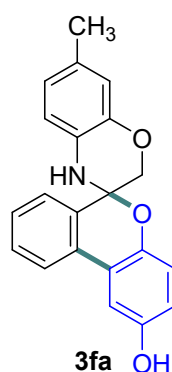

**7-methyl-2*H*,4*H*-spiro[benzo[*b*][1,4]oxazine-3,6'-benzo[*c*]chromen]-2'-ol (3fa)**

White solid 78% (51.7 mg), mp: 129 – 130 °C.

**<sup>1</sup>H NMR** (400 MHz, DMSO-*d*<sub>6</sub>)  $\delta$  9.21 – 9.14 (m, 1H), 7.81 (d, *J* = 8.1 Hz, 1H), 7.56 – 7.47 (m, 2H), 7.47 – 7.36 (m, 1H), 7.28 – 7.25 (m, 1H), 7.21 (s, 1H), 6.77 – 6.72 (m, 1H), 6.72 – 6.67 (m, 2H), 6.63 – 6.59 (m, 2H), 4.24 – 4.20 (m, 1H), 3.75 (d, *J* = 11.2 Hz, 1H), 3.41 – 3.37 (m, 2H), 2.18 (s, 3H).

**<sup>13</sup>C NMR** (101 MHz, CD<sub>3</sub>OD)  $\delta$  153.4, 146.3, 144.2, 133.8, 132.1, 130.7, 130.5, 129.6, 129.4, 126.5, 123.5, 123.3, 123.2, 119.9, 117.8, 117.5, 116.6, 110.1, 84.9, 68.6, 20.7.

**HRMS:** [M + H]<sup>+</sup> calculated for C<sub>21</sub>H<sub>18</sub>NO<sub>3</sub><sup>+</sup>: 332.1281, found: 332.1282.

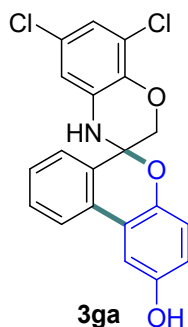

**6,8-dichloro-2H,4H-spiro[benzo[*b*][1,4]oxazine-3,6'-benzo[*c*]chromen]-2'-ol (3ga)**

White solid 37% (28.6 mg), mp: 125 – 126 °C.

**<sup>1</sup>H NMR** (400 MHz, CDCl<sub>3</sub>)  $\delta$  7.71 (d, *J* = 7.7 Hz, 1H), 7.53 – 7.43 (m, 2H), 7.39 (t, *J* = 7.4 Hz, 1H), 7.22 (d, *J* = 2.5 Hz, 1H), 6.95 – 6.83 (m, 2H), 6.74 (dd, *J* = 8.6, 2.6 Hz, 1H), 6.64 (d, *J* = 2.2 Hz, 1H), 4.95 (s, 1H), 4.72 (s, 1H), 4.51 (dd, *J* = 11.4, 2.1 Hz, 1H), 3.88 (d, *J* = 11.4 Hz, 1H).

**<sup>13</sup>C NMR** (101 MHz, CDCl<sub>3</sub>)  $\delta$  151.0, 145.2, 138.3, 133.0, 131.1, 130.3, 129.0, 126.4, 125.0, 122.9, 122.1, 122.0, 120.5, 119.6, 117.3, 114.2, 109.6, 82.9, 68.2.

**HRMS:** [M + H]<sup>+</sup> calculated for C<sub>20</sub>H<sub>14</sub>Cl<sub>2</sub>NO<sub>3</sub><sup>+</sup>: 386.0345, found: 386.0345.

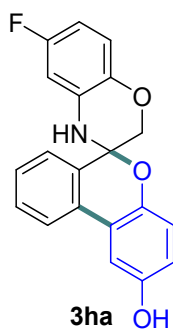

**6-fluoro-2H,4H-spiro[benzo[*b*][1,4]oxazine-3,6'-benzo[*c*]chromen]-2'-ol (3ha)**

White solid 75% (50.3 mg), mp: 196 – 197 °C.

**<sup>1</sup>H NMR** (400 MHz, DMSO-*d*<sub>6</sub>)  $\delta$  9.27 – 9.17 (m, 1H), 7.83 (d, *J* = 7.7 Hz, 1H), 7.70 (d, *J* = 1.6 Hz, 1H), 7.57 – 7.47 (m, 2H), 7.46 – 7.40 (m, 1H), 7.30 – 7.24 (m, 1H), 6.84 – 6.75 (m, 2H), 6.75 – 6.66 (m, 1H), 6.65 – 6.52 (m, 1H), 6.49 – 6.38 (m, 1H), 4.27 – 4.23 (m, 1H), 3.79 (d, *J* = 11.3 Hz, 1H).

$^{13}\text{C}$  NMR (101 MHz, DMSO- $d_6$ )  $\delta$  157.3 (d,  $J = 234.4$  Hz), 152.4, 143.9, 138.6, 133.4 (d,  $J = 11.6$  Hz), 131.4, 130.3, 129.8, 128.4, 125.4, 122.4, 121.6, 118.6, 117.0, 116.4 (d,  $J = 9.9$  Hz), 109.3, 103.8 (d,  $J = 23.3$  Hz), 101.5 (d,  $J = 27.0$  Hz), 82.5, 67.1.

HRMS:  $[\text{M} + \text{H}]^+$  calculated for  $\text{C}_{20}\text{H}_{15}\text{FNO}_3^+$ : 336.1030, found: 336.1033.

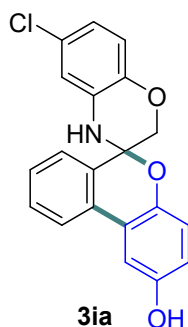

**6-chloro-2H,4H-spiro[benzo[*b*][1,4]oxazine-3,6'-benzo[*c*]chromen]-2'-ol (3ia)**

White solid 84% (59.0 mg), mp: 212 – 213 °C.

$^1\text{H}$  NMR (400 MHz, DMSO- $d_6$ )  $\delta$  9.21 (s, 1H), 7.83 (d,  $J = 7.6$  Hz, 1H), 7.69 (d,  $J = 1.2$  Hz, 1H), 7.56 – 7.47 (m, 2H), 7.47 – 7.41 (m, 1H), 7.27 (d,  $J = 2.7$  Hz, 1H), 6.84 – 6.78 (m, 2H), 6.76 (d,  $J = 8.6$  Hz, 1H), 6.72 – 6.64 (m, 2H), 4.27 (dd,  $J = 11.3, 1.8$  Hz, 1H), 3.83 (d,  $J = 11.3$  Hz, 1H).

$^{13}\text{C}$  NMR (101 MHz, DMSO- $d_6$ )  $\delta$  152.4, 143.8, 141.3, 133.7, 131.3, 130.2, 129.8, 128.5, 125.4, 125.1, 122.4, 121.6, 118.6, 117.6, 117.1, 117.0, 114.3, 109.3, 82.4, 67.1.

HRMS:  $[\text{M} + \text{H}]^+$  calculated for  $\text{C}_{20}\text{H}_{15}\text{ClNO}_3^+$ : 352.0735, found: 352.0740.

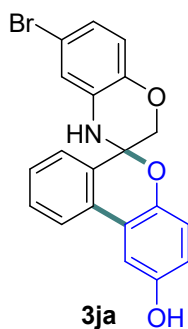

**6-bromo-2H,4H-spiro[benzo[*b*][1,4]oxazine-3,6'-benzo[*c*]chromen]-2'-ol (3ja)**

White solid 86% (67.9 mg), mp: 229 – 230 °C.

$^1\text{H}$  NMR (400 MHz,  $\text{CD}_3\text{OD}$ )  $\delta$  7.78 (d,  $J = 7.8$  Hz, 1H), 7.52 – 7.46 (m, 2H), 7.41 – 7.37 (m, 1H), 7.26 – 7.23 (m, 1H), 6.95 – 6.93 (m, 1H), 6.84 – 6.74 (m, 2H), 6.74 – 6.64 (m, 2H), 4.31 (d,  $J = 11.2$  Hz, 1H), 3.74 (d,  $J = 11.2$  Hz, 1H).

$^{13}\text{C}$  NMR (101 MHz,  $\text{CD}_3\text{OD}$ )  $\delta$  153.6, 146.1, 143.6, 135.2, 133.2, 132.1, 130.7, 130.7, 129.5, 126.4, 123.4, 123.4, 122.4, 119.9, 118.9, 118.4, 117.9, 114.5, 110.1, 84.3, 68.6.



**HRMS:**  $[M + H]^+$  calculated for  $C_{20}H_{15}BrNO_3^+$ : 396.0230, found: 396.0233

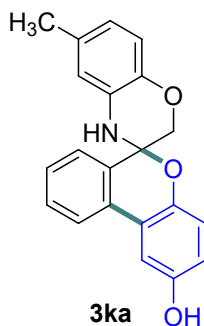

**6-methyl-2H,4H-spiro[benzo**[b]**[1,4]oxazine-3,6'-benzo**[c]**chromen]-2'-ol (3ka)**

White solid 75% (49.7 mg), mp: 220 – 221 °C.

**<sup>1</sup>H NMR** (400 MHz, CD<sub>3</sub>OD)  $\delta$  7.74 (d,  $J$  = 7.6 Hz, 1H), 7.50 (dd,  $J$  = 7.6, 1.1 Hz, 1H), 7.46 – 7.42 (m, 1H), 7.37 – 7.32 (m, 1H), 7.23 (d,  $J$  = 2.8 Hz, 1H), 6.78 (d,  $J$  = 8.7 Hz, 1H), 6.72 – 6.63 (m, 2H), 6.60 (d,  $J$  = 1.4 Hz, 1H), 6.47 (dd,  $J$  = 8.1, 1.5 Hz, 1H), 4.25 (d,  $J$  = 11.1 Hz, 1H), 3.67 (d,  $J$  = 11.2 Hz, 1H), 2.20 (s, 3H).

**<sup>13</sup>C NMR** (101 MHz, DMSO-*d*<sub>6</sub>)  $\delta$  153.4, 146.3, 142.2, 133.7, 132.9, 132.2, 130.5, 129.4, 126.5, 123.4, 120.5, 119.9, 117.8, 117.1, 116.7, 110.1, 84.9, 68.6, 20.9. (one signal was missing due to overlap.)

**HRMS:**  $[M + H]^+$  calculated for  $C_{21}H_{18}NO_3^+$ : 332.1281, found: 332.1283.

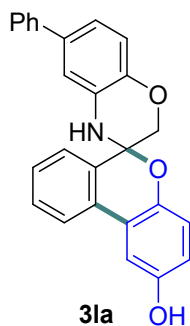

**6-phenyl-2H,4H-spiro[benzo**[b]**[1,4]oxazine-3,6'-benzo**[c]**chromen]-2'-ol (3la)**

White solid 32% (25.2 mg), mp: 88 – 89 °C.

**<sup>1</sup>H NMR** (400 MHz, CDCl<sub>3</sub>)  $\delta$  7.68 (d,  $J$  = 6.8 Hz, 1H), 7.55 – 7.49 (m, 3H), 7.49 – 7.35 (m, 4H), 7.33 – 7.28 (m, 1H), 7.22 – 7.20 (m, 1H), 7.05 – 6.97 (m, 2H), 6.96 – 6.93 (m, 1H), 6.91 (dd,  $J$  = 8.6, 1.7 Hz, 1H), 6.73 – 6.70 (m, 1H), 5.17 (s, 1H), 4.93 (s, 1H), 4.42 (dd,  $J$  = 11.3, 2.1 Hz, 1H), 3.88 (d,  $J$  = 11.3 Hz, 1H).

**<sup>13</sup>C NMR** (101 MHz, CDCl<sub>3</sub>)  $\delta$  150.9, 145.5, 143.0, 141.1, 135.4, 132.0, 131.2, 130.7, 130.0, 128.8, 128.8, 126.9, 126.9, 125.3, 122.7, 122.2, 119.5, 119.2, 117.3, 117.0, 114.6, 109.6, 83.7, 67.9.

**HRMS:**  $[M + H]^+$  calculated for  $C_{26}H_{20}NO_3^+$ : 394.1438, found: 394.1439.

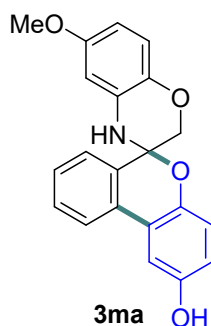

**6-methoxy-2H,4H-spiro[benzo[*b*][1,4]oxazine-3,6'-benzo[*c*]chromen]-2'-ol (3ma)**

White solid 43% (29.9 mg), mp: 175 – 176 °C.

**<sup>1</sup>H NMR** (400 MHz, CDCl<sub>3</sub>) δ 7.61 (d, *J* = 7.6 Hz, 1H), 7.45 (dd, *J* = 7.7, 0.9 Hz, 1H), 7.43 – 7.38 (m, 1H), 7.35 – 7.32 (m, 1H), 7.17 (d, *J* = 2.8 Hz, 1H), 6.88 – 6.82 (m, 2H), 6.68 (dd, *J* = 8.7, 2.8 Hz, 1H), 6.36 (dd, *J* = 8.7, 2.8 Hz, 1H), 6.31 (d, *J* = 2.8 Hz, 1H), 5.59 (s, 1H), 4.91 (s, 1H), 4.35 (dd, *J* = 11.3, 1.6 Hz, 1H), 3.80 (d, *J* = 11.3 Hz, 1H), 3.73 (s, 3H).

**<sup>13</sup>C NMR** (101 MHz, CDCl<sub>3</sub>) δ 154.8, 150.9, 145.4, 137.4, 132.0, 131.7, 130.6, 129.9, 128.7, 125.1, 122.7, 122.2, 119.4, 117.2, 117.0, 109.6, 105.1, 101.9, 83.7, 67.8, 55.8.

**HRMS:** [M + H]<sup>+</sup> calculated for C<sub>21</sub>H<sub>18</sub>NO<sub>4</sub><sup>+</sup> : 348.1230, found: 348.1237.

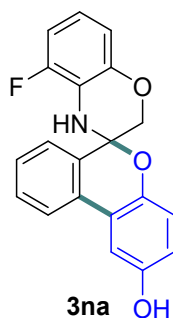

**5-fluoro-2H,4H-spiro[benzo[*b*][1,4]oxazine-3,6'-benzo[*c*]chromen]-2'-ol (3na)**

White solid 61% (40.9 mg), mp: 166 – 167 °C.

**<sup>1</sup>H NMR** (400 MHz, CDCl<sub>3</sub>) δ 7.70 (d, *J* = 7.7 Hz, 1H), 7.56 (d, *J* = 7.6 Hz, 1H), 7.50 – 7.46 (m, 1H), 7.43 – 7.39 (m, 1H), 7.23 (d, *J* = 2.8 Hz, 1H), 6.90 (d, *J* = 8.6 Hz, 1H), 6.77 – 6.69 (m, 4H), 4.98 (s, 1H), 4.86 (s, 1H), 4.42 (dd, *J* = 11.4, 2.4 Hz, 1H), 3.86 (d, *J* = 11.4 Hz, 1H).

**<sup>13</sup>C NMR** (101 MHz, CDCl<sub>3</sub>) δ 151.9 (d, *J* = 239.0 Hz), 150.9, 145.5, 144.7 (d, *J* = 5.4 Hz), 131.7, 130.7, 130.1, 128.9, 125.4, 122.7, 122.3, 120.4 (d, *J* = 15.6 Hz), 119.5, 118.7 (d, *J* = 9.0 Hz), 117.3, 112.1 (d, *J* = 2.8 Hz), 109.6, 108.3 (d, *J* = 18.3 Hz), 82.7, 67.8.

**HRMS:** [M + H]<sup>+</sup> calculated for C<sub>20</sub>H<sub>15</sub>FNO<sub>3</sub><sup>+</sup> : 336.1030, found: 336.1027.

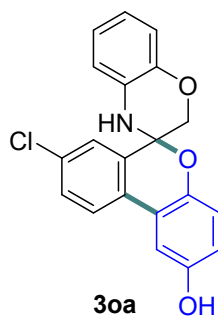

**8'-chloro-2H,4H-spiro[benzo[*b*][1,4]oxazine-3,6'-benzo[*c*]chromen]-2'-ol (3oa)**

White solid 64% (45.0 mg), mp: 205 – 206 °C.

**<sup>1</sup>H NMR** (400 MHz, CDCl<sub>3</sub>)  $\delta$  7.60 (d,  $J$  = 8.4 Hz, 1H), 7.53 (d,  $J$  = 1.1 Hz, 1H), 7.43 (dd,  $J$  = 8.3, 1.8 Hz, 1H), 7.16 (d,  $J$  = 2.4 Hz, 1H), 6.94 – 6.88 (m, 3H), 6.86 – 6.80 (m, 1H), 6.79 – 6.68 (m, 2H), 4.77 (s, 1H), 4.72 (s, 1H), 4.36 (dd,  $J$  = 11.3, 2.3 Hz, 1H), 3.81 (d,  $J$  = 11.4 Hz, 1H).

**<sup>13</sup>C NMR** (101 MHz, CDCl<sub>3</sub>)  $\delta$  150.9, 145.6, 143.4, 134.7, 133.8, 130.8, 130.1, 129.3, 125.7, 124.2, 122.2, 121.4, 120.6, 119.7, 117.6, 116.8, 116.2, 109.5, 83.5, 67.4.

**HRMS** [M + H]<sup>+</sup> calculated for C<sub>20</sub>H<sub>15</sub>ClNO<sub>3</sub><sup>+</sup> = 352.0735, found: 352.0740.

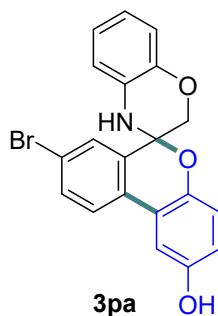

**8'-bromo-2H,4H-spiro[benzo[*b*][1,4]oxazine-3,6'-benzo[*c*]chromen]-2'-ol (3pa)**

White solid 69% (54.7 mg), mp: 148 – 149 °C.

**<sup>1</sup>H NMR** (400 MHz, CDCl<sub>3</sub>)  $\delta$  7.66 (d,  $J$  = 2.0 Hz, 1H), 7.56 (dd,  $J$  = 8.4, 2.0 Hz, 1H), 7.49 (d,  $J$  = 8.4 Hz, 1H), 7.14 (d,  $J$  = 2.9 Hz, 1H), 6.95 – 6.85 (m, 3H), 6.84 – 6.80 (m, 1H), 6.78 – 6.70 (m, 2H), 4.91 (s, 1H), 4.79 (d,  $J$  = 2.0 Hz, 1H), 4.35 (dd,  $J$  = 11.4, 2.5 Hz, 1H), 3.80 (d,  $J$  = 11.4 Hz, 1H).

**<sup>13</sup>C NMR** (101 MHz, CDCl<sub>3</sub>)  $\delta$  150.9, 145.5, 143.3, 133.9, 133.0, 130.8, 129.7, 128.6, 124.4, 122.7, 122.2, 121.4, 120.6, 119.7, 117.7, 116.8, 116.2, 109.4, 83.4, 67.4.

**HRMS** [M + H]<sup>+</sup> calculated for C<sub>20</sub>H<sub>15</sub>BrNO<sub>3</sub><sup>+</sup> : 396.0230, found: 396.0224.

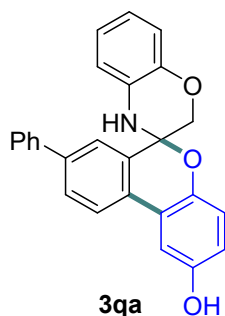

**8'-phenyl-2H,4H-spiro[benzo[*b*][1,4]oxazine-3,6'-benzo[*c*]chromen]-2'-ol (3qa)**

White solid 41% (32.3 mg), mp: 194 – 195 °C.

**<sup>1</sup>H NMR** (400 MHz, CDCl<sub>3</sub>) δ 7.79 – 7.74 (m, 2H), 7.71 (dd, *J* = 8.2, 1.7 Hz, 1H), 7.66 – 7.60 (m, 2H), 7.47 (t, *J* = 7.5 Hz, 2H), 7.41 – 7.36 (m, 1H), 7.25 (d, *J* = 3.0 Hz, 1H), 6.97 – 6.87 (m, 3H), 6.85 – 6.80 (m, 1H), 6.80 – 6.71 (m, 2H), 4.85 (d, *J* = 1.8 Hz, 1H), 4.76 (s, 1H), 4.43 (dd, *J* = 11.4, 2.5 Hz, 1H), 3.91 (d, *J* = 11.4 Hz, 1H).

**<sup>13</sup>C NMR** (101 MHz, CDCl<sub>3</sub>) δ 150.8, 145.7, 143.5, 141.7, 140.1, 132.7, 131.1, 129.7, 129.1, 128.5, 128.0, 127.1, 124.0, 123.3, 122.1, 120.4, 119.5, 117.2, 116.8, 116.1, 109.5, 83.9, 67.8.

**HRMS** [M + H]<sup>+</sup> calculated for C<sub>26</sub>H<sub>20</sub>NO<sub>3</sub><sup>+</sup>: 394.1438, found: 394.1447.

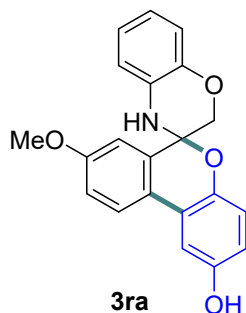

**8'-methoxy-2H,4H-spiro[benzo[*b*][1,4]oxazine-3,6'-benzo[*c*]chromen]-2'-ol (3ra)**

White solid 68% (47.2 mg), mp: 220 – 221 °C.

**<sup>1</sup>H NMR** (400 MHz, CD<sub>3</sub>OD) δ 7.71 (d, *J* = 8.6 Hz, 1H), 7.17 (d, *J* = 2.8 Hz, 1H), 7.12 (d, *J* = 2.7 Hz, 1H), 7.04 (dd, *J* = 8.6, 2.7 Hz, 1H), 6.84 – 6.80 (m, 2H), 6.80 – 6.74 (m, 2H), 6.72 – 6.66 (m, 1H), 6.64 (dd, *J* = 8.6, 2.8 Hz, 1H), 4.27 (d, *J* = 11.2 Hz, 1H), 3.85 (s, 3H), 3.72 (d, *J* = 11.2 Hz, 1H). (two signals are missing).

**<sup>13</sup>C NMR** (101 MHz, CD<sub>3</sub>OD) δ 161.6, 153.5, 145.6, 144.4, 135.3, 133.4, 125.0, 124.9, 123.7, 122.7, 120.0, 119.7, 117.0, 116.7, 116.7, 116.3, 111.7, 109.6, 84.8, 68.4, 55.9.

**HRMS** [M + H]<sup>+</sup> calculated for C<sub>21</sub>H<sub>18</sub>NO<sub>4</sub><sup>+</sup>: 348.1230, found: 348.1230.

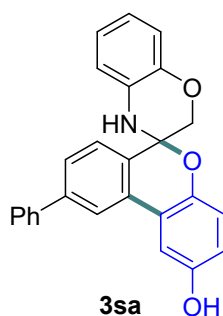

**9'-phenyl-2H,4H-spiro[benzo**[b]**[1,4]oxazine-3,6'-benzo[c]chromen]-2'-ol (3sa)**

White solid 65% (51.1 mg), mp: 159 – 160 °C.

**<sup>1</sup>H NMR** (400 MHz, CDCl<sub>3</sub>) δ 7.88 (s, 1H), 7.63 (d, *J* = 7.3 Hz, 2H), 7.60 – 7.56 (m, 2H), 7.51 – 7.46 (m, 2H), 7.43 – 7.40 (m, 1H), 7.29 (d, *J* = 2.7 Hz, 1H), 6.96 – 6.92 (m, 2H), 6.88 (dd, *J* = 7.5, 1.4 Hz, 1H), 6.84 – 6.80 (m, 1H), 6.79 – 6.70 (m, 2H), 4.84 (s, 1H), 4.75 (s, 1H), 4.43 (dd, *J* = 11.3, 2.2 Hz, 1H), 3.90 (d, *J* = 11.3 Hz, 1H).

**<sup>13</sup>C NMR** (101 MHz, CDCl<sub>3</sub>) δ 150.8, 145.9, 143.5, 143.0, 140.5, 131.1, 129.1, 128.1, 127.6, 127.3, 125.9, 122.2, 122.1, 121.5, 120.3, 119.6, 117.4, 116.8, 116.0, 109.6, 83.7, 67.8.

**HRMS** [M + H]<sup>+</sup> calculated for C<sub>26</sub>H<sub>20</sub>NO<sub>3</sub><sup>+</sup>: 394.1438, found: 394.1438.

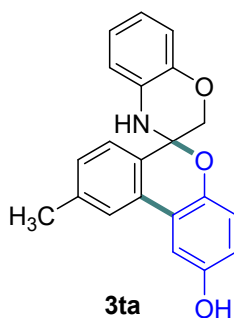

**9'-methyl-2H,4H-spiro[benzo**[b]**[1,4]oxazine-3,6'-benzo[c]chromen]-2'-ol (3ta)**

White solid 65% (43.08 mg), mp: 106 – 107 °C.

**<sup>1</sup>H NMR** (400 MHz, CDCl<sub>3</sub>) δ 7.49 (s, 1H), 7.39 (d, *J* = 7.8 Hz, 1H), 7.23 – 7.15 (m, 2H), 6.93 (d, *J* = 7.9 Hz, 1H), 6.91 – 6.85 (m, 2H), 6.82 – 6.78 (m, 1H), 6.73 (dd, *J* = 7.7, 1.4 Hz, 1H), 6.69 (dd, *J* = 8.6, 2.9 Hz, 1H), 4.86 (s, 1H), 4.79 (s, 1H), 4.37 (dd, *J* = 11.3, 2.3 Hz, 1H), 3.84 (d, *J* = 11.3 Hz, 1H), 2.42 (s, 3H).

**<sup>13</sup>C NMR** (101 MHz, CDCl<sub>3</sub>) δ 150.7, 145.8, 143.4, 139.8, 131.2, 130.5, 129.6, 129.4, 125.2, 123.3, 122.0, 120.2, 119.5, 117.1, 116.7, 115.9, 109.5, 83.7, 67.9, 21.6.

**HRMS** [M + H]<sup>+</sup> calculated for C<sub>21</sub>H<sub>18</sub>NO<sub>3</sub><sup>+</sup>: 332.1281, found: 332.1280.

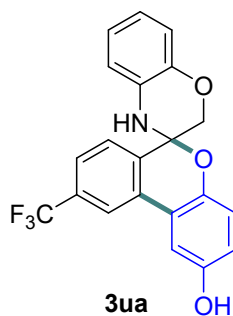

**9'-(trifluoromethyl)-2H,4H-spiro[benzo[b][1,4]oxazine-3,6'-benzo[c]chromen]-2'-ol (3ua)**

White solid 64% (49.3 mg), mp: 185 – 186 °C.

**<sup>1</sup>H NMR** (400 MHz, CDCl<sub>3</sub>) δ 7.92 (s, 1H), 7.69 – 7.59 (m, 2H), 7.24 (d, *J* = 2.8 Hz, 1H), 6.95 – 6.92 (m, 2H), 6.91 – 6.81 (m, 2H), 6.79 – 6.76 (m, 2H), 4.81 (s, 1H), 4.73 (s, 1H), 4.39 (dd, *J* = 11.3, 2.4 Hz, 1H), 3.84 (d, *J* = 11.4 Hz, 1H).

**<sup>13</sup>C NMR** (101 MHz, CDCl<sub>3</sub>) δ 151.0, 145.7, 143.3, 135.3, 132.2 (q, *J* = 32 Hz), 131.6, 130.7, 126.2, 125.2 (q, *J* = 2.5 Hz), 122.6 (q, *J* = 270 Hz), 122.3, 121.0, 120.7, 119.8, 119.61 (q, *J* = 3.7 Hz), 118.3, 116.8, 116.2, 109.6, 83.7, 67.4.

**HRMS** [M + H]<sup>+</sup> calculated for C<sub>21</sub>H<sub>15</sub>F<sub>3</sub>NO<sub>3</sub><sup>+</sup> : 386.0999, found: 368.1001.

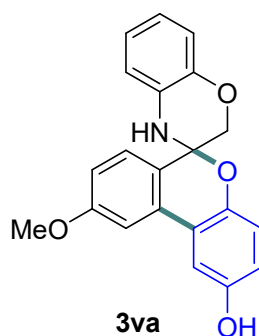

**9'-methoxy-2H,4H-spiro[benzo[b][1,4]oxazine-3,6'-benzo[c]chromen]-2'-ol (3va)**

White solid 33% (22.9 mg), mp: 207 – 208 °C.

**<sup>1</sup>H NMR** (400 MHz, CDCl<sub>3</sub>) δ 7.43 (d, *J* = 8.4 Hz, 1H), 7.20 (s, 1H), 7.18 (s, 1H), 7.04 – 6.84 (m, 4H), 6.82 – 6.78 (m, 1H), 6.75 – 6.71 (m, 2H), 4.35 (d, *J* = 11.3 Hz, 1H), 3.88 (s, 3H), 3.82 (d, *J* = 11.3 Hz, 1H).

**<sup>13</sup>C NMR** (101 MHz, CDCl<sub>3</sub>) δ 160.9, 146.0, 143.4, 132.2, 131.2, 126.8, 124.7, 124.7, 122.1, 122.0, 120.2, 119.5, 117.3, 116.7, 115.9, 115.9, 114.2, 108.0, 83.6, 68.0, 55.6.

**HRMS** [M + H]<sup>+</sup> calculated for C<sub>21</sub>H<sub>18</sub>NO<sub>4</sub><sup>+</sup> = 348.1230, found: 348.1228.

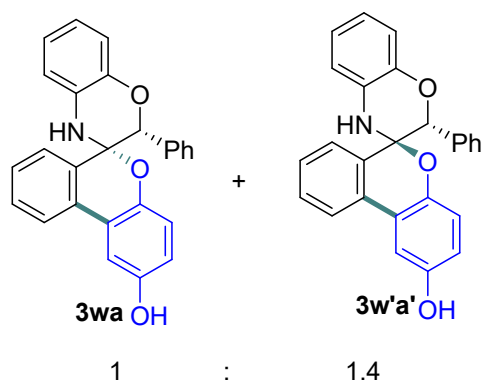

**2-phenyl-2H,4H-spiro[benzo[b][1,4]oxazine-3,6'-benzo[c]chromen]-2'-ol (3wa and 3w'a')**

White solid 39%, mp: 139 – 140 °C.

**<sup>1</sup>H NMR** (400 MHz, CDCl<sub>3</sub>)  $\delta$  7.62 – 7.53 (m, 2.4H), 7.40 – 7.32 (m, 3.8H), 7.32 – 7.26 (m, 1H), 7.21 (d,  $J$  = 2.9 Hz, 1H), 7.12 – 7.09 (m, 1.4H), 7.07 – 7.02 (dd,  $J$  = 7.9, 1.5 Hz, 1.4H), 7.02 – 6.79 (m, 1.8H), 6.75 – 6.65 (m, 8H), 6.52 (dd,  $J$  = 8.7, 2.9 Hz, 1.4H), 5.38 (d,  $J$  = 1.9 Hz, 1H), 5.09 (s, 1.4H), 4.91 (s, 1.4H), 4.77 (d,  $J$  = 2.0 Hz, 1H).

**<sup>13</sup>C NMR** (101 MHz, CDCl<sub>3</sub>)  $\delta$  150.8, 149.2, 147.1, 145.7, 143.8, 143.6, 137.4, 134.3, 131.7, 131.0, 130.9, 130.7, 130.6, 130.3, 129.6, 129.4, 128.6, 128.2, 128.0, 127.9, 127.8, 127.5, 127.4, 126.8, 126.7, 126.6, 122.6, 122.1, 122.0, 121.4, 121.0, 119.9, 119.6, 119.4, 117.7, 117.1, 116.7, 116.2, 116.0, 115.3, 109.5, 108.5, 86.1, 84.9, 82.7. (two signals are missing due to overlap).

**HRMS** [M + H]<sup>+</sup> calculated for C<sub>26</sub>H<sub>20</sub>NO<sub>3</sub><sup>+</sup>: 394.1438, found: 394.1450.

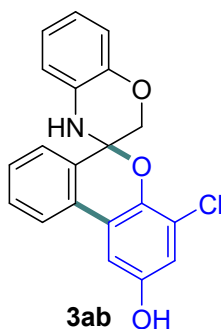

**4'-chloro-2H,4H-spiro[benzo[b][1,4]oxazine-3,6'-benzo[c]chromen]-2'-ol (3ab)**

White solid 20% (14.1 mg), mp : 197 – 198 °C.

**<sup>1</sup>H NMR** (400 MHz, CDCl<sub>3</sub>)  $\delta$  7.71 (d,  $J$  = 7.5 Hz, 1H), 7.56 – 7.45 (m, 2H), 7.45 – 7.36 (m, 2H), 7.04 (s, 1H), 6.96 – 6.87 (m, 2H), 6.85 – 6.81 (m, 1H), 6.76 (dd,  $J$  = 7.7, 1.6 Hz, 1H), 5.34 (s, 1H), 4.79 (d,  $J$  = 1.7, 1H), 4.38 (dd,  $J$  = 11.4, 2.5 Hz, 1H), 3.86 (d,  $J$  = 11.4 Hz, 1H).

$^{13}\text{C}$  NMR (101 MHz,  $\text{CDCl}_3$ )  $\delta$  146.8, 145.6, 143.3, 131.9, 130.8, 130.1, 130.0, 129.1, 125.4, 122.8, 122.1, 121.8, 120.7, 120.5, 118.8, 116.8, 116.0, 110.0, 84.1, 67.7.

HRMS  $[\text{M} + \text{H}]^+$  calculated for  $\text{C}_{20}\text{H}_{15}\text{ClNO}_3^+$  : 352.0735, found: 352.0752.

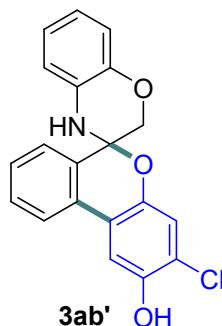

**3'-chloro-2*H*,4*H*-spiro[benzo[*b*][1,4]oxazine-3,6'-benzo[*c*]chromen]-2'-ol (3ab')**

White solid 19% (13.4 mg), mp: 148 – 149 °C.

$^1\text{H}$  NMR (400 MHz,  $\text{CDCl}_3$ )  $\delta$  7.70 (d,  $J = 7.7$  Hz, 1H), 7.55 (d,  $J = 7.2$  Hz, 1H), 7.51 – 7.48 (m, 1H), 7.44 – 7.40 (m, 1H), 7.15 (d,  $J = 2.7$  Hz, 1H), 6.95 (d,  $J = 7.4$  Hz, 1H), 6.91 – 6.80 (m, 3H), 6.77 (dd, 1H), 4.85 (s, 1H), 4.81 (s, 1H), 4.35 (dd,  $J = 11.4, 2.4$  Hz, 1H), 3.86 (d,  $J = 11.4$  Hz, 1H).

$^{13}\text{C}$  NMR (101 MHz,  $\text{CDCl}_3$ )  $\delta$  150.4, 143.7, 142.0, 132.4, 130.8, 130.2, 130.1, 129.4, 125.3, 124.3, 123.8, 123.1, 121.9, 120.5, 117.7, 116.7, 116.2, 108.5, 84.7, 67.6.

HRMS  $[\text{M} + \text{H}]^+$  calculated for  $\text{C}_{20}\text{H}_{15}\text{ClNO}_3^+$  : 352.0735, found: 352.0752.

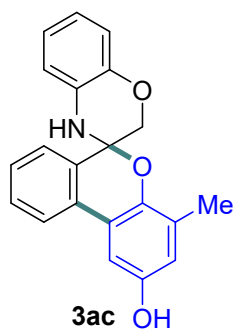

**4'-methyl-2*H*,4*H*-spiro[benzo[*b*][1,4]oxazine-3,6'-benzo[*c*]chromen]-2'-ol (3ac)**

White solid 23% (15.2 mg), mp: 220 – 221 °C.

$^1\text{H}$  NMR (400 MHz,  $\text{CDCl}_3$ )  $\delta$  7.65 (d,  $J = 7.7$  Hz, 1H), 7.51 (d,  $J = 7.6$  Hz, 1H), 7.47 – 7.43 (m, 1H), 7.37 – 7.34 (m, 1H), 7.15 (s, 1H), 6.94 (d,  $J = 7.8$  Hz, 1H), 6.91 – 6.87 (m, 1H), 6.83 – 6.79 (m, 2H), 6.75 (d,  $J = 7.6$  Hz, 1H), 4.79 (s, 1H), 4.61 (s, 1H), 4.40 (dd,  $J = 11.3, 2.2$  Hz, 1H), 3.85 (d,  $J = 11.3$  Hz, 1H), 2.21 (s, 3H).



$^{13}\text{C}$  NMR (101 MHz,  $\text{CDCl}_3$ )  $\delta$  149.1, 145.5, 143.5, 131.9, 131.2, 130.9, 129.9, 128.3, 126.5, 125.3, 122.3, 122.0, 120.6, 120.2, 119.9, 116.7, 116.0, 109.1, 83.6, 67.8, 16.1.

HRMS  $[\text{M} + \text{H}]^+$  calculated for  $\text{C}_{21}\text{H}_{18}\text{NO}_3^+$  = 332.1281, found: 332.1283.

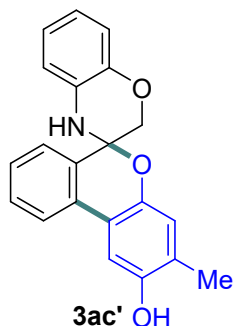

**3'-methyl-2H,4H-spiro[benzo[*b*][1,4]oxazine-3,6'-benzo[*c*]chromen]-2'-ol (3ac')**

White solid 23% (15.2 mg), mp: 125 – 126 °C.

$^1\text{H}$  NMR (400 MHz,  $\text{CDCl}_3$ )  $\delta$  7.67 (d,  $J$  = 7.7 Hz, 1H), 7.51 (d,  $J$  = 7.6 Hz, 1H), 7.47 – 7.43 (m, 1H), 7.38 – 7.35 (m, 1H), 7.04 (d,  $J$  = 2.5 Hz, 1H), 6.92 (d,  $J$  = 7.7 Hz, 1H), 6.89 – 6.85 (m, 1H), 6.83 – 6.79 (m, 1H), 6.75 (d,  $J$  = 7.6 Hz, 1H), 6.61 (d,  $J$  = 2.2 Hz, 1H), 4.80 (s, 1H), 4.67 (s, 1H), 4.34 (dd,  $J$  = 11.2, 2.2 Hz, 1H), 3.85 (d,  $J$  = 11.2 Hz, 1H), 2.11 (s, 3H).

$^{13}\text{C}$  NMR (101 MHz,  $\text{CDCl}_3$ )  $\delta$  150.1, 143.8, 143.6, 132.4, 131.3, 131.1, 129.8, 128.6, 125.0, 122.9, 122.1, 121.8, 120.3, 118.4, 116.5, 116.2, 107.0, 83.6, 67.6, 15.8. (one signal was missing due to overlap).

HRMS  $[\text{M} + \text{H}]^+$  calculated for  $\text{C}_{21}\text{H}_{18}\text{NO}_3^+$  : 332.1281, found: 332.1283.

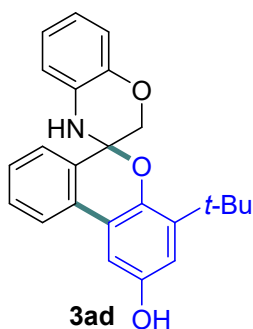

**4'-(tert-butyl)-2H,4H-spiro[benzo[*b*][1,4]oxazine-3,6'-benzo[*c*]chromen]-2'-ol (3ad)**

White solid 23% (17.2 mg), mp: 124 – 125 °C.

$^1\text{H}$  NMR (400 MHz,  $\text{CDCl}_3$ )  $\delta$  7.62 (d,  $J$  = 7.7 Hz, 1H), 7.51 (d,  $J$  = 7.5 Hz, 1H), 7.46 – 7.42 (m, 1H), 7.37 – 7.33 (m, 1H), 7.03 (s, 1H), 6.96 – 6.93 (m, 2H), 6.91 – 6.87 (m, 1H), 6.84 – 6.80 (m, 1H), 6.76

(dd,  $J = 7.6, 1.4$  Hz, 1H), 4.80 (s, 1H), 4.75 (s, 1H), 4.43 (dd,  $J = 11.3, 2.2$  Hz, 1H), 3.86 (d,  $J = 11.3$  Hz, 1H), 1.38 (s, 9H).

$^{13}\text{C}$  NMR (101 MHz,  $\text{CDCl}_3$ )  $\delta$  149.4, 145.4, 143.3, 139.3, 131.7, 131.2, 130.5, 129.8, 128.3, 125.4, 122.1, 122.1, 120.2, 119.1, 117.3, 116.8, 115.9, 110.3, 83.7, 68.0, 34.9, 29.6.

HRMS  $[\text{M} + \text{H}]^+$  calculated for  $\text{C}_{24}\text{H}_{24}\text{NO}_3^+$ : 374.1751, found: 374.1758.

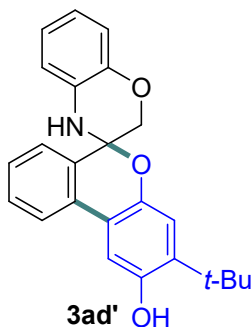

**3'-(tert-butyl)-2H,4H-spiro[benzo[b][1,4]oxazine-3,6'-benzo[c]chromen]-2'-ol (3ad')**

White solid 23% (17.2 mg), mp: 118 – 119 °C.

$^1\text{H}$  NMR (400 MHz,  $\text{CDCl}_3$ )  $\delta$  7.70 (d,  $J = 7.6$  Hz, 1H), 7.54 – 7.43 (m, 2H), 7.40 – 7.36 (m, 1H), 7.13 (d,  $J = 2.6$  Hz, 1H), 6.93 – 6.75 (m, 4H), 6.70 (d,  $J = 7.4$  Hz, 1H), 4.78 (s, 1H), 4.56 (s, 1H), 4.48 (dd,  $J = 11.2, 1.8$  Hz, 1H), 4.04 (d,  $J = 11.2$  Hz, 1H), 1.24 (s, 9H).

$^{13}\text{C}$  NMR (101 MHz,  $\text{CDCl}_3$ )  $\delta$  149.7, 144.4, 143.2, 141.7, 131.8, 131.3, 131.0, 129.8, 128.5, 124.5, 123.2, 122.3, 121.8, 120.2, 116.7, 115.6, 115.6, 107.1, 83.1, 68.0, 35.0, 29.8.

HRMS  $[\text{M} + \text{H}]^+$  calculated for  $\text{C}_{24}\text{H}_{24}\text{NO}_3^+$ : 374.1751, found: 374.1758.

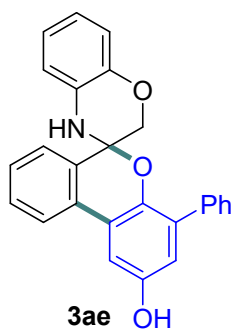

**4'-phenyl-2H,4H-spiro[benzo[b][1,4]oxazine-3,6'-benzo[c]chromen]-2'-ol (3ae)**

White solid 14 % (11.0 mg), mp: 101 – 102 °C.

$^1\text{H}$  NMR (400 MHz,  $\text{CDCl}_3$ )  $\delta$  7.77 (d,  $J = 7.7$  Hz, 1H), 7.54 (d,  $J = 7.6$  Hz, 1H), 7.52 – 7.44 (m, 5H), 7.43 – 7.37 (m, 3H), 6.97 (s, 1H), 6.94 – 6.85 (m, 2H), 6.82 – 6.78 (m, 1H), 6.76 (dd,  $J = 7.6, 1.4$  Hz, 1H), 5.10 (s, 1H), 4.81 (s, 1H), 4.46 (dd,  $J = 11.3, 2.0$  Hz, 1H), 3.90 (d,  $J = 11.3$  Hz, 1H).

$^{13}\text{C}$  NMR (101 MHz,  $\text{CDCl}_3$ )  $\delta$  147.7, 145.6, 143.4, 136.5, 132.2, 131.1, 130.6, 130.0, 129.9, 129.5, 129.0, 128.8, 128.3, 125.4, 122.8, 122.0, 121.9, 120.3, 119.7, 116.7, 116.0, 110.0, 83.7, 67.9.

HRMS  $[\text{M} + \text{H}]^+$  calculated for  $\text{C}_{26}\text{H}_{20}\text{NO}_3^+$ : 394.1438, found: 394.1451.

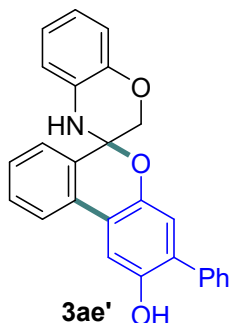

**3'-phenyl-2*H*,4*H*-spiro[benzo[*b*][1,4]oxazine-3,6'-benzo[*c*]chromen]-2'-ol (3ae')**

White solid 13% (10.2 mg), mp : 120-121 °C.

$^1\text{H}$  NMR (400 MHz,  $\text{CDCl}_3$ )  $\delta$  7.69 (d,  $J = 7.6$  Hz, 1H), 7.60 – 7.52 (m, 2H), 7.50 – 7.43 (m, 2H), 7.35 (t,  $J = 7.5$  Hz, 1H), 7.22 (d,  $J = 2.9$  Hz, 1H), 7.19 – 7.10 (m, 3H), 6.97 (dd,  $J = 7.8, 1.2$  Hz, 1H), 6.87 – 6.75 (m, 3H), 6.50 (dd,  $J = 7.6, 1.5$  Hz, 1H), 4.76 (d, 1H), 4.68 (s, 1H), 4.55 (dd,  $J = 11.3, 2.5$  Hz, 1H), 3.97 (d,  $J = 11.3$  Hz, 1H).

$^{13}\text{C}$  NMR (101 MHz,  $\text{CDCl}_3$ )  $\delta$  150.4, 143.3, 142.6, 136.9, 133.1, 131.8, 131.1, 130.7, 129.8, 129.6, 128.8, 128.1, 127.3, 124.9, 123.1, 123.0, 121.9, 120.4, 118.3, 116.4, 116.4, 108.8, 83.6, 67.8.

HRMS  $[\text{M} + \text{H}]^+$  calculated for  $\text{C}_{26}\text{H}_{20}\text{NO}_3^+$ : 394.1438, found: 394.1451.

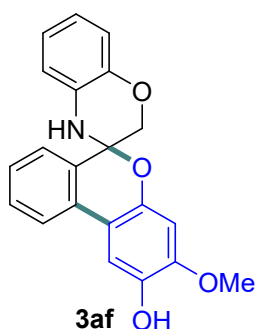

**3'-methoxy-2*H*,4*H*-spiro[benzo[*b*][1,4]oxazine-3,6'-benzo[*c*]chromen]-2'-ol (3af)**

White solid 61% (42.4 mg), mp: 163 – 164 °C.

$^1\text{H}$  NMR (400 MHz,  $\text{CDCl}_3$ )  $\delta$  7.63 (d,  $J = 7.7$  Hz, 1H), 7.53 – 7.40 (m, 2H), 7.35 – 7.28 (m, 2H), 6.94 (dd,  $J = 7.8, 1.5$  Hz, 1H), 6.90 – 6.86 (m, 1H), 6.83 – 6.80 (m, 1H), 6.75 (dd,  $J = 7.7, 1.5$  Hz, 1H), 6.58 (s, 1H), 5.36 (s, 1H), 4.82 (s, 1H), 4.44 (dd,  $J = 11.3, 2.3$  Hz, 1H), 3.87 (d,  $J = 11.4$  Hz, 1H), 3.85 (s, 3H).

$^{13}\text{C}$  NMR (101 MHz,  $\text{CDCl}_3$ )  $\delta$  148.1, 145.6, 143.4, 141.1, 131.1, 131.0, 130.9, 129.9, 127.7, 125.1, 122.1, 122.0, 120.2, 116.7, 115.9, 113.9, 108.3, 101.7, 83.9, 67.8, 56.2.

HRMS  $[\text{M} + \text{H}]^+$  calculated for  $\text{C}_{21}\text{H}_{18}\text{NO}_4^+$ : 348.1230, found: 348.1230.

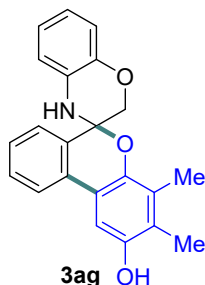

**3',4'-dimethyl-2H,4H-spiro[benzo[b][1,4]oxazine-3,6'-benzo[c]chromen]-2'-ol (3ag)**

White solid 45% (31.1 mg), mp: 185 – 186 °C.

$^1\text{H}$  NMR (400 MHz,  $\text{CDCl}_3$ )  $\delta$  7.67 (d,  $J = 7.7$  Hz, 1H), 7.54 – 7.48 (m, 1H), 7.47 – 7.43 (m, 1H), 7.37 – 7.33 (m, 1H), 7.04 (s, 1H), 6.95 – 6.84 (m, 2H), 6.84 – 6.72 (m, 2H), 4.77 (s, 1H), 4.53 (s, 1H), 4.35 (dd,  $J = 11.2, 2.5$  Hz, 1H), 3.85 (d,  $J = 11.2$  Hz, 1H), 2.18 (s, 3H), 2.09 (s, 3H).

$^{13}\text{C}$  NMR (101 MHz,  $\text{CDCl}_3$ )  $\delta$  148.7, 143.7, 143.7, 132.3, 131.4, 131.4, 129.8, 128.3, 128.2, 125.2, 125.0, 122.6, 121.8, 120.3, 119.4, 116.5, 116.2, 106.5, 83.6, 67.6, 12.3, 12.1.

HRMS:  $[\text{M} + \text{H}]^+$  calculated for  $\text{C}_{22}\text{H}_{20}\text{NO}_3^+$ : 346.1438, found: 346.1441.

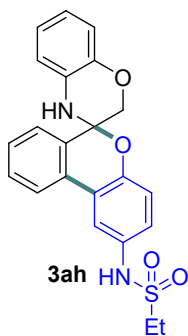

**N-(2H,4H-spiro[benzo[b][1,4]oxazine-3,6'-benzo[c]chromen]-2'-yl)ethanesulfonamide (3ah)**

White solid 32% (26.1 mg), mp: 172 – 173 °C.

$^1\text{H}$  NMR (400 MHz,  $\text{CDCl}_3$ )  $\delta$  7.78 (d,  $J = 7.6$  Hz, 1H), 7.73 (d,  $J = 2.4$  Hz, 1H), 7.56 – 7.48 (m, 2H), 7.44 – 7.40 (m, 1H), 7.06 (dd,  $J = 8.6, 2.5$  Hz, 1H), 6.99 (d,  $J = 8.6$  Hz, 1H), 6.95 – 6.87 (m, 2H), 6.85 – 6.80 (m, 1H), 6.77 (dd,  $J = 7.6, 1.4$  Hz, 1H), 6.61 (s, 1H), 4.84 (d,  $J = 1.6$  Hz, 1H), 4.37 (dd,  $J = 11.4, 2.4$  Hz, 1H), 3.87 (d,  $J = 11.4$  Hz, 1H), 3.12 (q,  $J = 7.4$  Hz, 2H), 1.41 (t,  $J = 7.4$  Hz, 3H).

$^{13}\text{C}$  NMR (101 MHz,  $\text{CDCl}_3$ )  $\delta$  149.9, 143.3, 131.7, 130.9, 130.8, 130.2, 130.0, 129.3, 125.4, 124.4, 122.9, 122.4, 122.1, 120.4, 119.6, 117.8, 116.8, 116.0, 84.2, 68.0, 45.8, 8.4.

HRMS  $[M + Na]^+$  calculated for  $C_{22}H_{20}N_2NaO_4S^+$  : 431.1036, found: 431.1042.

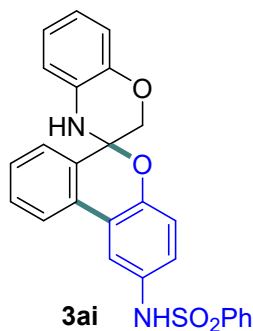

***N*-(2*H*,4*H*-spiro[benzo[*b*][1,4]oxazine-3,6'-benzo[*c*]chromen]-2'-yl)benzenesulfonamide (3ai)**

White solid 21% (19.2 mg), mp: 153 – 154 °C.

$^1H$  NMR (400 MHz,  $CDCl_3$ )  $\delta$  7.78 – 7.74 (m, 2H), 7.66 (d,  $J = 7.7$  Hz, 1H), 7.58 – 7.37 (m, 7H), 6.94 – 6.77 (m, 5H), 6.75 (dd,  $J = 7.7, 1.4$  Hz, 1H), 6.68 (s, 1H), 4.81 (d,  $J = 1.7$  Hz, 1H), 4.31 (dd,  $J = 11.4, 2.4$  Hz, 1H), 3.84 (d,  $J = 11.4$  Hz, 1H).

$^{13}C$  NMR (101 MHz,  $CDCl_3$ )  $\delta$  150.1, 143.3, 139.0, 133.2, 131.6, 130.9, 130.4, 130.1, 130.0, 129.2, 127.4, 125.6, 125.4, 122.8, 122.1, 122.1, 120.4, 119.3, 119.1, 116.7, 115.9, 84.1, 68.0.

HRMS:  $[M + Na]^+$  calculated for  $C_{26}H_{20}N_2NaO_4S^+$  : 479.1036, found: 479.1043.

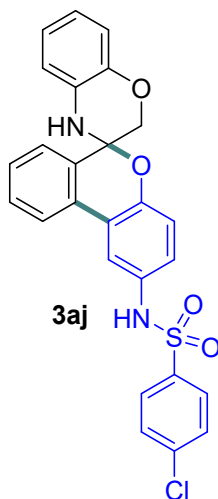

**4-chloro-*N*-(2*H*,4*H*-spiro[benzo[*b*][1,4]oxazine-3,6'-benzo[*c*]chromen]-2'-yl)benzenesulfonamide (3aj)**

White solid 16% (15.7 mg), mp: 125 – 126 °C.

$^1H$  NMR (400 MHz,  $CDCl_3$ )  $\delta$  7.73 – 7.64 (m, 3H), 7.56 (d,  $J = 2.4$  Hz, 1H), 7.55 – 7.46 (m, 2H), 7.45 – 7.38 (m, 3H), 6.94 – 6.85 (m, 3H), 6.85 – 6.78 (m, 2H), 6.76 (dd,  $J = 7.6, 1.3$  Hz, 1H), 6.71 (s, 1H), 4.82 (d,  $J = 2.1$  Hz, 1H), 4.32 (dd,  $J = 11.4, 2.4$  Hz, 1H), 3.85 (d,  $J = 11.4$  Hz, 1H).

$^{13}\text{C}$  NMR (101 MHz,  $\text{CDCl}_3$ )  $\delta$  150.3, 143.3, 139.8, 137.5, 131.6, 130.8, 130.2, 130.0, 129.9, 129.5, 129.3, 128.9, 125.6, 125.5, 122.8, 122.2, 122.2, 120.4, 119.5, 119.2, 116.8, 115.9, 84.2, 68.0.

HRMS:  $[\text{M} + \text{H}]^+$  calculated for  $\text{C}_{26}\text{H}_{20}\text{ClN}_2\text{O}_4\text{S}^+$  : 491.0827, found: 491.0826.

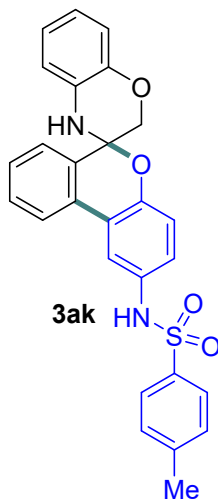

**4-methyl-N-(2H,4H-spiro[benzo[b][1,4]oxazine-3,6'-benzo[c]chromen]-2'-yl)benzenesulfonamide (3ak)**

White solid 22% (20.7 mg), mp: 88–89 °C.

$^1\text{H}$  NMR (400 MHz,  $\text{DMSO}-d_6$ )  $\delta$  7.67 – 7.62 (m, 3H), 7.58 – 7.49 (m, 3H), 7.49 – 7.43 (m, 2H), 7.34 (d,  $J = 8.2$  Hz, 2H), 6.91 (dd,  $J = 8.6, 2.4$  Hz, 1H), 6.81 (s, 1H), 6.80 – 6.76 (m, 3H), 6.67 – 6.62 (m, 1H), 4.18 (dd,  $J = 11.3, 1.9$  Hz, 1H), 3.80 (d,  $J = 11.3$  Hz, 1H), 2.32 (s, 3H).

$^{13}\text{C}$  NMR (101 MHz,  $\text{DMSO}-d_6$ )  $\delta$  148.6, 143.3, 142.4, 136.7, 132.0, 131.8, 131.4, 130.0, 129.7, 129.4, 128.9, 126.9, 125.8, 123.6, 122.1, 121.7, 121.3, 118.6, 118.5, 116.6, 115.9, 115.3, 83.6, 67.3, 21.0.

HRMS:  $[\text{M} + \text{H}]^+$  calculated for  $\text{C}_{27}\text{H}_{23}\text{N}_2\text{O}_4\text{S}^+$  : 471.1373, found: 471.1382.

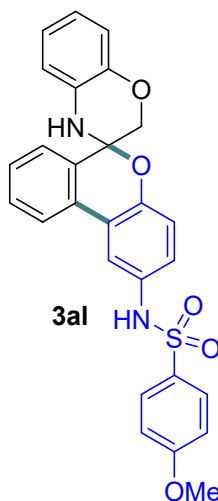

**4-methoxy-*N*-(2*H*,4*H*-spiro[benzo[*b*][1,4]oxazine-3,6'-benzo[*c*]chromen]-2'-yl)benzenesulfonamide (3al)**

White solid 37% (36.0 mg), mp: 180 – 181 °C.

**<sup>1</sup>H NMR** (400 MHz, CDCl<sub>3</sub>) δ 7.72 – 7.66 (m, 3H), 7.58 (d, *J* = 2.4 Hz, 1H), 7.54 – 7.46 (m, 2H), 7.41 (t, *J* = 7.5 Hz, 1H), 6.94 – 6.84 (m, 5H), 6.84 – 6.73 (m, 3H), 6.52 (s, 1H), 4.80 (d, *J* = 2.0 Hz, 1H), 4.32 (dd, *J* = 11.4, 2.3 Hz, 1H), 3.85 (d, *J* = 11.5 Hz, 1H), 3.83 (s, 3H).

**<sup>13</sup>C NMR** (101 MHz, CDCl<sub>3</sub>) δ 163.3, 150.0, 143.3, 131.6, 130.9, 130.7, 130.6, 130.1, 130.1, 129.6, 129.2, 125.5, 125.4, 122.9, 122.1, 122.0, 120.4, 119.3, 119.0, 116.7, 115.9, 114.3, 84.1, 68.0, 55.7.

**HRMS:** [M + Na]<sup>+</sup> calculated for C<sub>27</sub>H<sub>22</sub>N<sub>2</sub>NaO<sub>5</sub>S<sup>+</sup> : 509.1142, found: 509.1140.

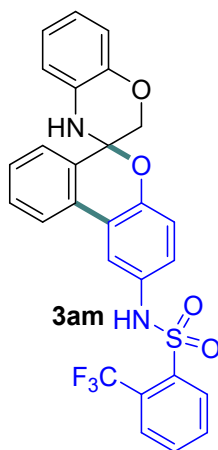

***N*-(2*H*,4*H*-spiro[benzo[*b*][1,4]oxazine-3,6'-benzo[*c*]chromen]-2'-yl)-2-(trifluoromethyl)benzenesulfonamide (3am)**

White solid 26%(27.3 mg), mp: 149 – 150 °C.

**<sup>1</sup>H NMR** (400 MHz, CDCl<sub>3</sub>) δ 7.96 (d, *J* = 7.9 Hz, 1H), 7.89 (d, *J* = 7.8 Hz, 1H), 7.69 – 7.61 (m, 2H), 7.58 – 7.52 (m, 2H), 7.52 – 7.44 (m, 2H), 7.41 – 7.37 (m, 1H), 6.92 – 6.84 (m, 2H), 6.83 – 6.74 (m, 3H), 6.73 (dd, *J* = 7.7, 1.4 Hz, 1H), 6.69 (s, 1H), 4.80 (d, *J* = 1.7 Hz, 1H), 4.26 (dd, *J* = 11.4, 2.3 Hz, 1H), 3.81 (d, *J* = 11.4 Hz, 1H).

**<sup>13</sup>C NMR** (101 MHz, CDCl<sub>3</sub>) δ 150.4, 143.2, 137.4, 133.2, 132.6, 132.4, 131.5, 130.8, 130.2, 129.8, 129.7, 129.3, 128.6 (q, *J* = 6.3 Hz), 127.7 (d, *J* = 32.9 Hz), 125.5, 125.5, 123.2 (d, *J* = 273.9 Hz), 122.8, 122.2, 122.1, 120.4, 119.3, 119.3, 116.7, 115.9, 84.2, 68.0.

**HRMS:** [M + Na]<sup>+</sup> calculated for C<sub>27</sub>H<sub>19</sub>F<sub>3</sub>N<sub>2</sub>NaO<sub>4</sub>S<sup>+</sup> : 547.0910, found: 547.0917.

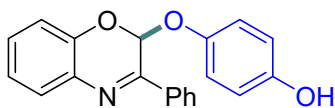

**4aa**

**4-((3-phenyl-2H-benzo[*b*][1,4]oxazin-2-yl)oxy)phenol (4aa)**

Pale yellow solid 50% (31.7 mg), mp: 155 – 156 °C.

<sup>1</sup>H NMR (400 MHz, CDCl<sub>3</sub>) δ 8.06 – 7.93 (m, 2H), 7.63 (dd, *J* = 7.9, 1.6 Hz, 1H), 7.50 – 7.48 (m, 3H), 7.31 – 7.22 (m, 2H), 7.17 – 7.13 (m, 1H), 7.12 – 7.05 (m, 3H), 6.86 – 6.74 (m, 2H), 6.50 (s, 1H), 5.08 (s, 1H).

<sup>13</sup>C NMR (101 MHz, CDCl<sub>3</sub>) δ 153.9, 152.0, 150.4, 143.2, 135.2, 132.9, 131.3, 129.2, 129.0, 128.3, 127.2, 123.2, 119.6, 116.8, 116.4, 90.5.

HRMS: [M + H]<sup>+</sup> calculated for C<sub>20</sub>H<sub>16</sub>NO<sub>3</sub><sup>+</sup> : 318.1125, found: 318.1137.

**References**

1. Sabitha, M. G.; Rao, A. S. *Synth. Commun.* **1987**, *17*, 341.
2. Pelter, A.; Elgendy, S. *Tetrahedron lett.* **1988**, *29*, 677-680
3. (a)Leduc, A. B.; Kerr, M. A. *Eur. J. Org. Chem.* **2007**, *2*, 237-240. (b) Chen, K.; Liu, S.; Wang, D.; Hao, W. J.; Zhou, P.; Tu, S. J.; Jiang, B. *J. Org. Chem.* **2017**, *82*, 11524-11530.
4. Experimental Crystal Structure Determination: (a) CCDC 2302071: 2023, DOI: 10.5517/ccdc.csd.cc2h8hcn. (b) CCDC: 2302201: DOI: 2023, 10.5517/ccdc.csd.cc2h8mkz. (c) CCDC: 2302202, 2023, DOI: 10.5517/ccdc.csd.cc2h8ml0.

**B. Scale-up Reaction.**

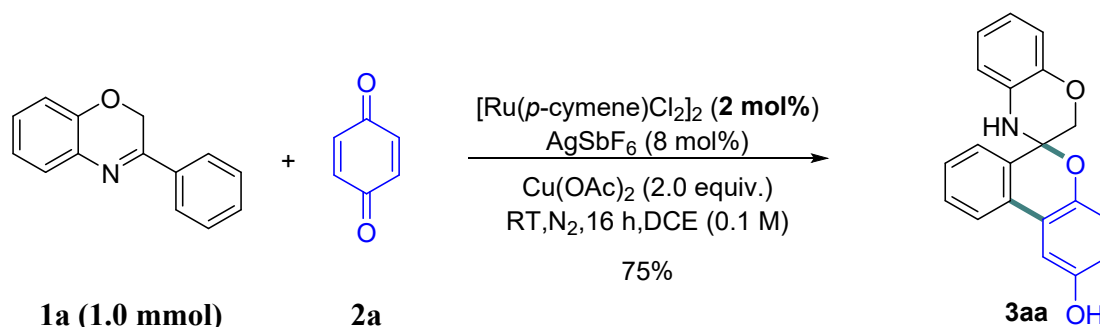

3-phenyl-2H-benzo[*b*][1,4]oxazine (1.0 mmol), benzoquinone (2.2 mmol), [Ru(*p*-cymene)Cl<sub>2</sub>] (2 mol%), AgSbF<sub>6</sub> (8 mol %), Cu(OAc)<sub>2</sub> (2.0 mmol) and DCE (10 mL) were charged into a pressure tube. The reaction mixture was stirred at room temperature for 16 h. After completion of the reaction, the solvent was removed under reduced pressure and the crude reaction mixture was directly purified



through column chromatography on silica gel using PE/EA (15:1) as eluent to obtain 2*H*,4*H*-spiro[benzo[*b*]-[1,4]oxazine-3,6'-benzo[*c*]chromen]-2'-ol (**3aa**) in 75% yield (0.24 g).

### C. Mechanistic studies :

#### (a) H/D exchange.

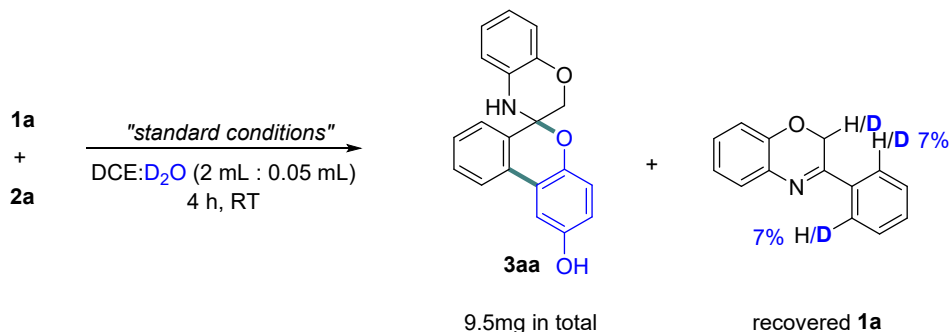

**1a** (0.10 mmol), **2a** (0.22 mmol), [Ru (*p*-cymene)Cl<sub>2</sub>]<sub>2</sub> (4 mol%), AgSbF<sub>6</sub> (16 mol%), Cu(OAc)<sub>2</sub> (0.20 mmol), 50 μL D<sub>2</sub>O and DCE (2.0 mL) were charged into a pressure tube, and the mixture was stirred at room temperature for 4 h. 7% H/D exchange was observed on the basis of <sup>1</sup>H NMR analysis, indicating that the C-H activation was largely irreversible in the catalytic system.

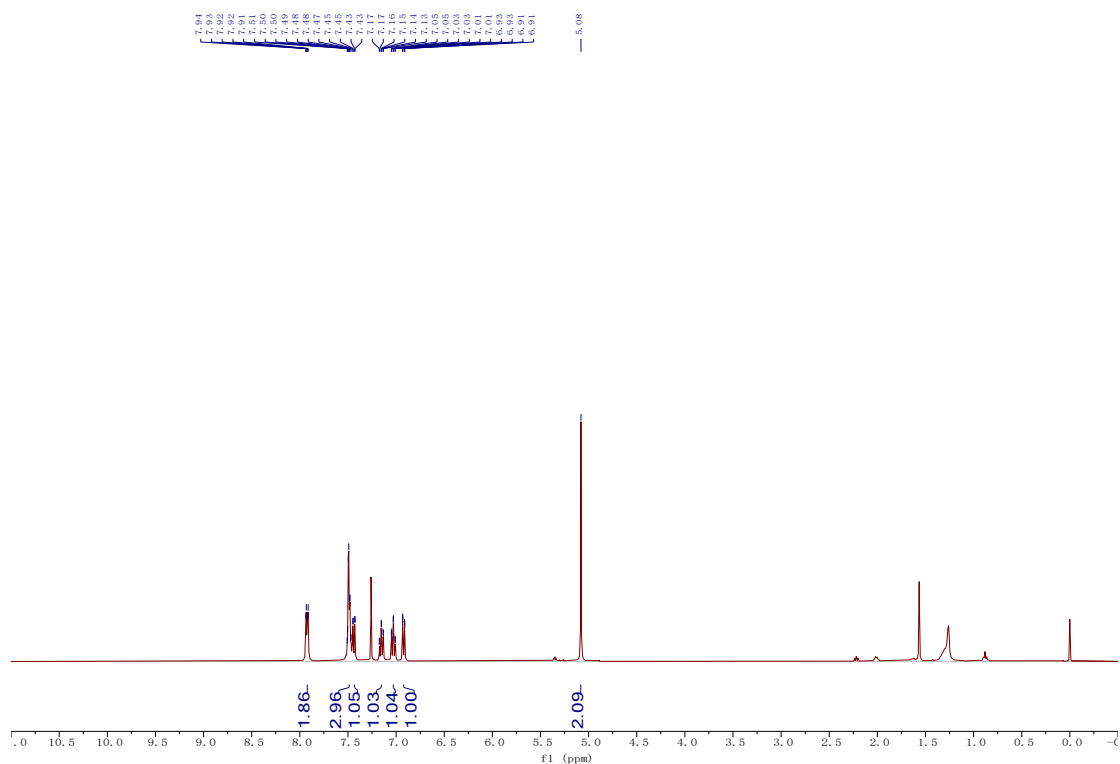

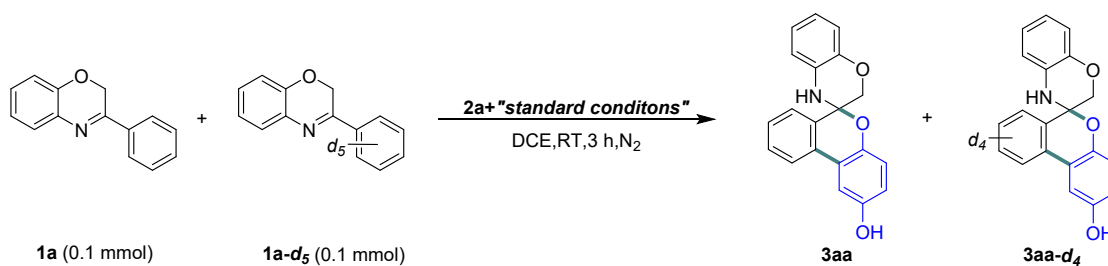

Suspensions of 3-phenyl-2*H*-benzo[*b*][1,4]oxazine  $1\mathbf{a}$  (0.1 mmol) and  $1\mathbf{a-d}_5$  (0.1 mmol),  $2\mathbf{a}$  (0.44 mmol),  $[\text{RuCl}_2(p\text{-cymene})]_2$  (4 mol%),  $\text{AgSbF}_6$  (16 mol%),  $\text{Cu}(\text{OAc})_2$  (0.40 mmol) and DCE (2.0 mL) were stirred side-by-side at room temperature for 3 h under  $\text{N}_2$ . The reaction were removed under reduced pressure. The residue was purified by silica gel chromatography with 26.3 mg of  $3\mathbf{aa}$  and  $3\mathbf{aa-d}_4$  were recovered. KIE value ( $k_{\text{H}}/k_{\text{D}} = 1.5:1$ ) was determined on the basis of  $^1\text{H}$  NMR analysis of  $3\mathbf{aa}$  and  $3\mathbf{aa-d}_4$ .

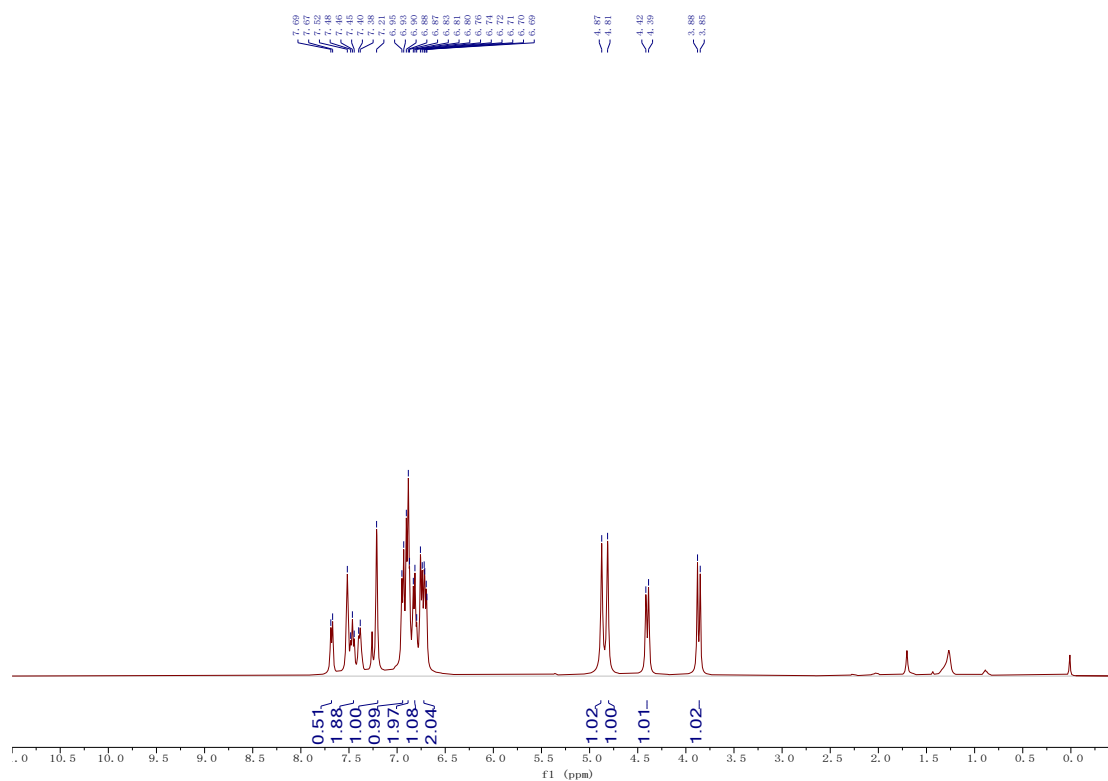

**(c) Procedure for competitive experiment between Benzoquinone**

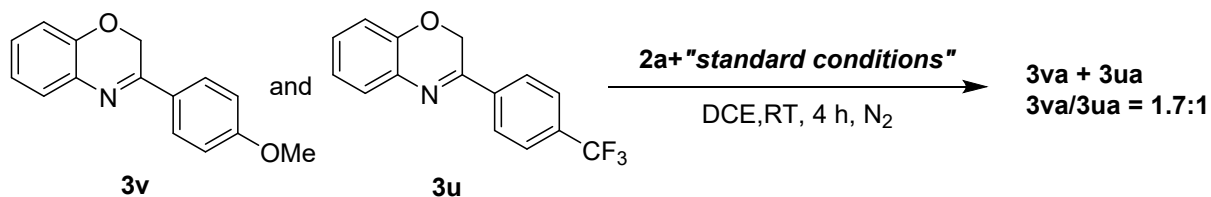

Suspensions of 3-(4-methoxyphenyl)-2*H*-benzo[*b*][1,4]oxazine **3v** (0.1 mmol) and 3-(4-(trifluoromethyl)phenyl)-2*H*-benzo[*b*][1,4]oxazine **3u** (0.1 mmol), **2a** (0.44 mmol), [RuCl<sub>2</sub>(*p*-cymene)]<sub>2</sub> (4 mol%), AgSbF<sub>6</sub> (16 mol%), Cu(OAc)<sub>2</sub> (0.40 mmol) and DCE (2.0 mL) were stirred side-by-side at room temperature for 4 h under N<sub>2</sub>. The reaction were removed under reduced pressure. The residue was purified by silica gel chromatography. The ratio of 3va and 3ua (1 : 0.6) was determined on the basis of <sup>1</sup>H NMR analysis of **3va** and **3ua**.

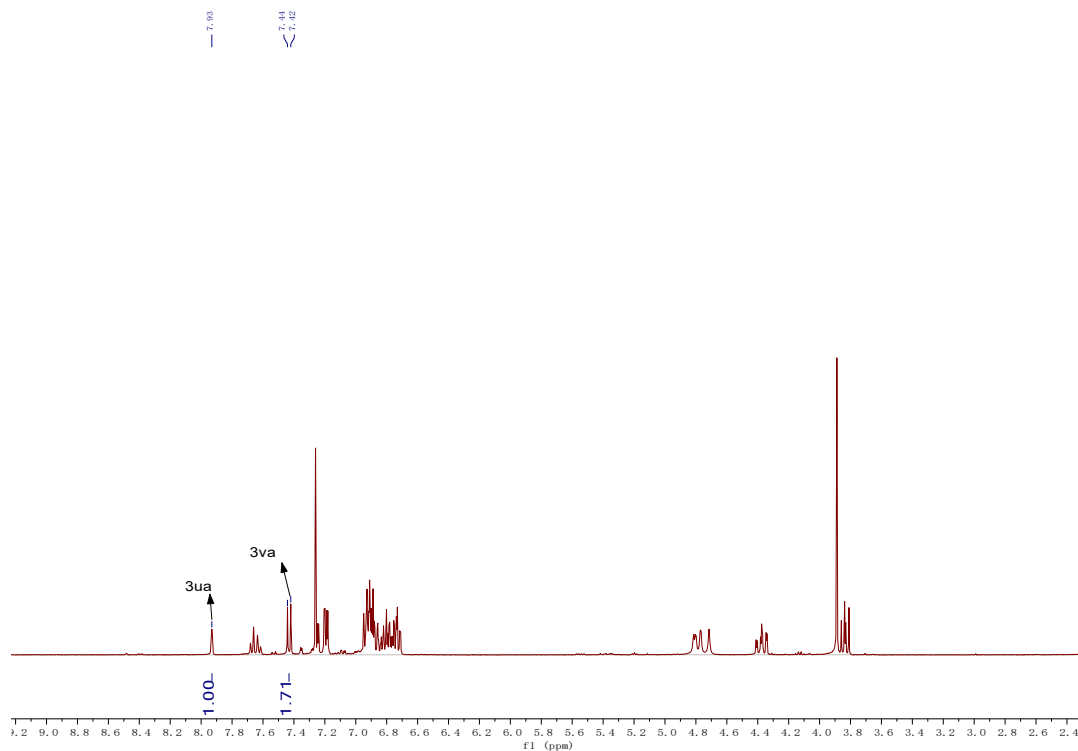

#### D. Crystal structure.

(a) Crystal structure of complex **A'**, CCDC Number = 2302201

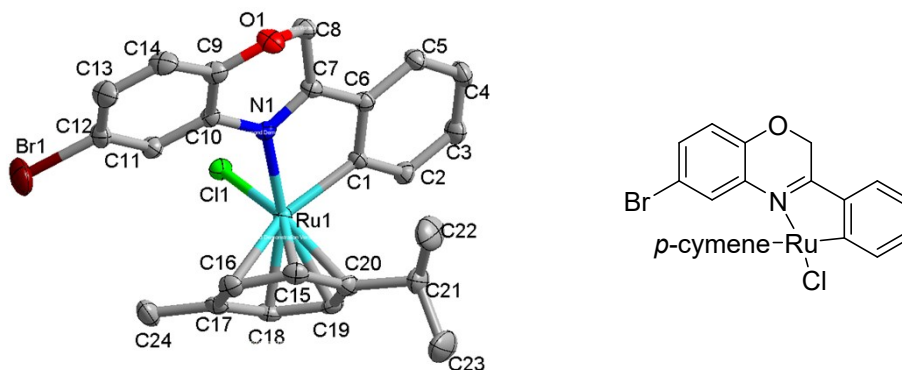



(b) Crystal structure of 3ag, CCDC Number = 2302071

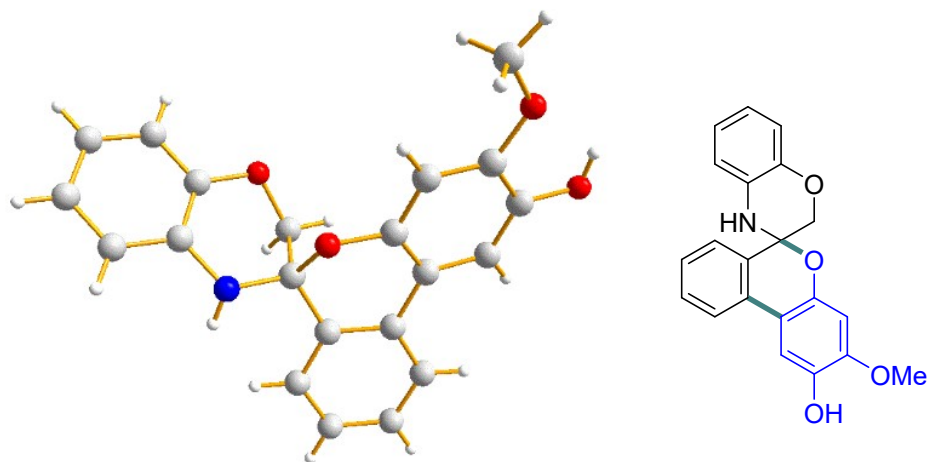

Figure S2 Crystal structure of 3db with thermal ellipsoids at 50% probability.

no syntax errors found. [View dictionary](#) [Interpreting this report](#)

**Datablock: exp\_11188**

---

|                        |                                            |                         |                          |
|------------------------|--------------------------------------------|-------------------------|--------------------------|
| Bond precision:        | C-C = 0.0050 Å                             | Wavelength=0.71073      |                          |
| Cell:                  | a=6.8063 (9)<br>alpha=90                   | b=14.985 (2)<br>beta=90 | c=17.161 (3)<br>gamma=90 |
| Temperature:           | 293 K                                      |                         |                          |
|                        | Calculated                                 | Reported                |                          |
| Volume                 | 1750.3 (4)                                 | 1750.4 (4)              |                          |
| Space group            | P 21/c                                     | P 1 21/c 1              |                          |
| Hall group             | -P 2ybc                                    | -P 2ybc                 |                          |
| Moiety formula         | C21 H17 N O4                               | C21 H17 N O4            |                          |
| Sum formula            | C21 H17 N O4                               | C21 H17 N O4            |                          |
| Mr                     | 347.36                                     | 347.36                  |                          |
| Dx, g cm <sup>-3</sup> | 1.318                                      | 1.318                   |                          |
| Z                      | 4                                          | 4                       |                          |
| Mu (mm <sup>-1</sup> ) | 0.092                                      | 0.092                   |                          |
| F000                   | 728.0                                      | 728.0                   |                          |
| F000'                  | 728.37                                     |                         |                          |
| h, k, lmax             | 9, 20, 23                                  | 9, 20, 23               |                          |
| Nref                   | 4869                                       | 4126                    |                          |
| Tmin, Tmax             | 0.957, 0.973                               | 0.966, 1.000            |                          |
| Tmin'                  | 0.929                                      |                         |                          |
| Correction method=     | # Reported T Limits: Tmin=0.966 Tmax=1.000 |                         |                          |
| AbsCorr =              | MULTI-SCAN                                 |                         |                          |
| Data completeness=     | 0.847                                      | Theta(max)=             | 29.468                   |
| R(reflections)=        | 0.0759( 1969)                              | WR2(reflections)=       | 0.2049( 4126)            |
| S =                    | 1.038                                      | Npar=                   | 237                      |

---

(c) Crystal structure of 3ah, CCDC Number = 2302202

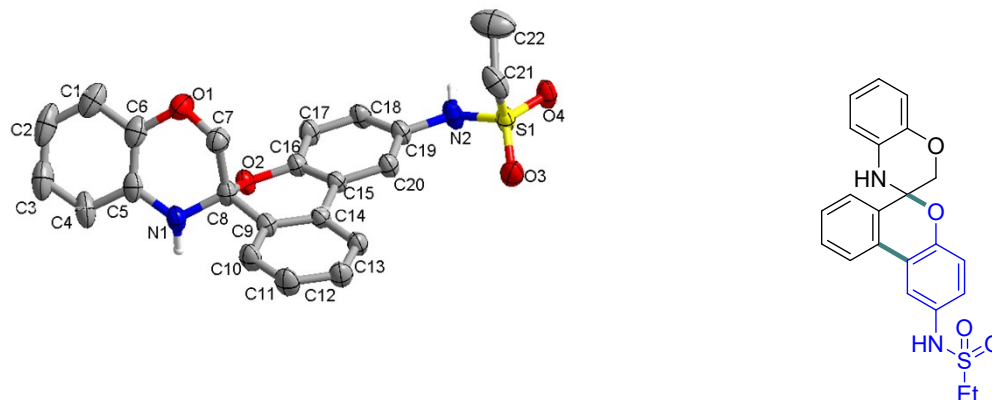

Figure S3 Crystal structure of 3db with thermal ellipsoids at 50% probability.

---

|                               |                                          |                                  |                                    |
|-------------------------------|------------------------------------------|----------------------------------|------------------------------------|
| Bond precision:               | C-C = 0.0054 Å                           | Wavelength=1.54184               |                                    |
| Cell:                         | a=9.6568 (6)<br>alpha=87.571 (6)         | b=10.2090 (6)<br>beta=71.911 (7) | c=13.0889 (11)<br>gamma=80.248 (5) |
| Temperature:                  | 293 K                                    |                                  |                                    |
|                               | Calculated                               | Reported                         |                                    |
| Volume                        | 1208.81 (15)                             | 1208.82 (16)                     |                                    |
| Space group                   | P -1                                     | P -1                             |                                    |
| Hall group                    | -P 1                                     | -P 1                             |                                    |
| Moiety formula                | C22 H20 N2 O4 S [+ solvent]              | C22 H20 N2 O4 S                  |                                    |
| Sum formula                   | C22 H20 N2 O4 S [+ solvent]              | C22 H20 N2 O4 S                  |                                    |
| Mr                            | 408.46                                   | 408.46                           |                                    |
| Dx, g cm <sup>-3</sup>        | 1.122                                    | 1.122                            |                                    |
| Z                             | 2                                        | 2                                |                                    |
| Mu (mm <sup>-1</sup> )        | 1.410                                    | 1.410                            |                                    |
| F000                          | 428.0                                    | 428.0                            |                                    |
| F000'                         | 429.92                                   |                                  |                                    |
| h, k, lmax                    | 11, 12, 15                               | 11, 12, 15                       |                                    |
| Nref                          | 4321                                     | 4320                             |                                    |
| Tmin, Tmax                    | 0.803, 0.868                             | 0.924, 1.000                     |                                    |
| Tmin'                         | 0.787                                    |                                  |                                    |
| Correction method= #          | Reported T Limits: Tmin=0.924 Tmax=1.000 |                                  |                                    |
| AbsCorr = MULTI-SCAN          |                                          |                                  |                                    |
| Data completeness= 1.000      | Theta(max)= 67.075                       |                                  |                                    |
| R(reflections)= 0.0587( 2985) |                                          | wR2(reflections)= 0.1920( 4320)  |                                    |
| S = 0.992                     | Npar= 271                                |                                  |                                    |

---

### E. NMR spectra :

#### <sup>1</sup>H and <sup>13</sup>C NMR Spectra of compound A

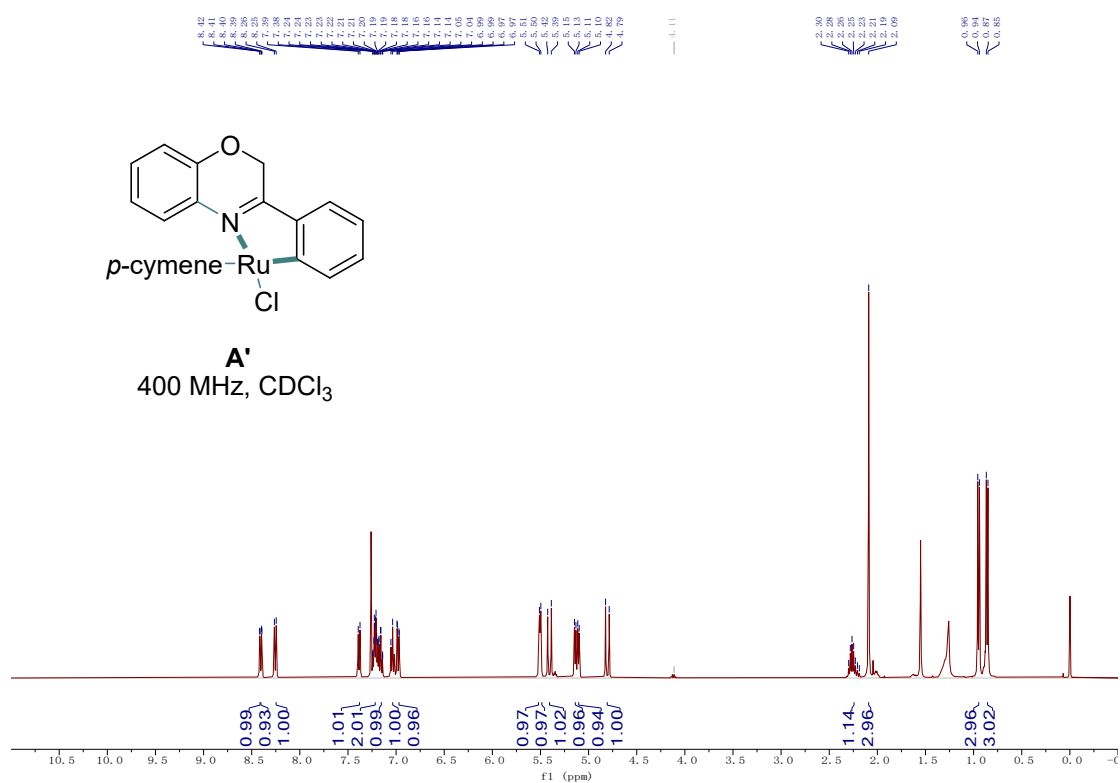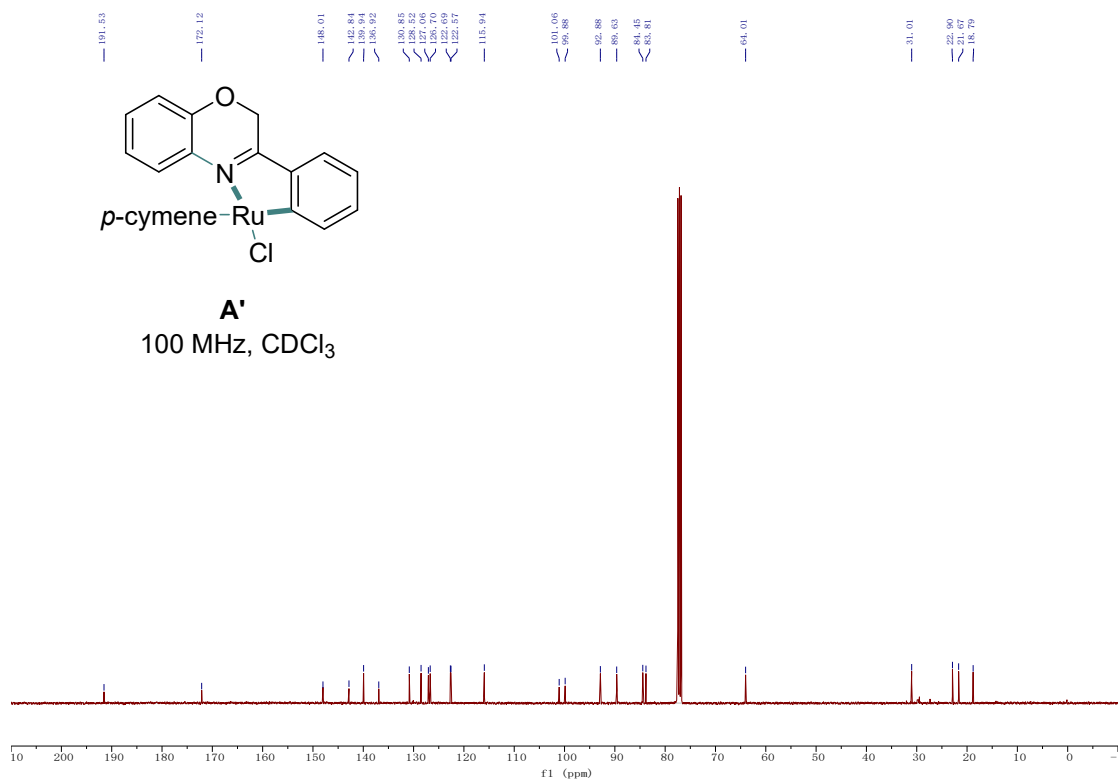

# <sup>1</sup>H and <sup>13</sup>C NMR Spectra of compound B

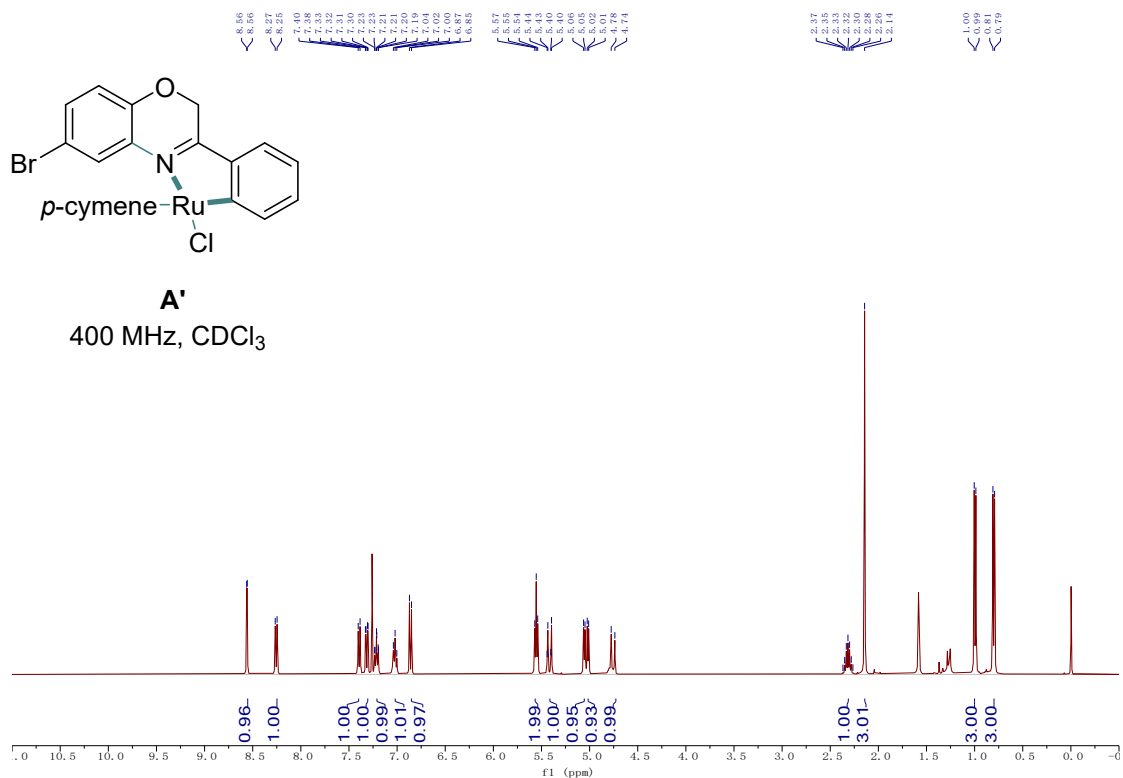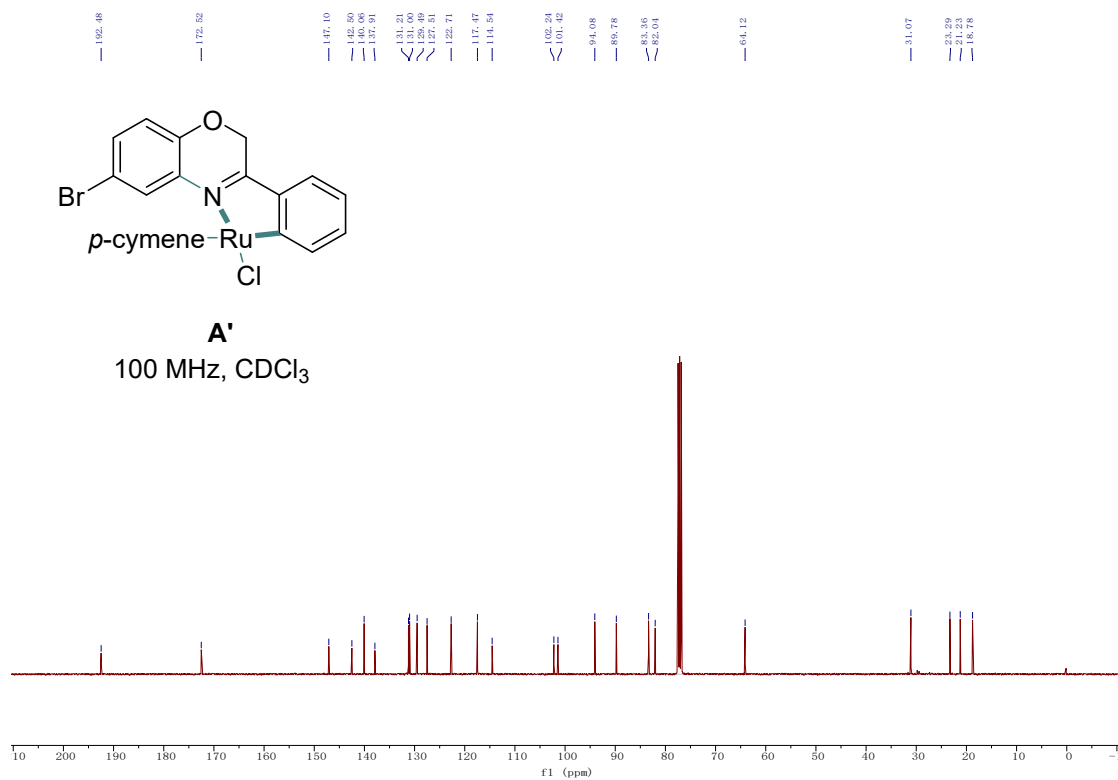



# <sup>1</sup>H and <sup>13</sup>C NMR Spectra of 3aa

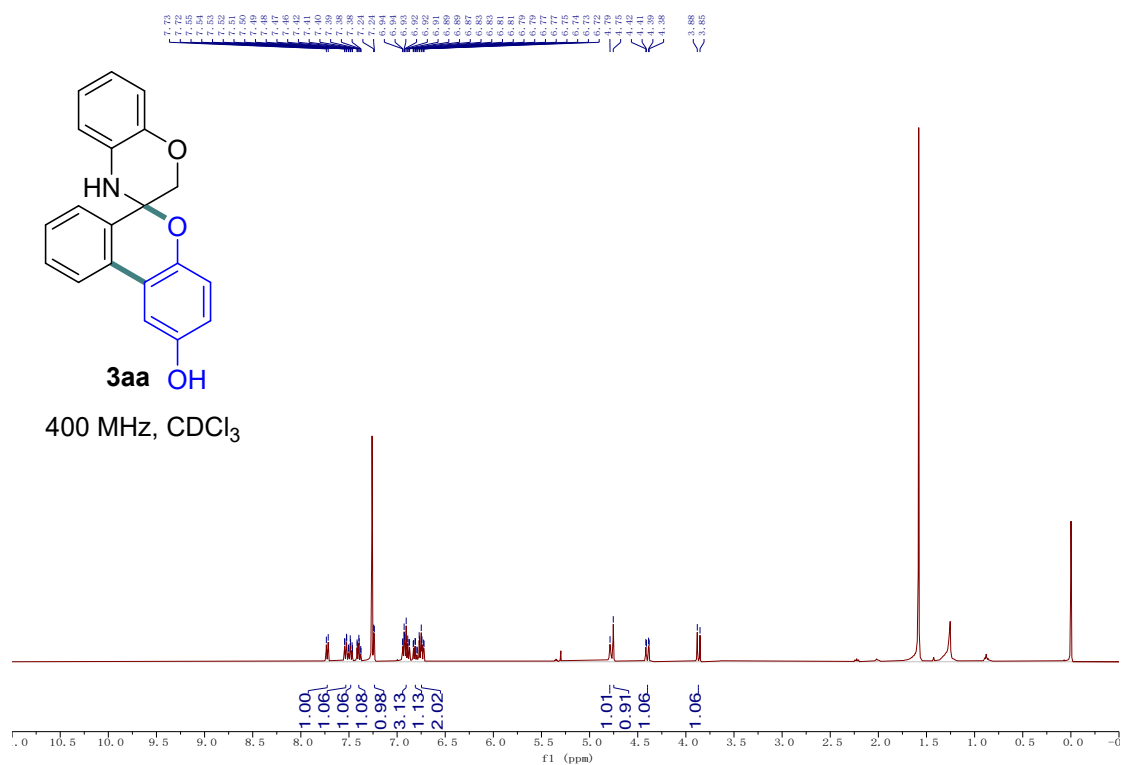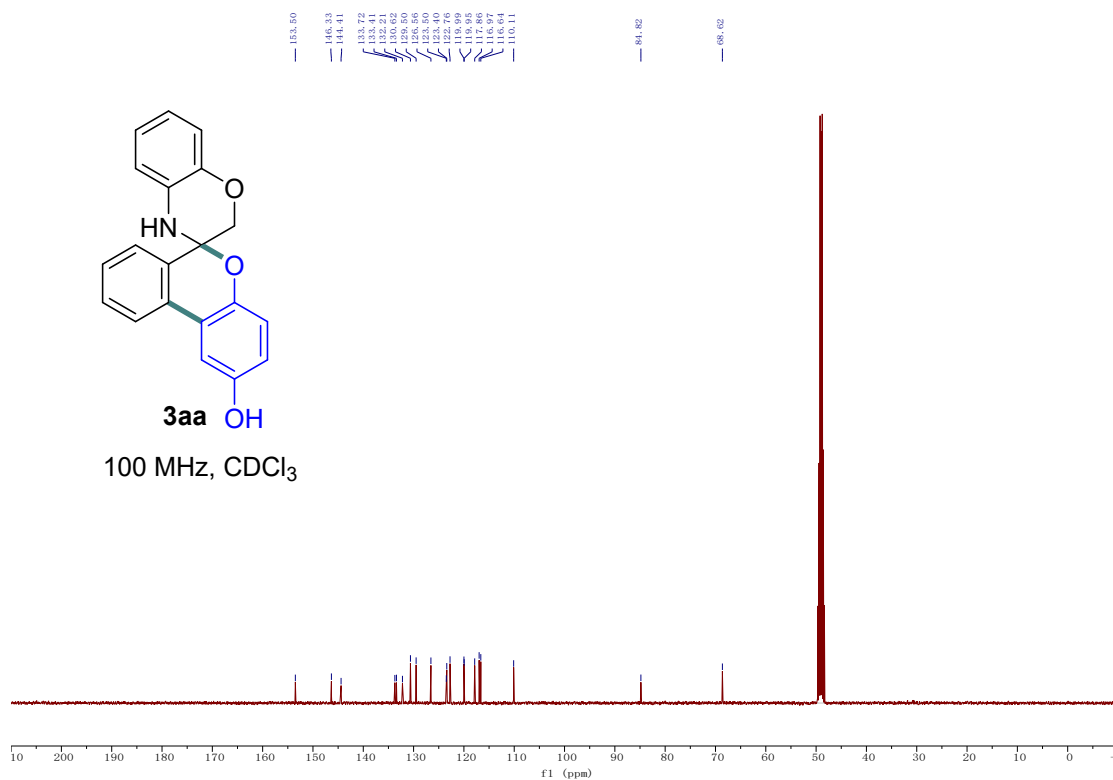

# <sup>1</sup>H and <sup>13</sup>C NMR Spectra of 3ba

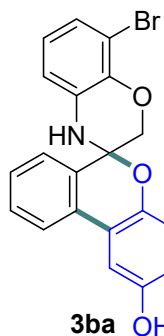

400 MHz, CDCl<sub>3</sub>

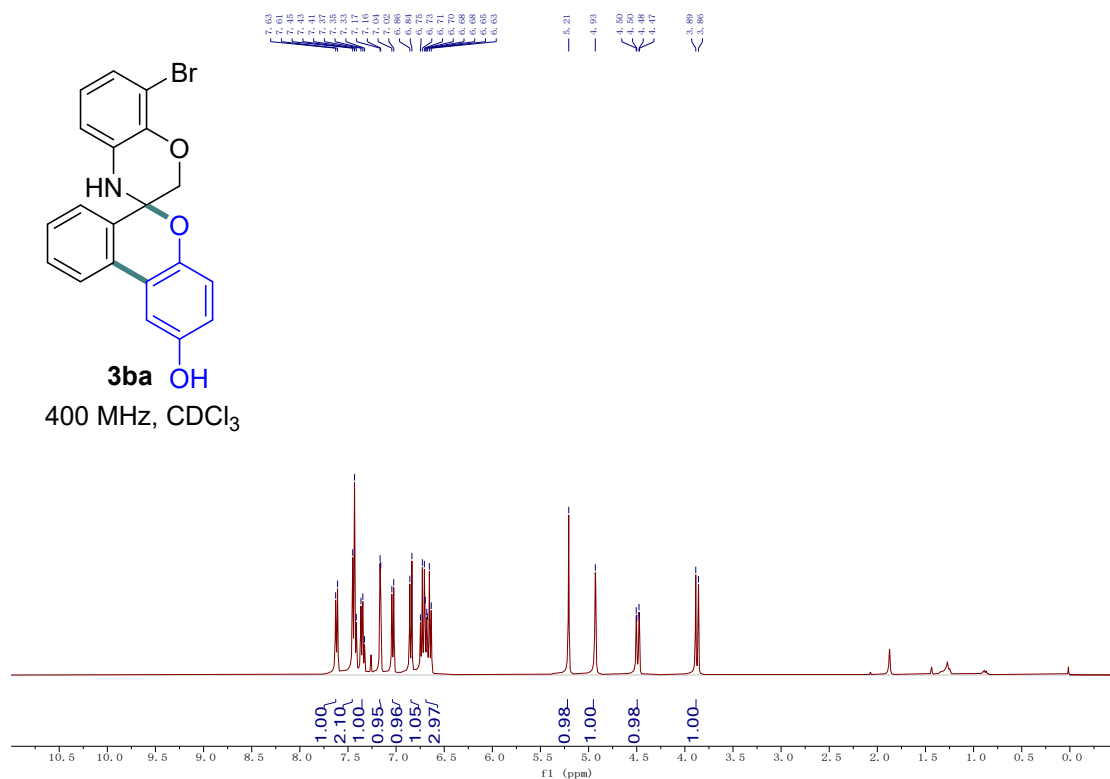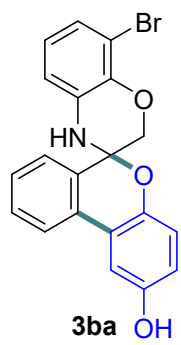

100 MHz, CDCl<sub>3</sub>

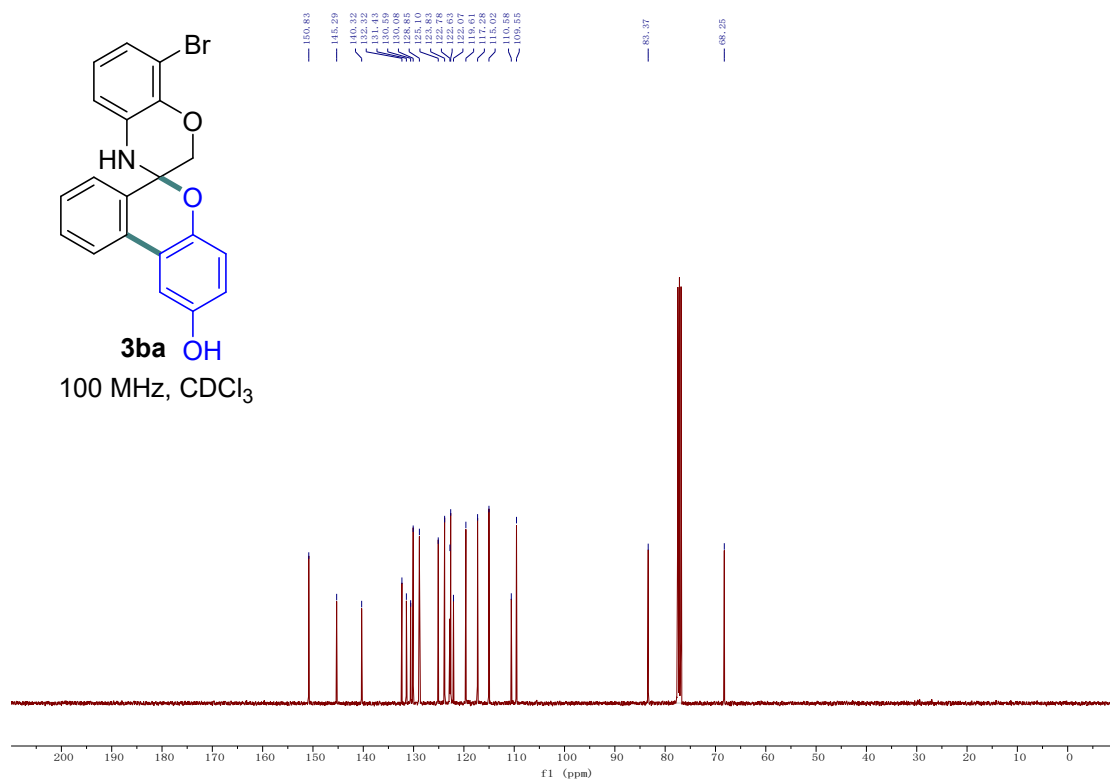



# <sup>1</sup>H and <sup>13</sup>C NMR Spectra of 3da

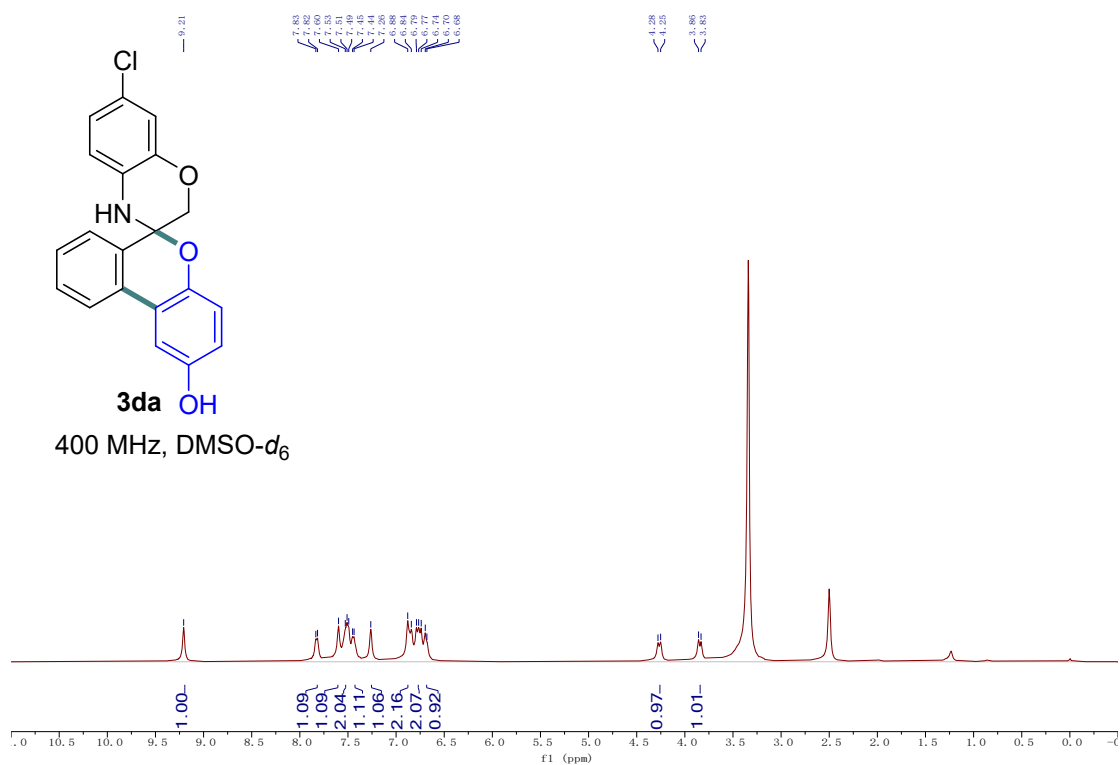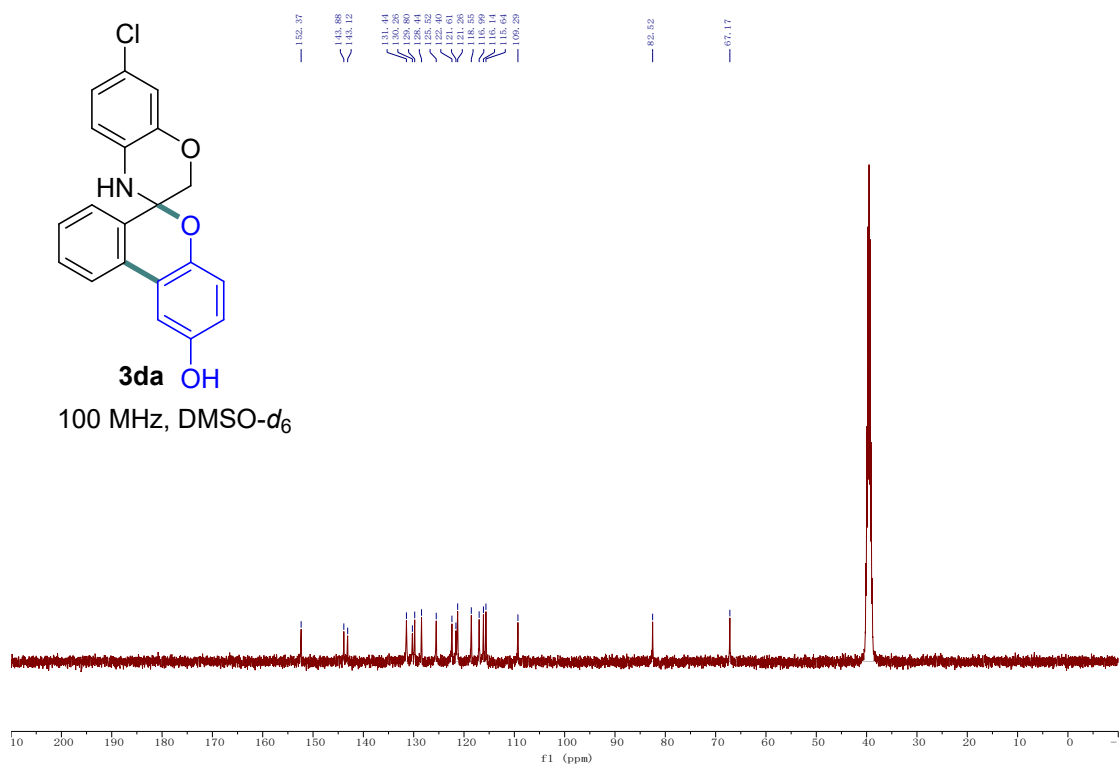

# <sup>1</sup>H and <sup>13</sup>C NMR Spectra of 3ea

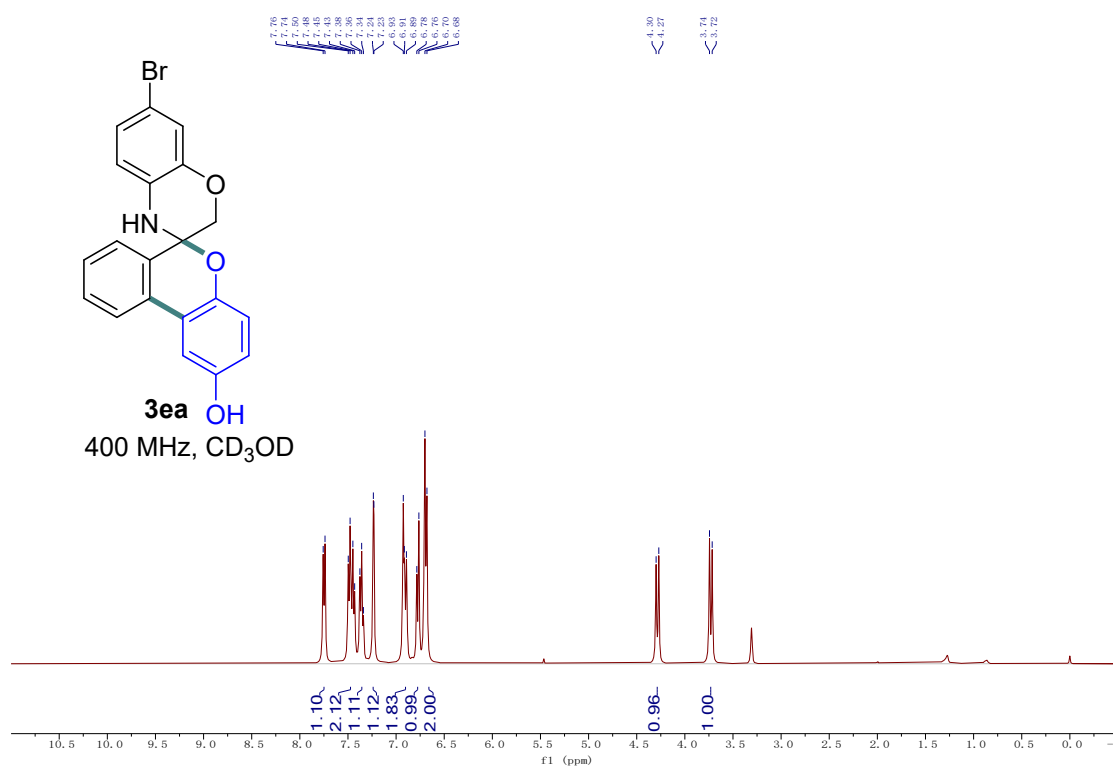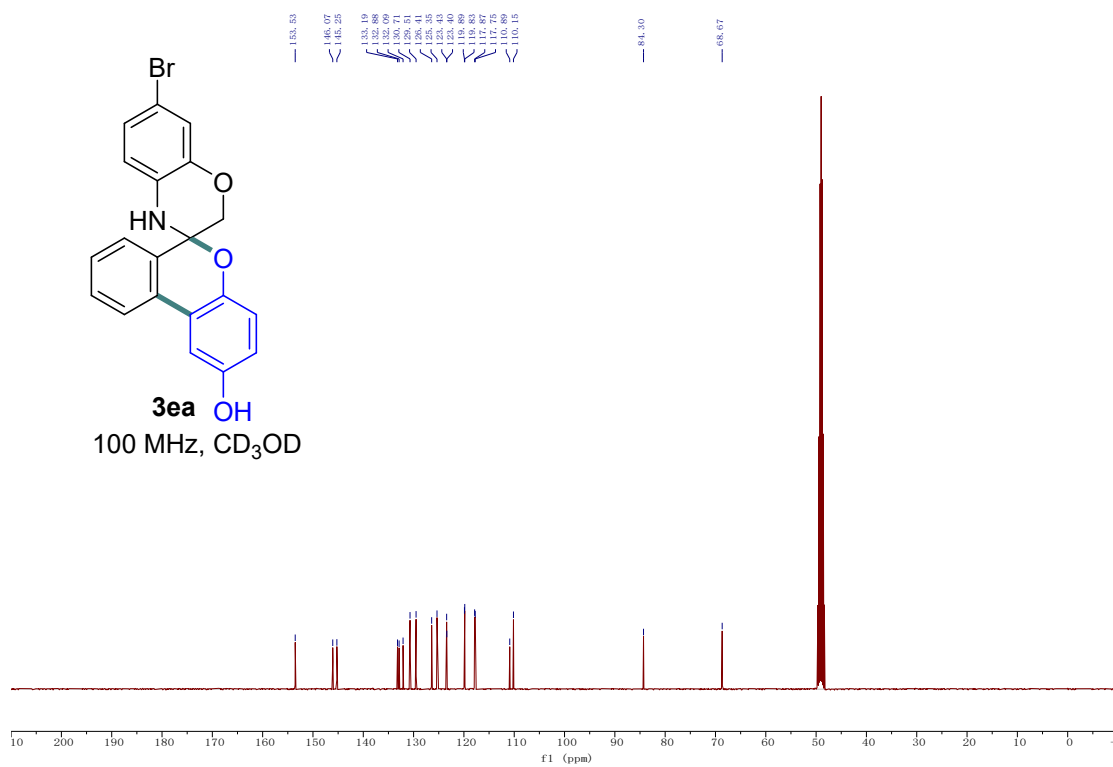

# <sup>1</sup>H and <sup>13</sup>C NMR Spectra of 3fa

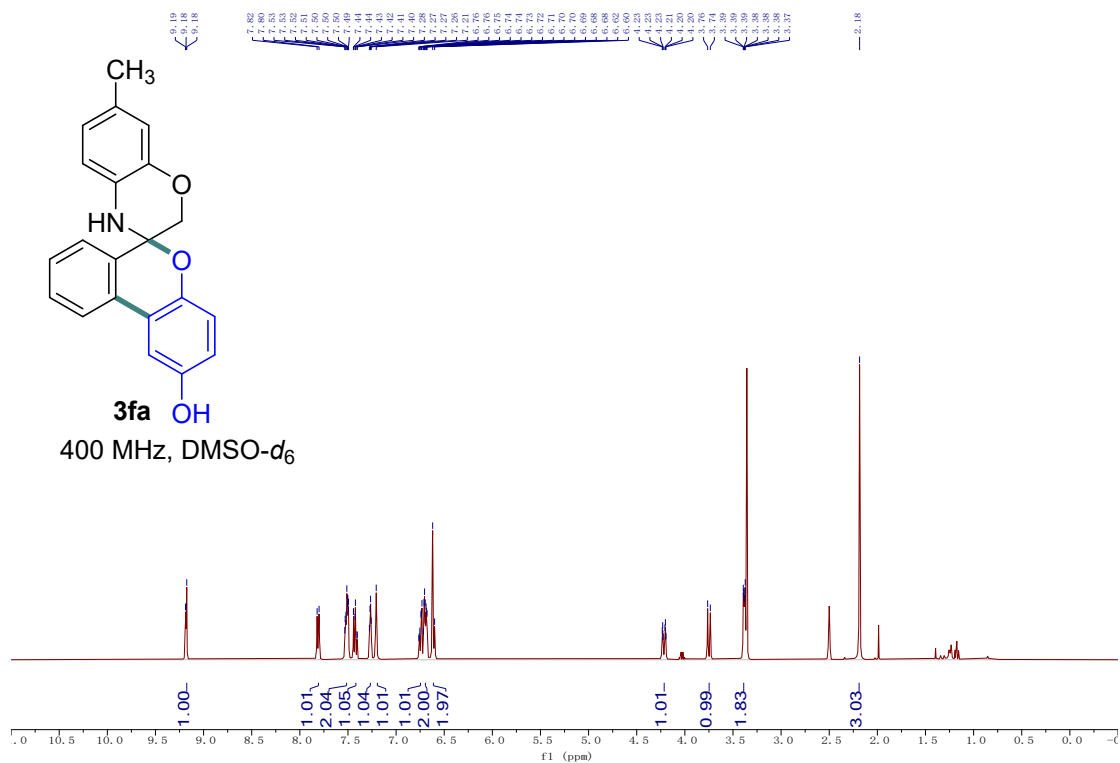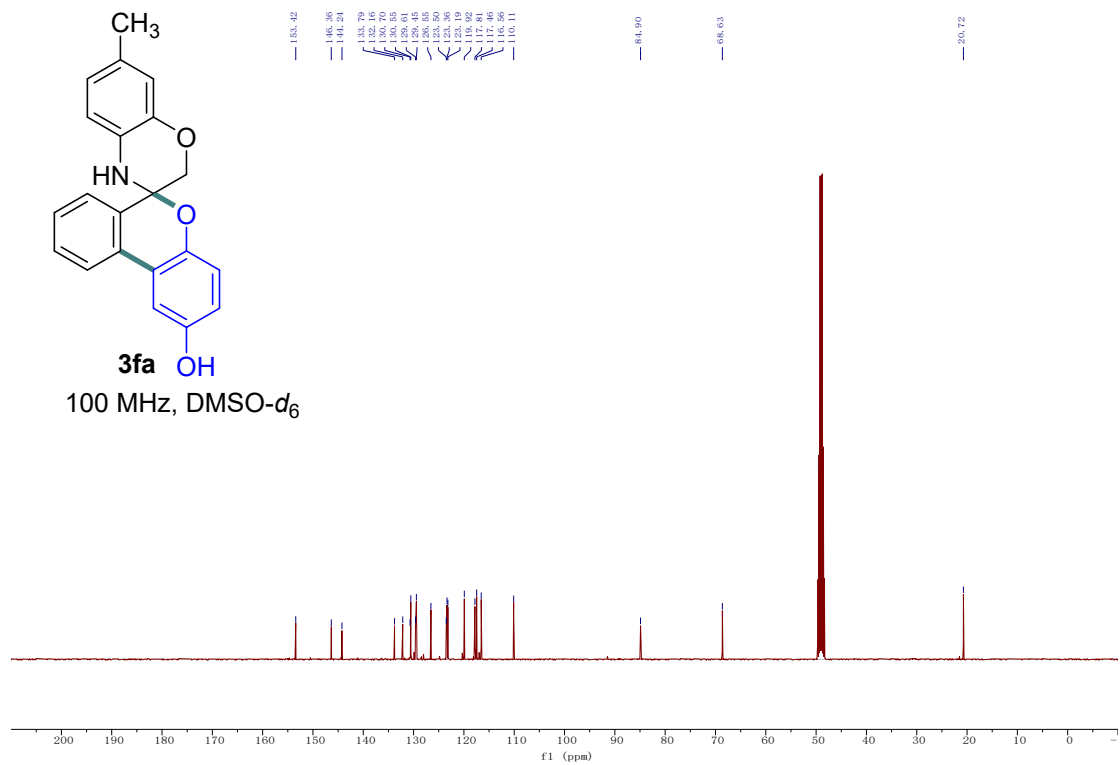

# <sup>1</sup>H and <sup>13</sup>C NMR Spectra of 3ga

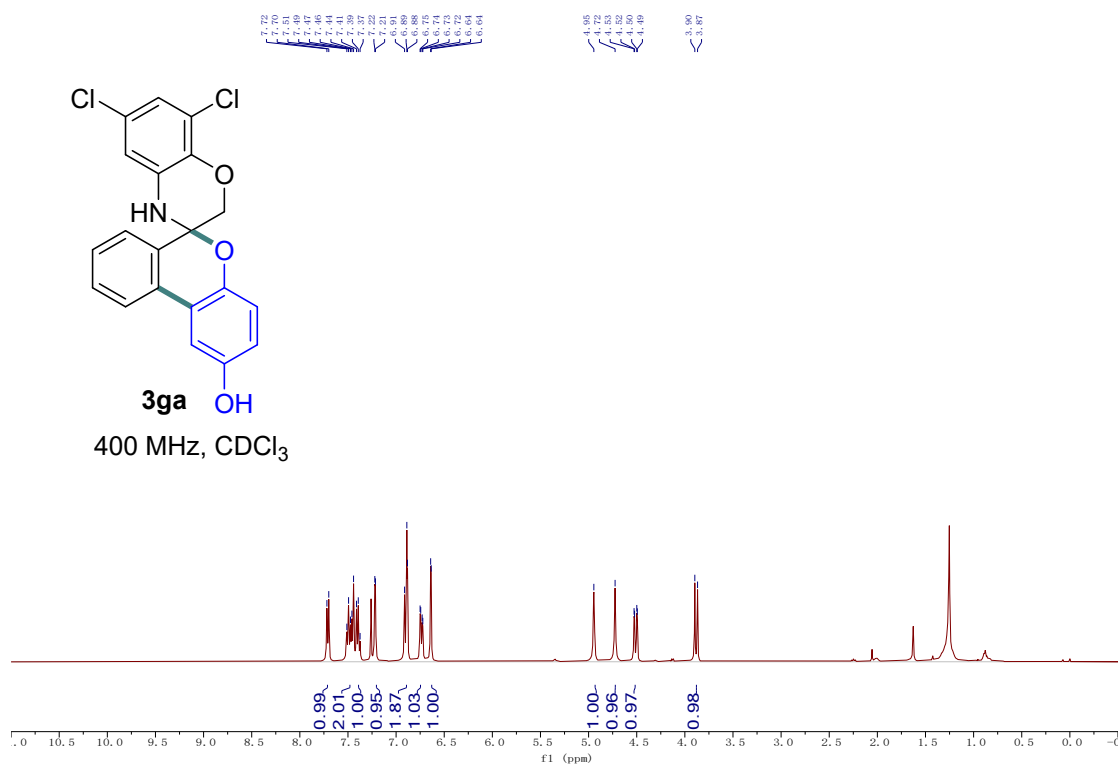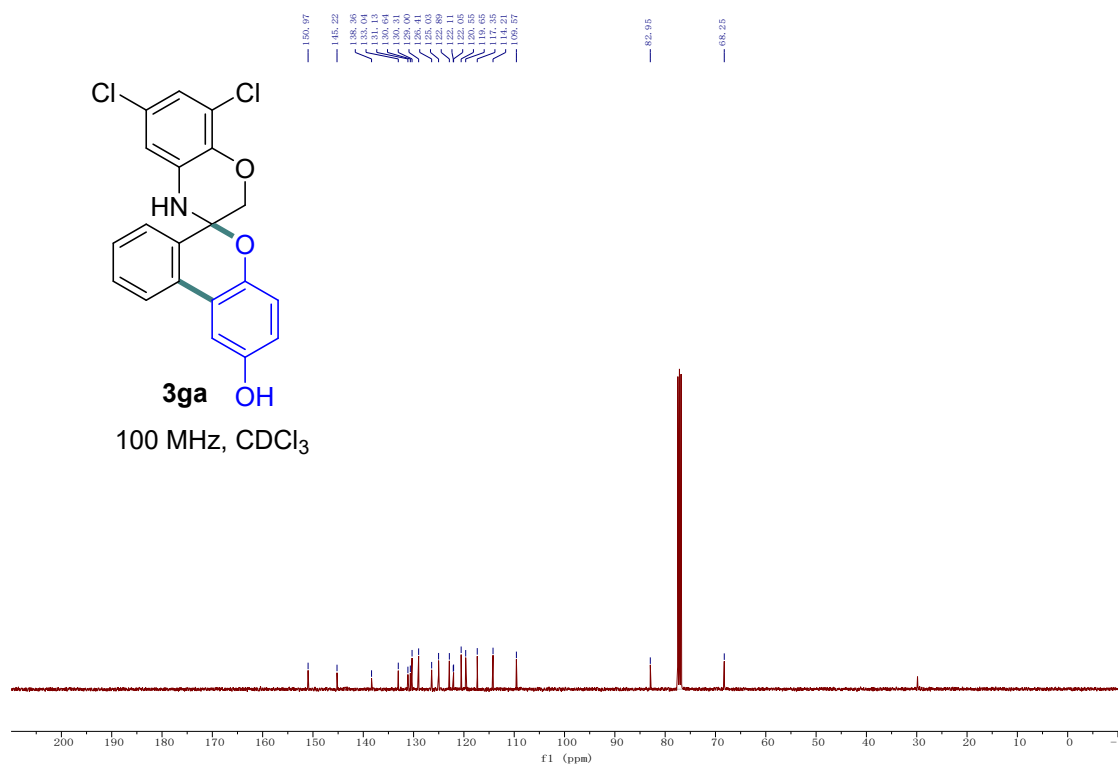

# <sup>1</sup>H and <sup>13</sup>C NMR Spectra of 3ha

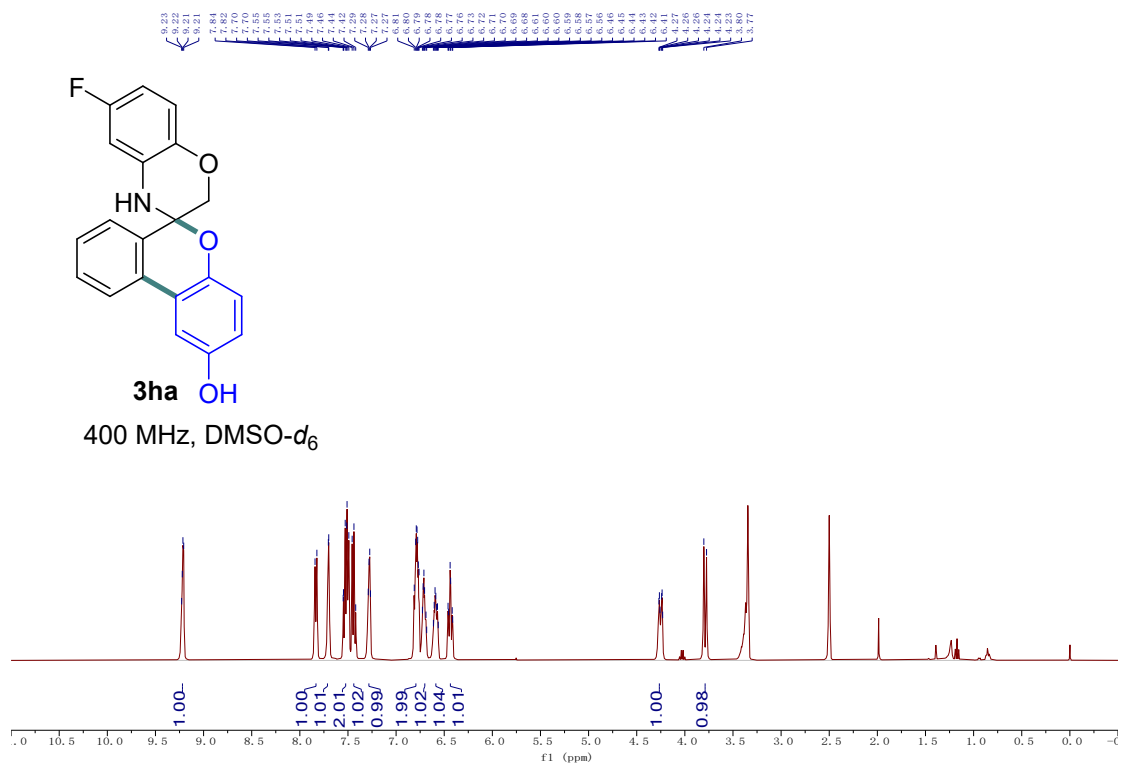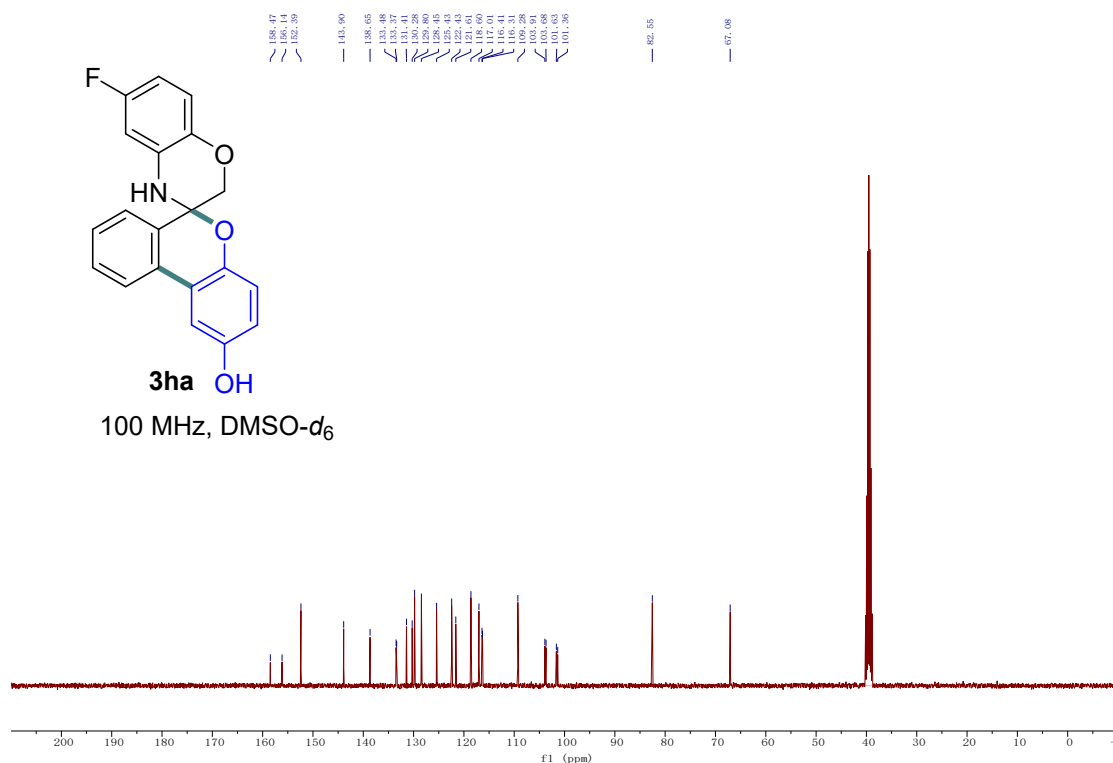





# <sup>1</sup>H and <sup>13</sup>C NMR Spectra of 3ja

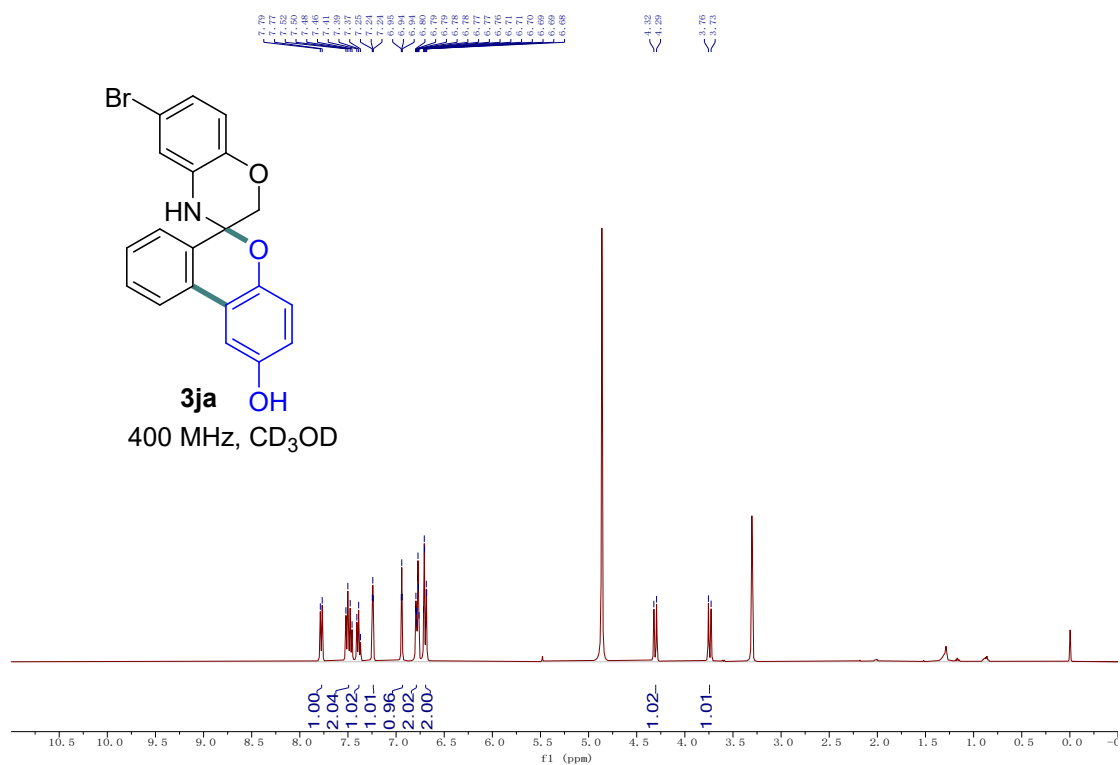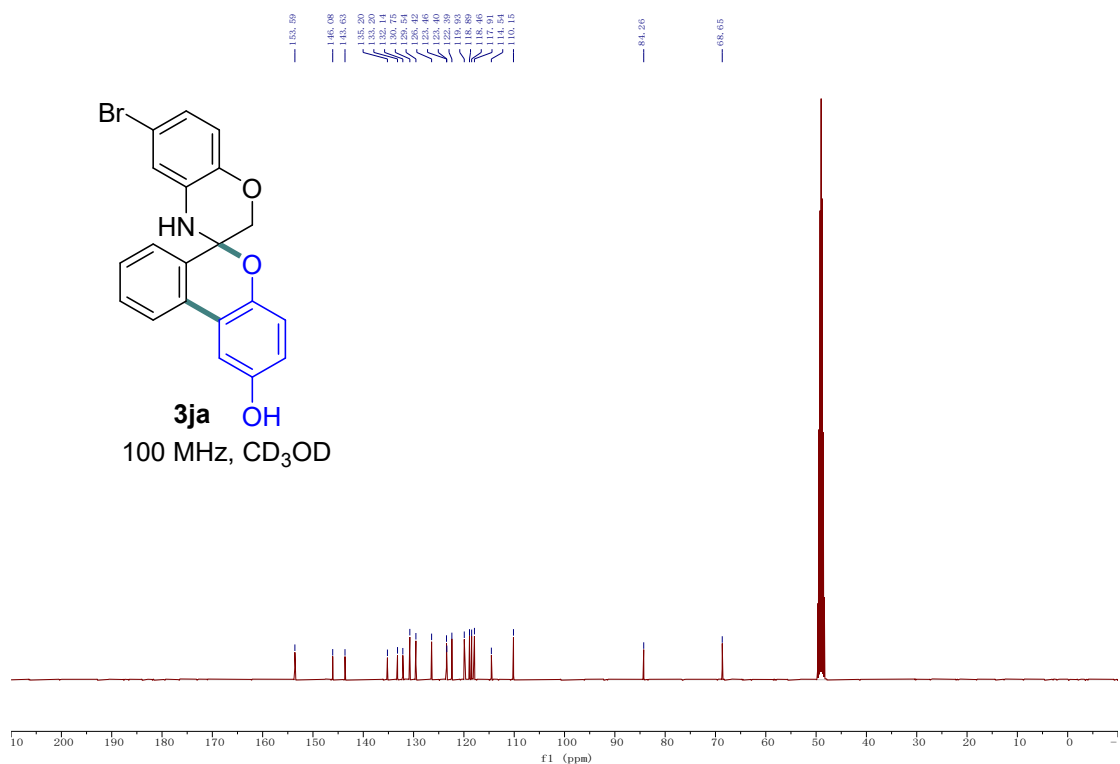

# <sup>1</sup>H and <sup>13</sup>C NMR Spectra of 3ka

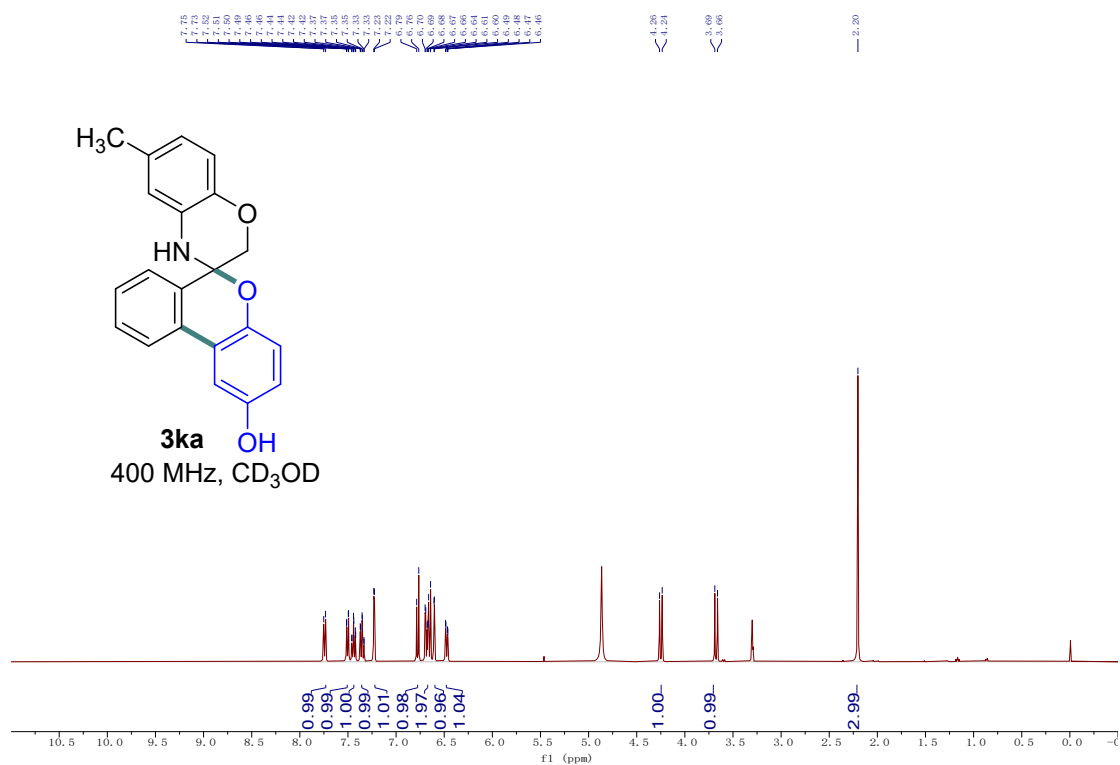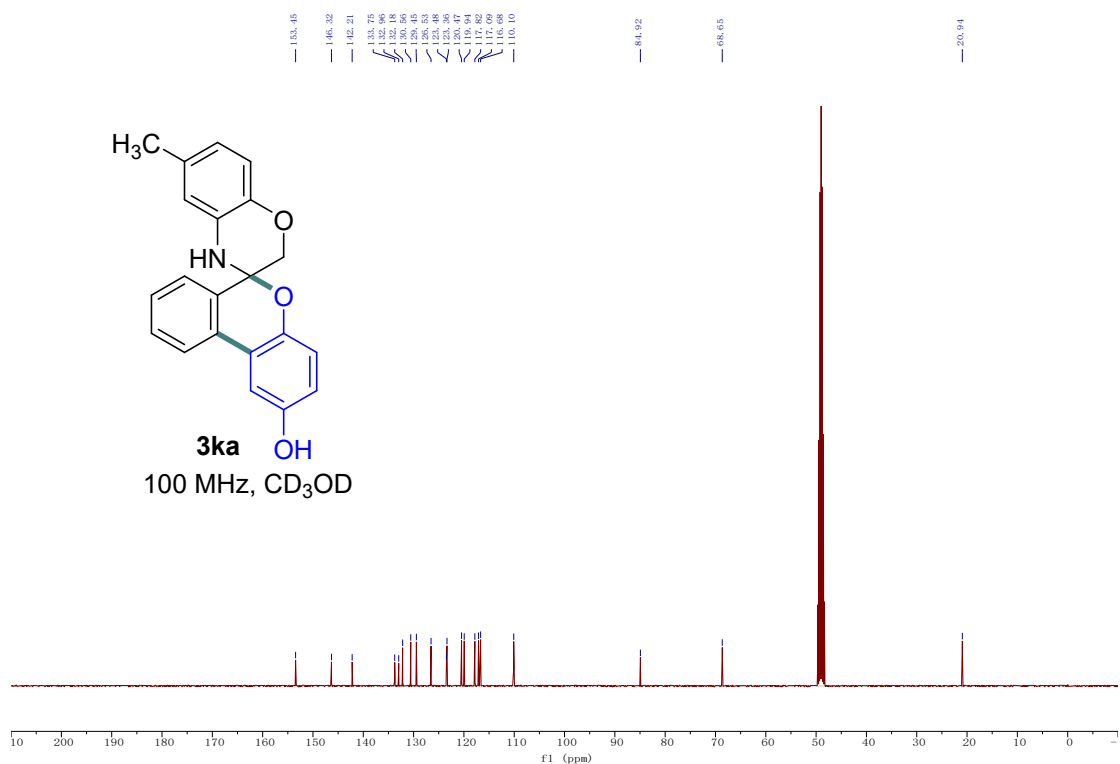

# <sup>1</sup>H and <sup>13</sup>C NMR Spectra of 3la

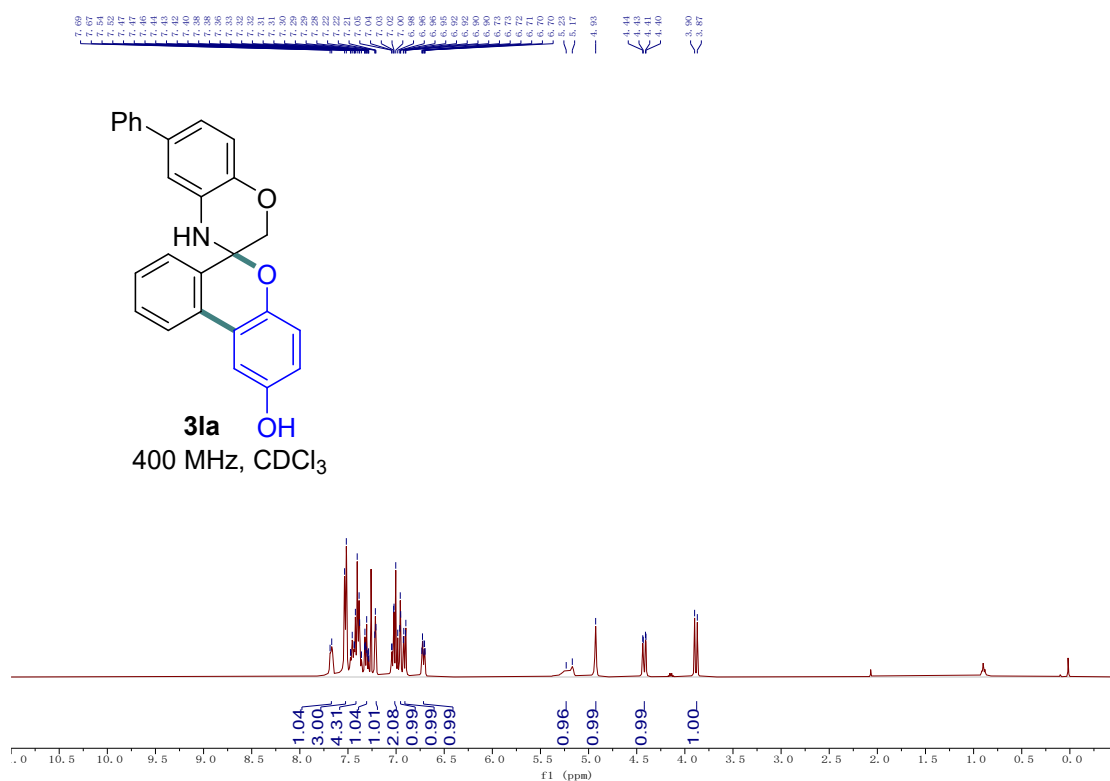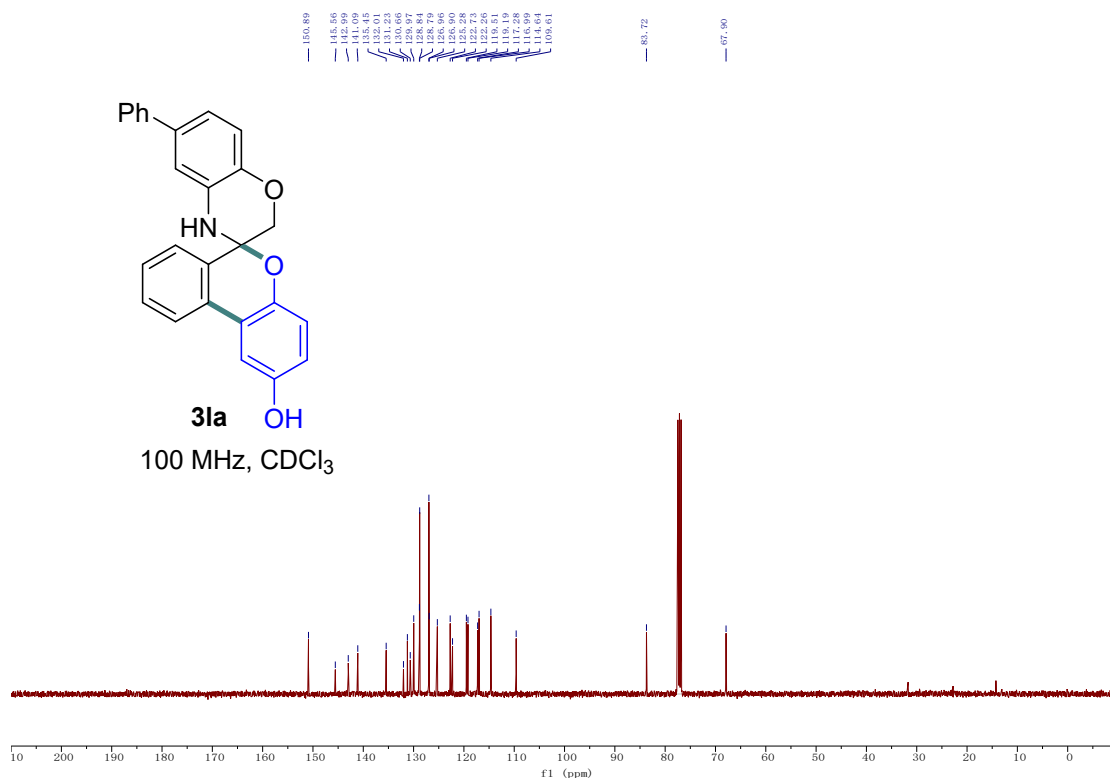

# <sup>1</sup>H and <sup>13</sup>C NMR Spectra of **3ma**

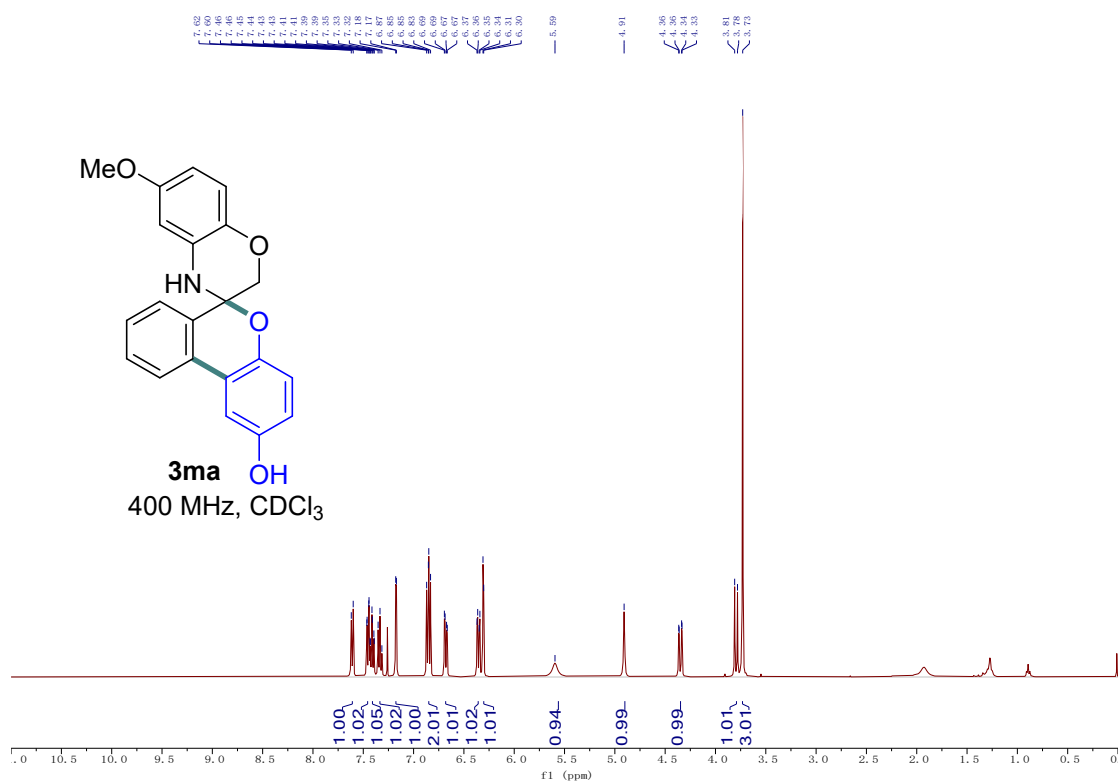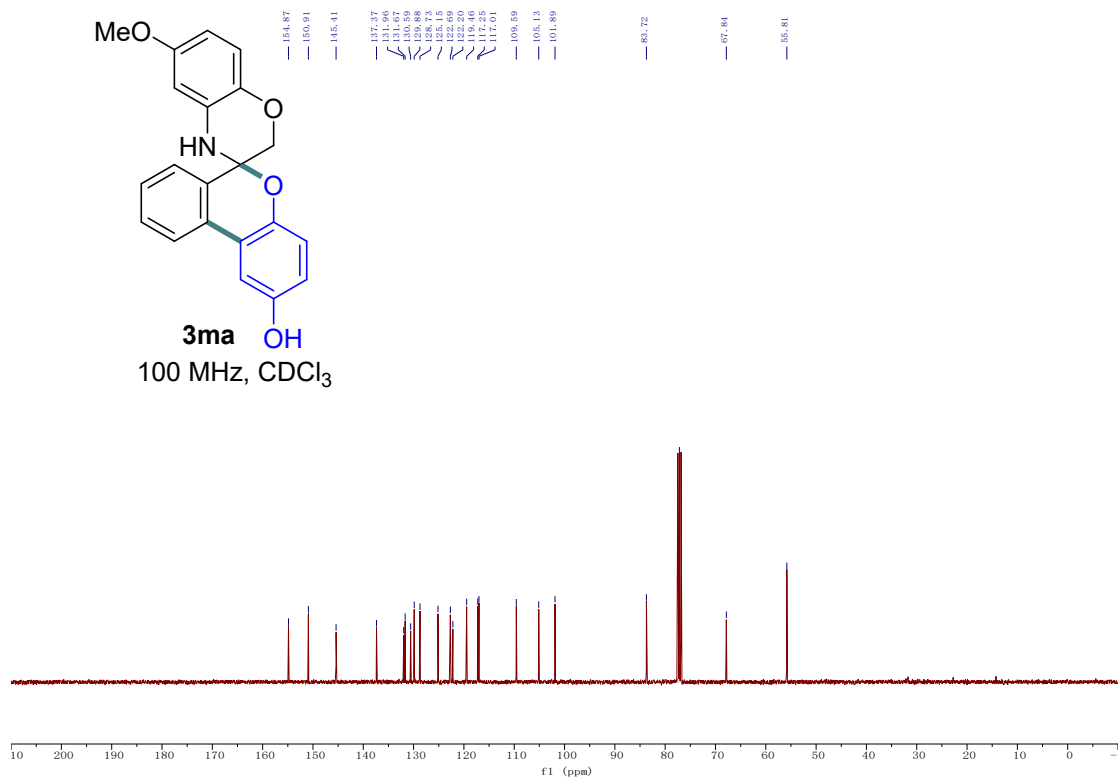

# <sup>1</sup>H and <sup>13</sup>C NMR Spectra of 3na

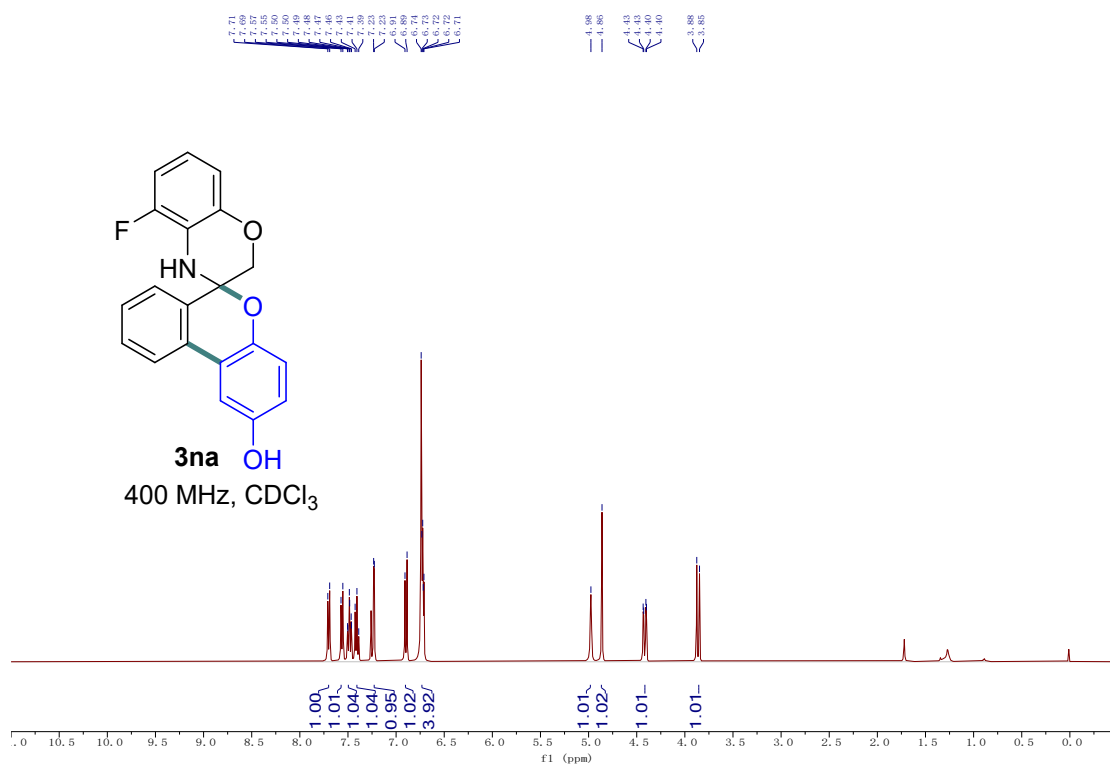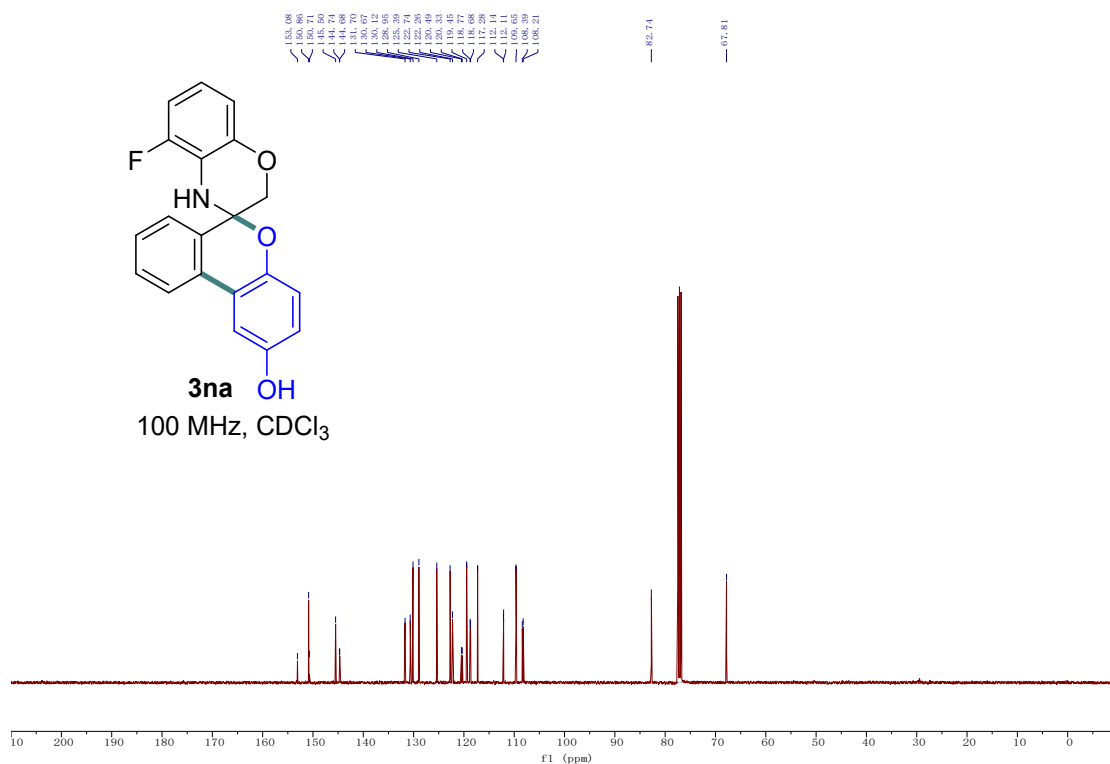

# <sup>1</sup>H and <sup>13</sup>C NMR Spectra of 3oa

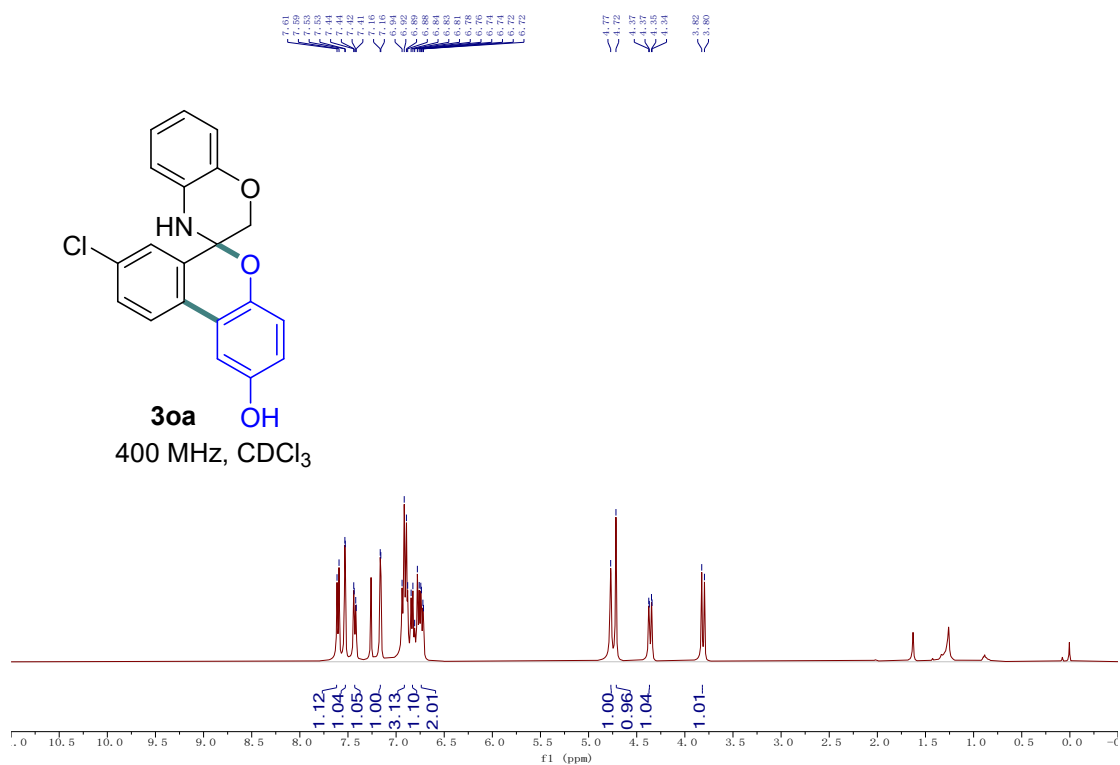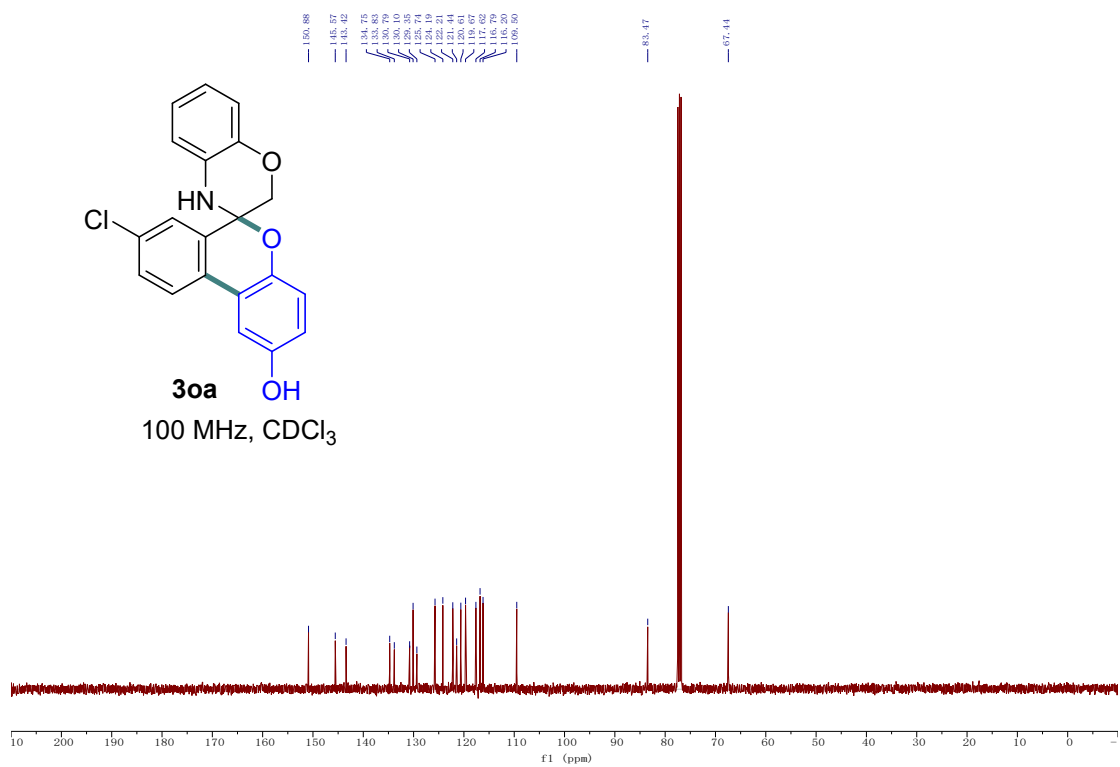











# <sup>1</sup>H and <sup>13</sup>C NMR Spectra of 3ta

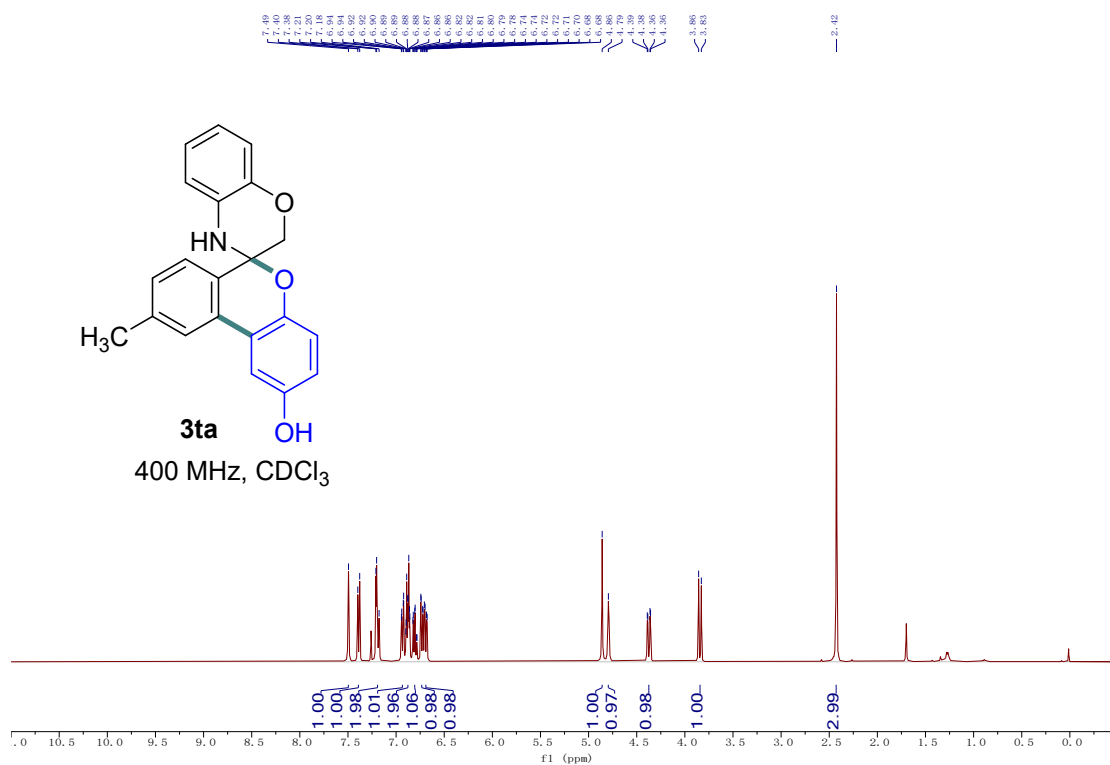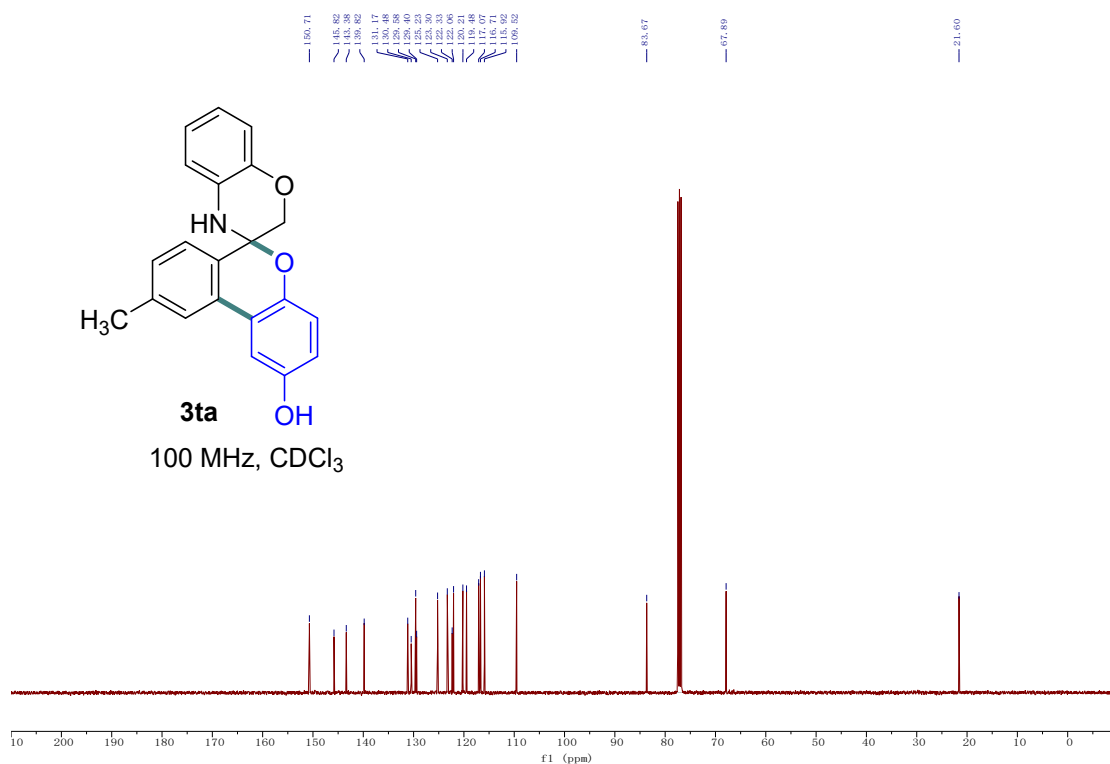

# <sup>1</sup>H and <sup>13</sup>C NMR Spectra of 3ua

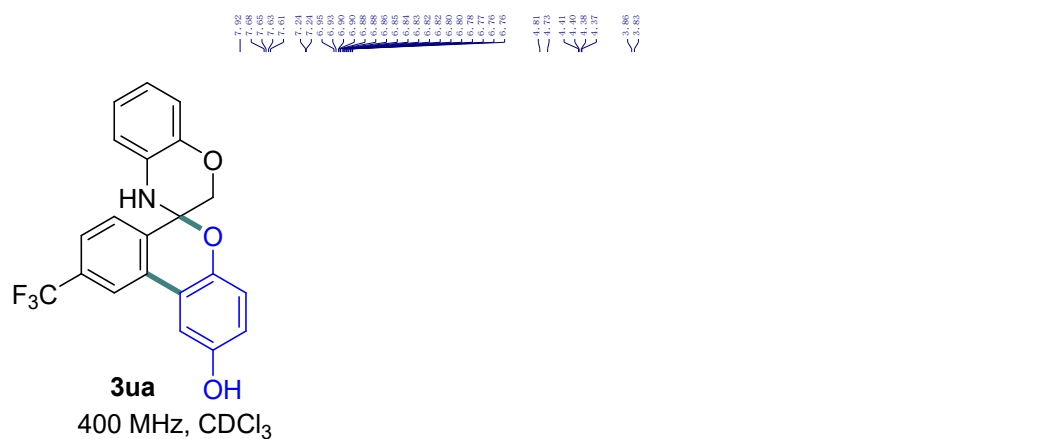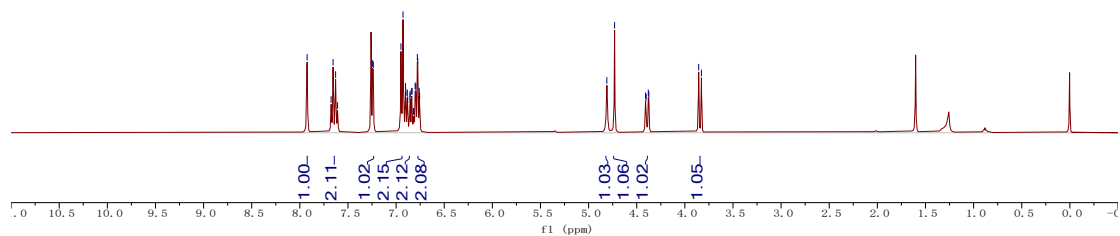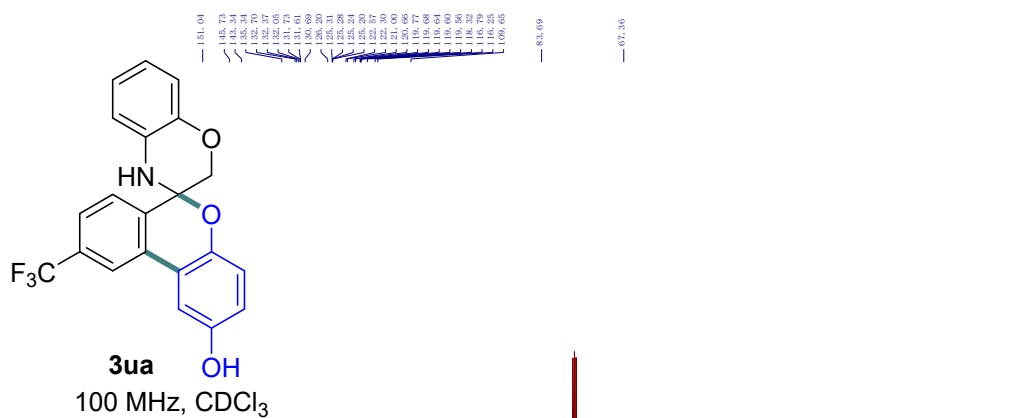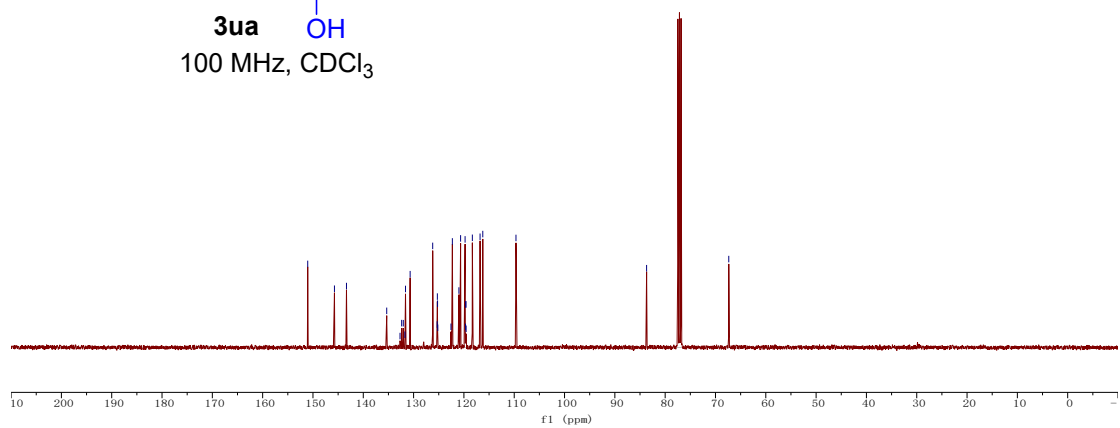

# <sup>1</sup>H and <sup>13</sup>C NMR Spectra of 3va

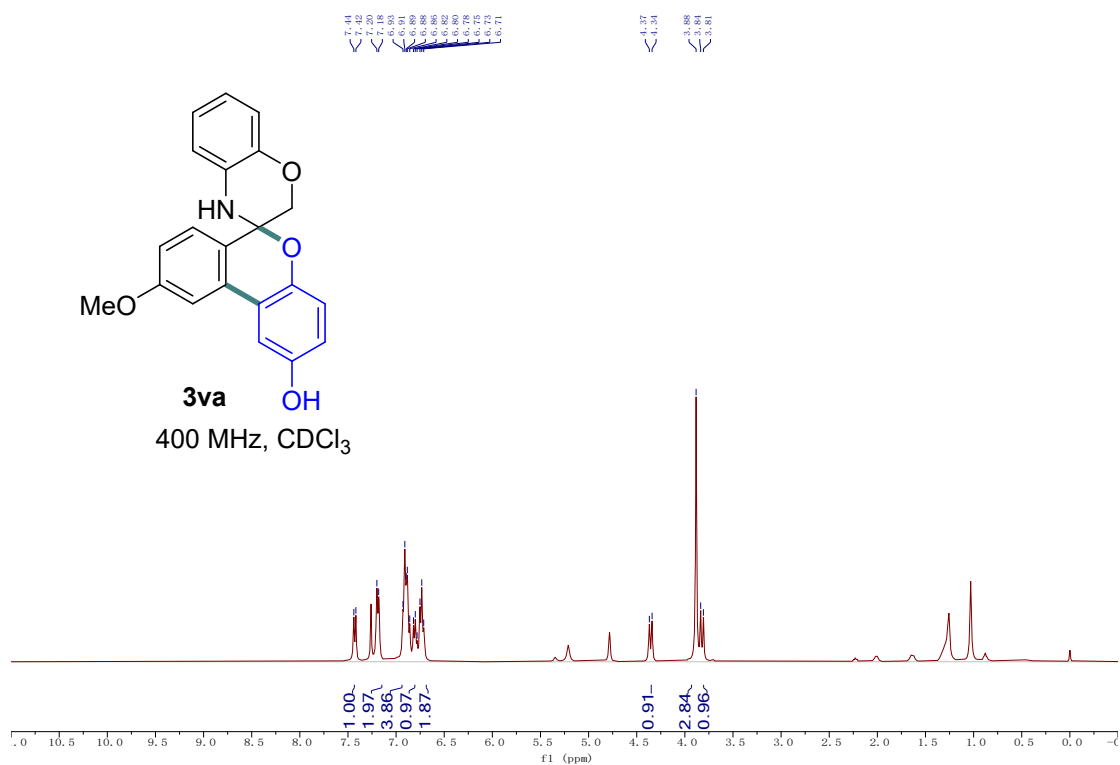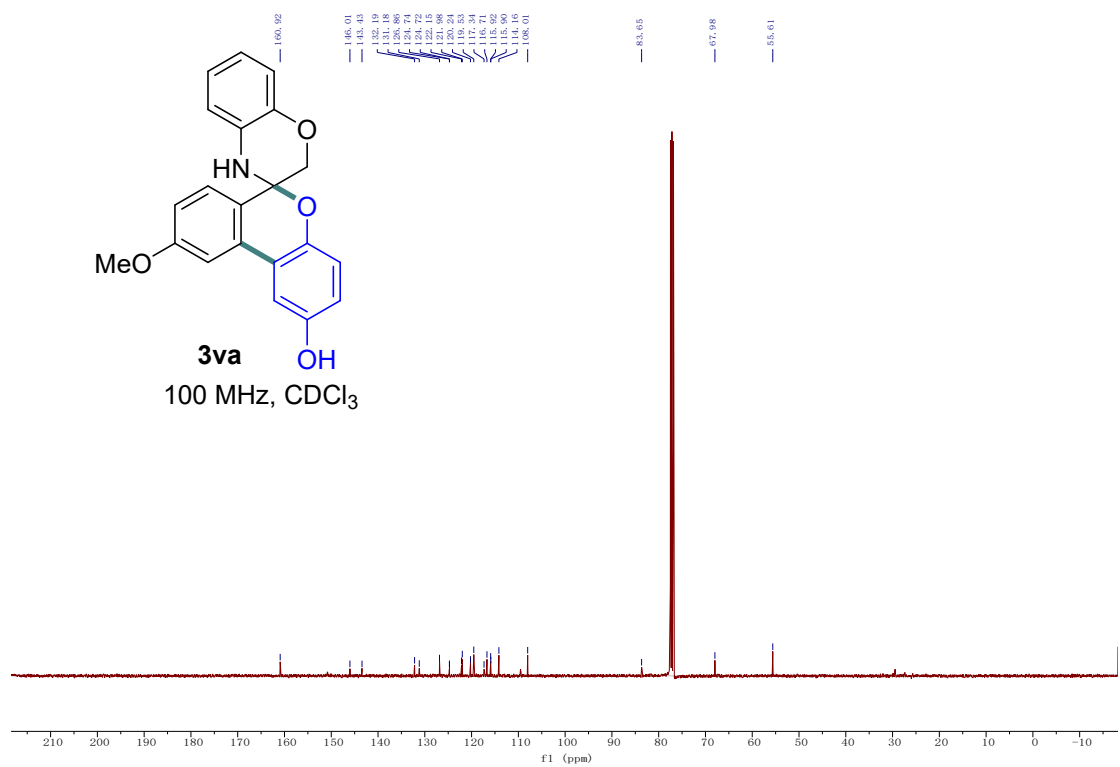

# <sup>1</sup>H and <sup>13</sup>C NMR Spectra of 3wa and 3w'a'

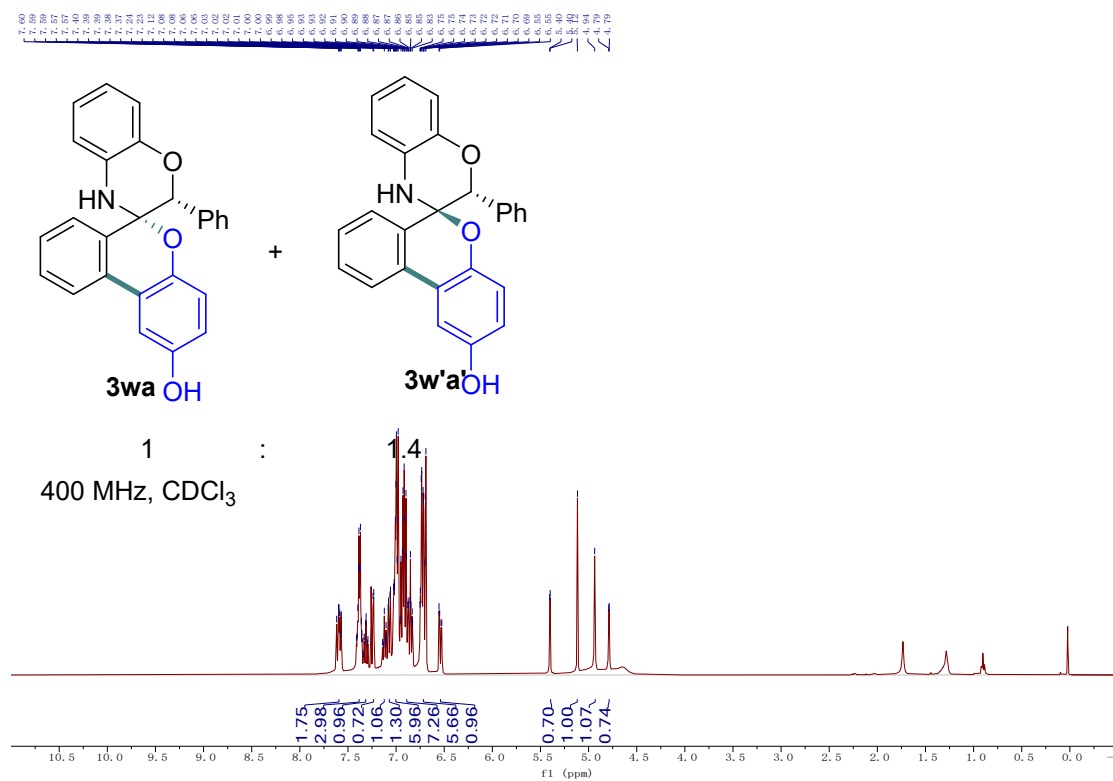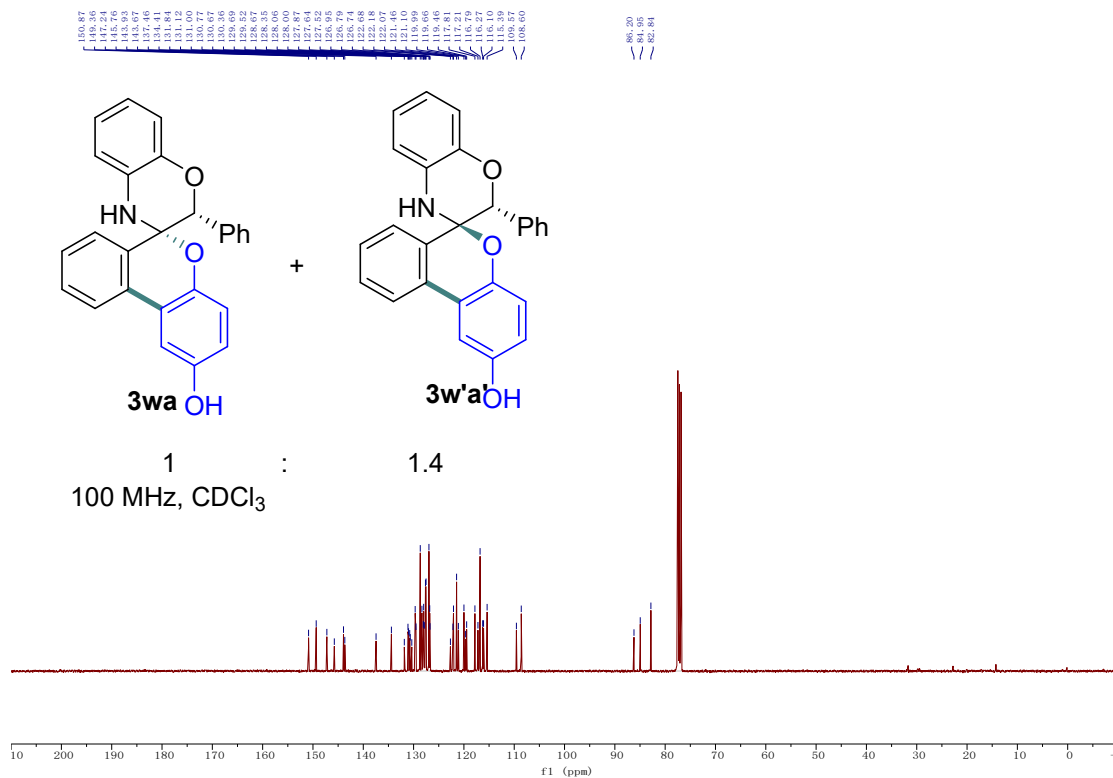





# <sup>1</sup>H and <sup>13</sup>C NMR Spectra of 3ab'

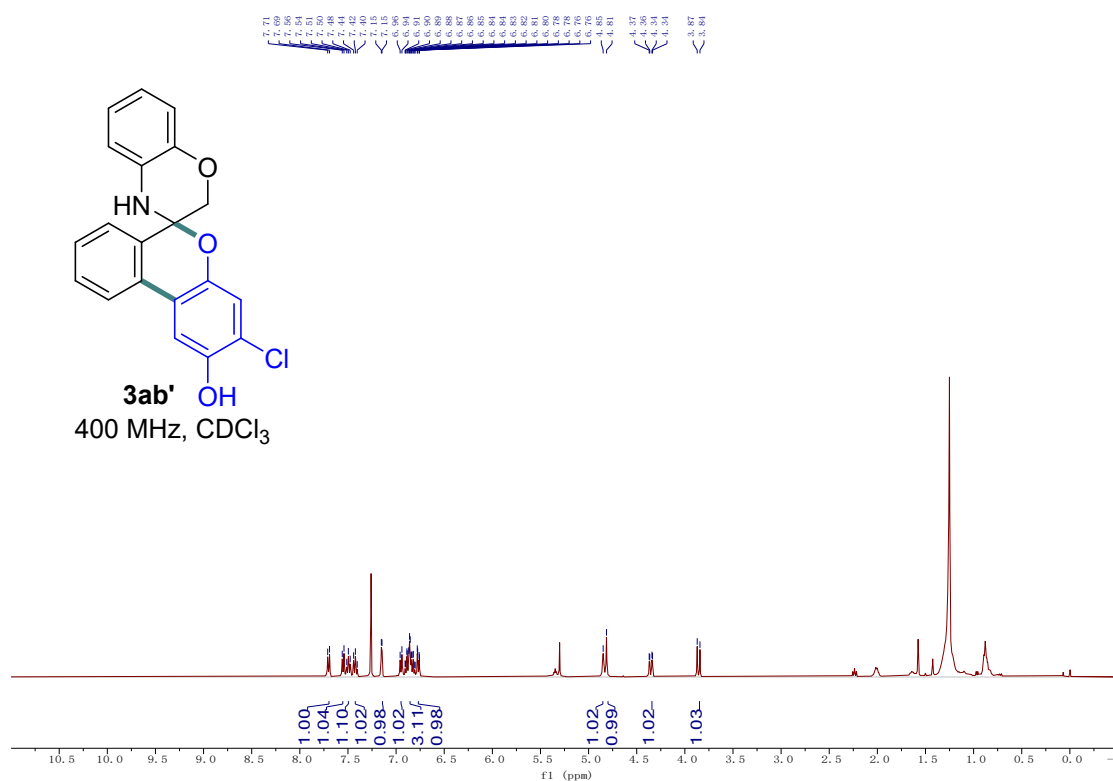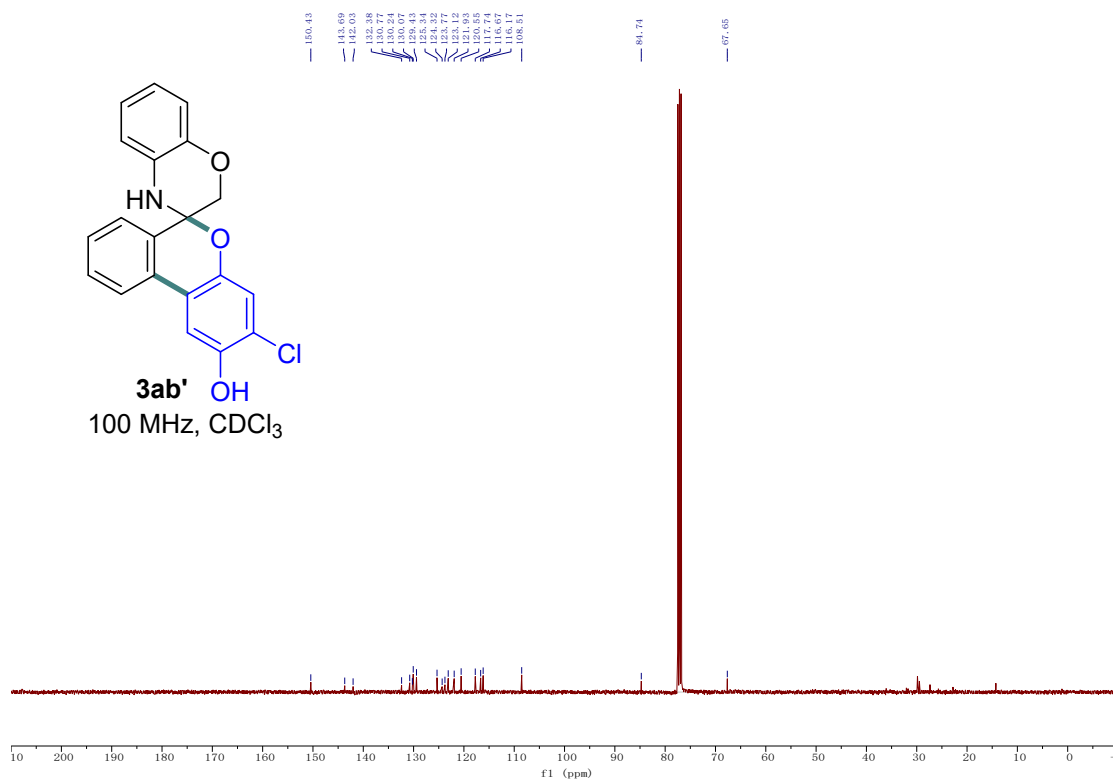

# <sup>1</sup>H and <sup>13</sup>C NMR Spectra of 3ac

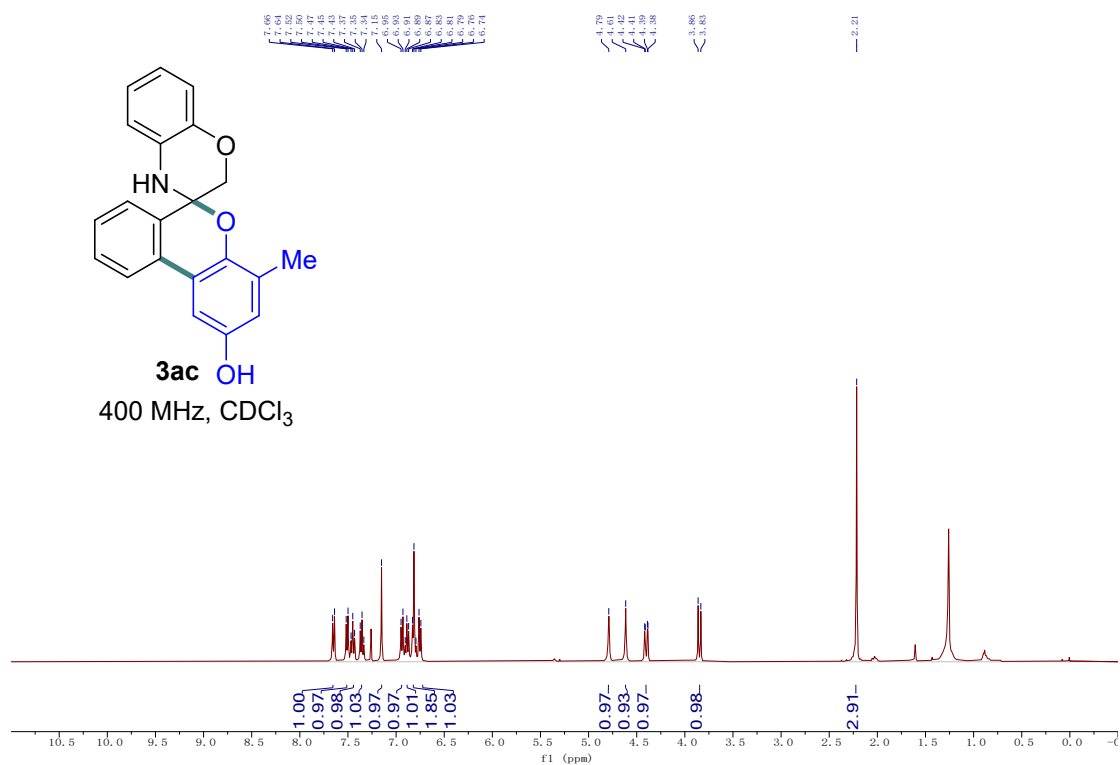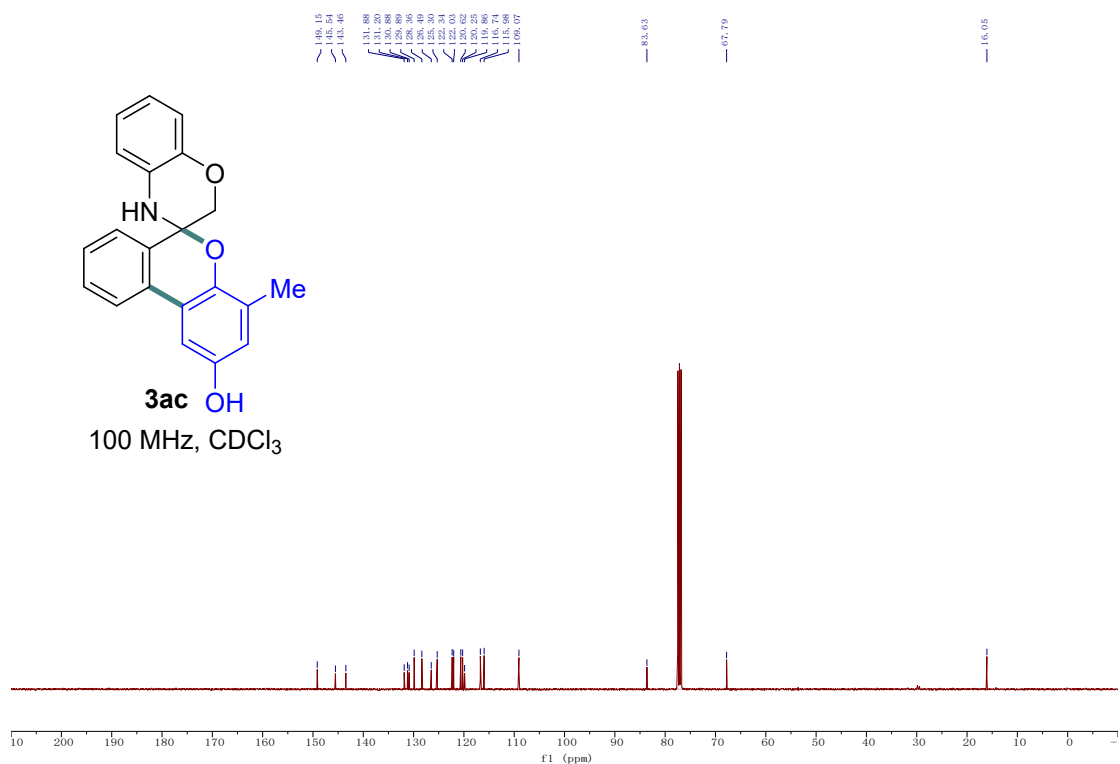

# <sup>1</sup>H and <sup>13</sup>C NMR Spectra of 3ac'

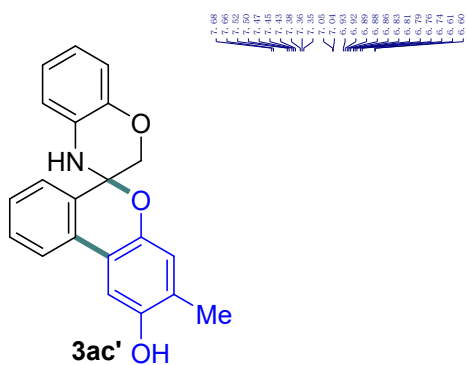

400 MHz, CDCl<sub>3</sub>

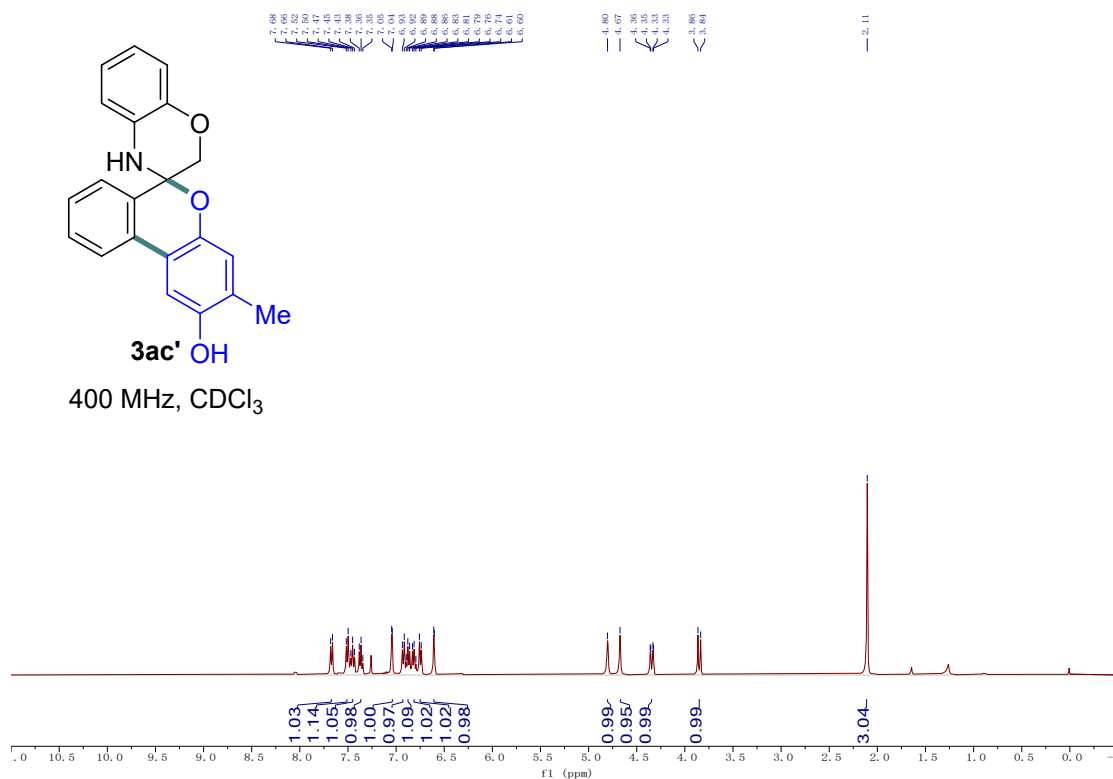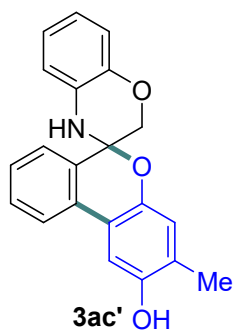

100 MHz, CDCl<sub>3</sub>

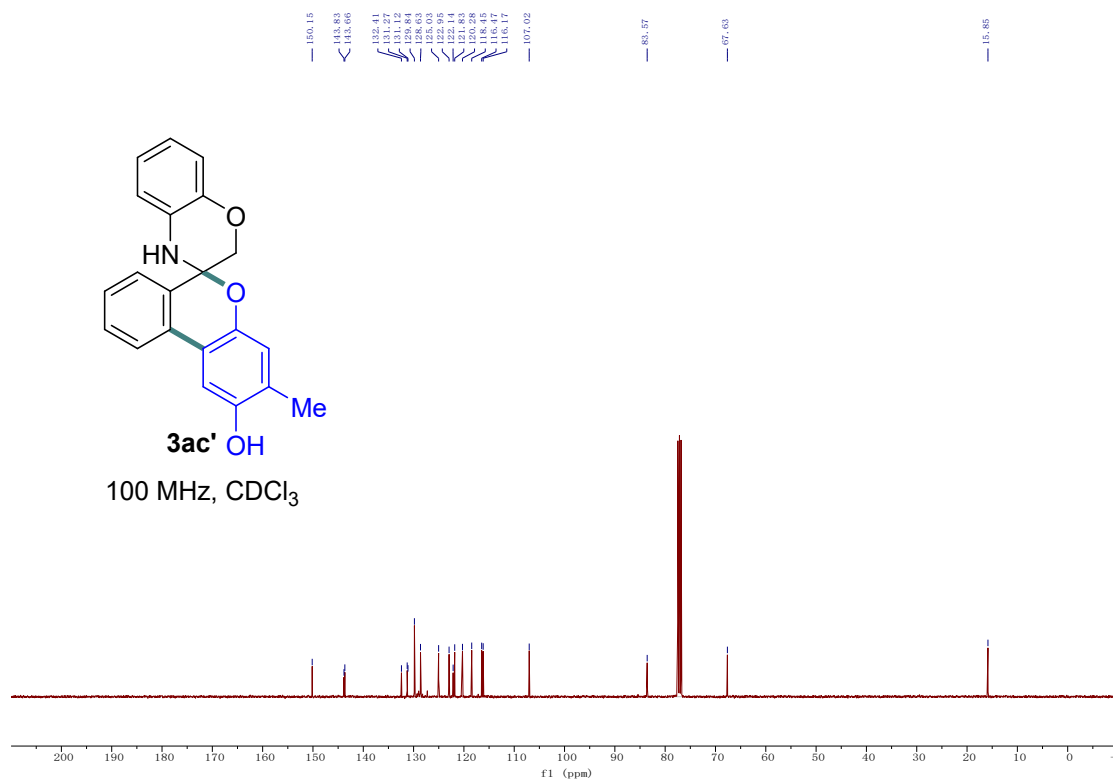

# <sup>1</sup>H and <sup>13</sup>C NMR Spectra of 3ad

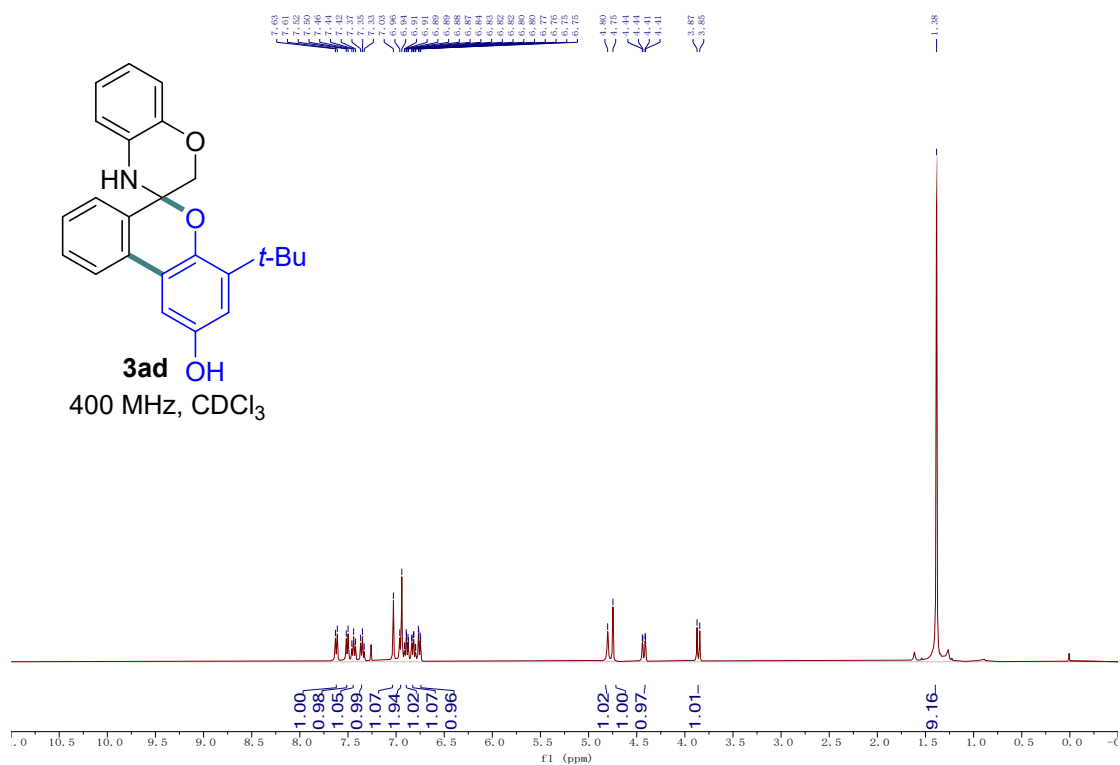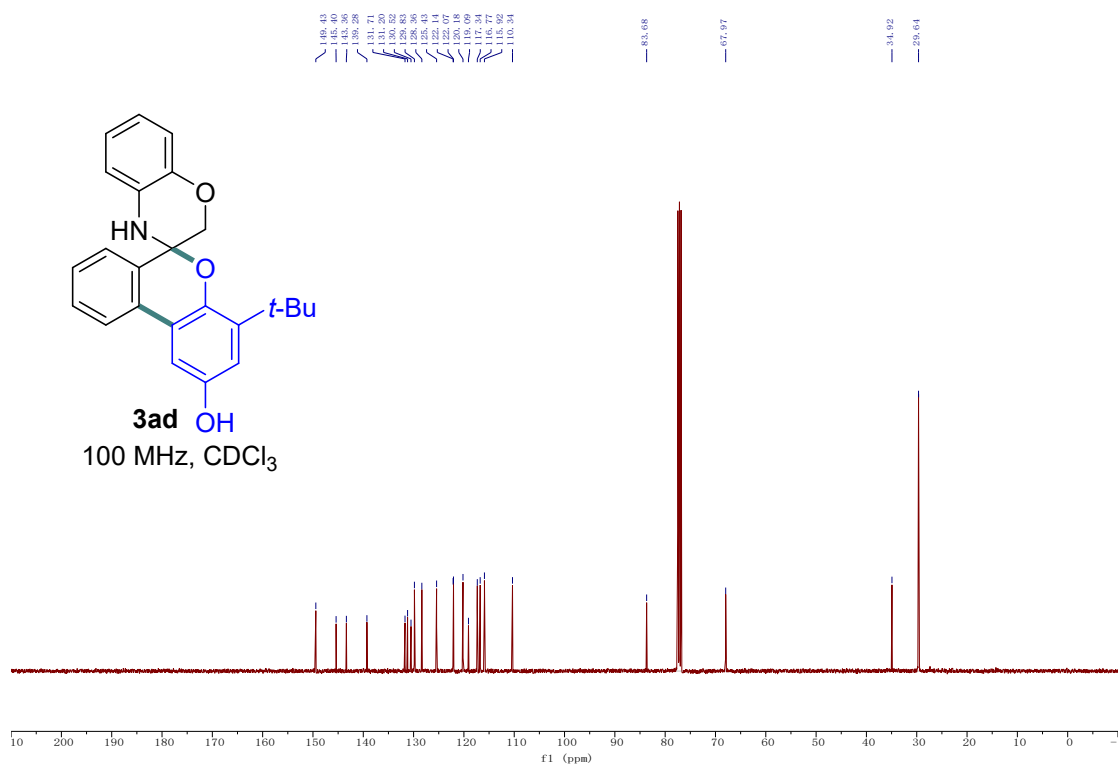

# <sup>1</sup>H and <sup>13</sup>C NMR Spectra of 3ad'

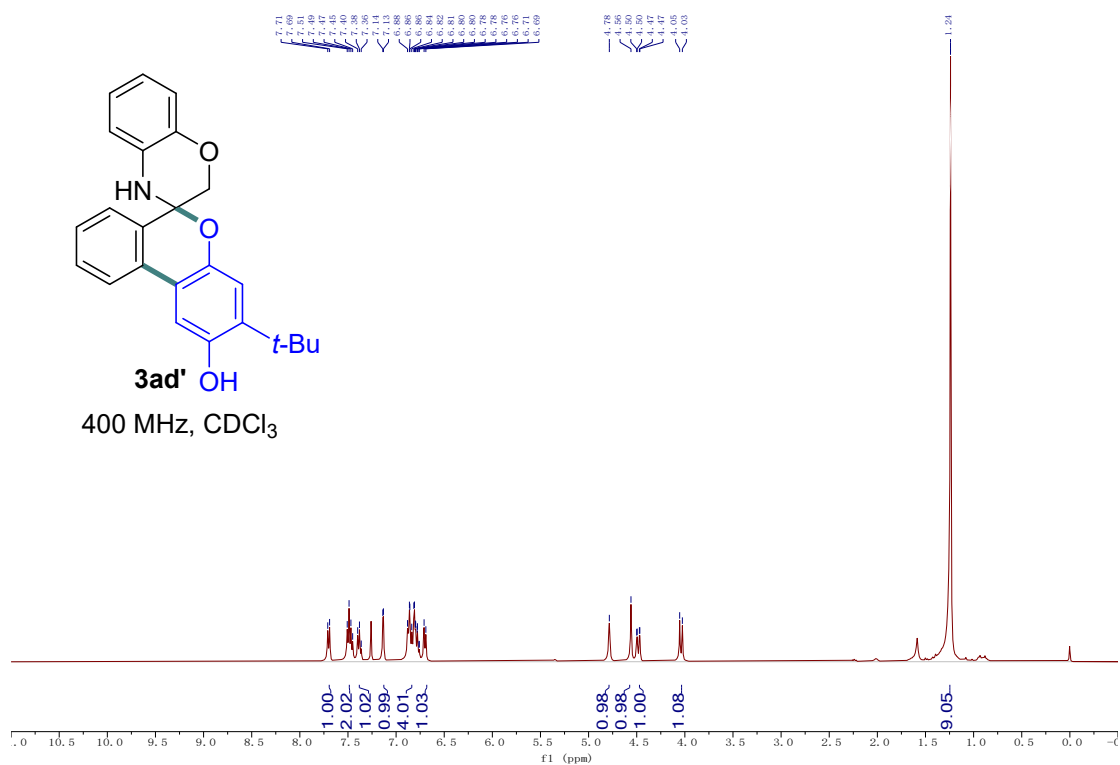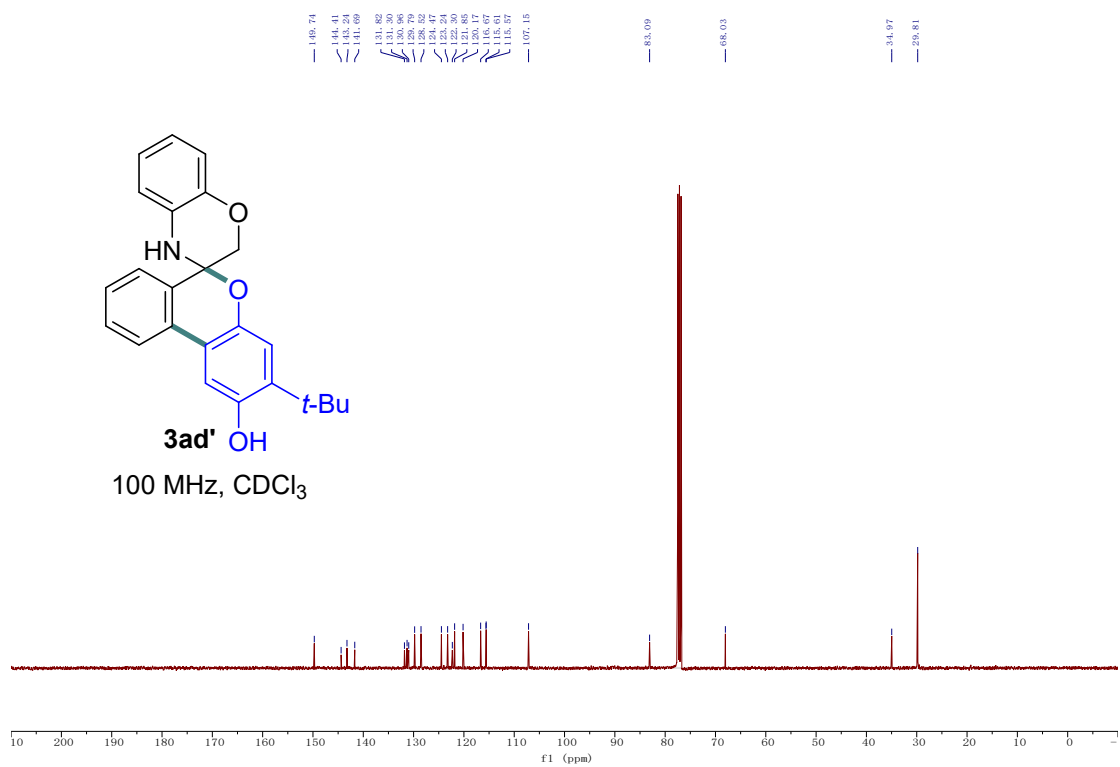

# <sup>1</sup>H and <sup>13</sup>C NMR Spectra of 3ae

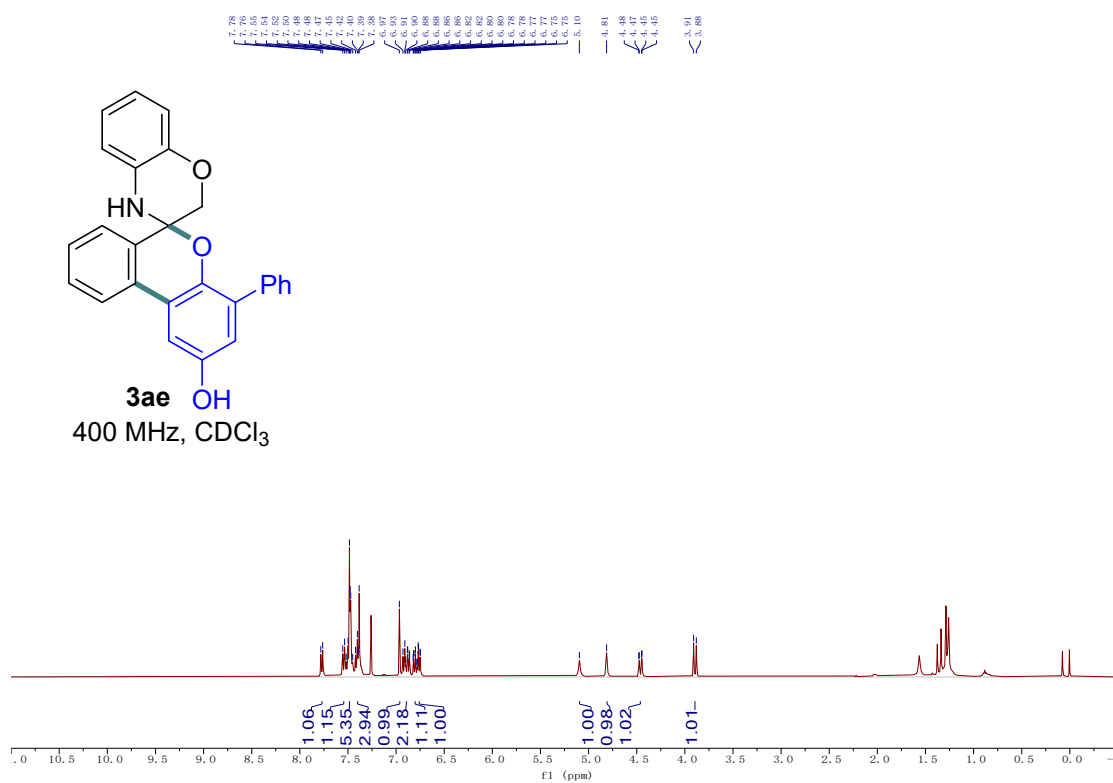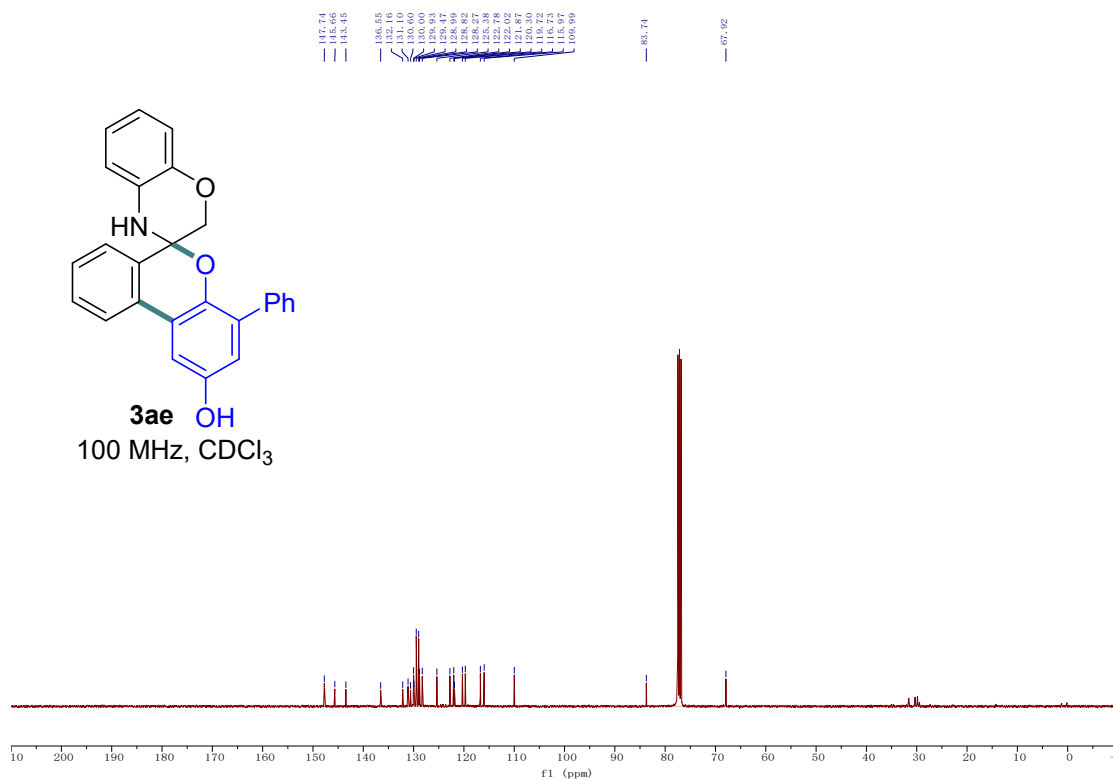

# <sup>1</sup>H and <sup>13</sup>C NMR Spectra of 3ae'

7.70  
7.69  
7.68  
7.67  
7.66  
7.65  
7.64  
7.63  
7.62  
7.61  
7.60  
7.59  
7.58  
7.57  
7.56  
7.55  
7.54  
7.53  
7.52  
7.51  
7.50  
7.49  
7.48  
7.47  
7.46  
7.45  
7.44  
7.43  
7.42  
7.41  
7.40  
7.39  
7.38  
7.37  
7.36  
7.35  
7.34  
7.33  
7.32  
7.31  
7.30  
7.29  
7.28  
7.27  
7.26  
7.25  
7.24  
7.23  
7.22  
7.21  
7.20  
7.19  
7.18  
7.17  
7.16  
7.15  
7.14  
7.13  
7.12  
7.11  
7.10  
7.09  
7.08  
7.07  
7.06  
7.05  
7.04  
7.03  
7.02  
7.01  
7.00  
6.99  
6.98  
6.97  
6.96  
6.95  
6.94  
6.93  
6.92  
6.91  
6.90  
6.89  
6.88  
6.87  
6.86  
6.85  
6.84  
6.83  
6.82  
6.81  
6.80  
6.79  
6.78  
6.77  
6.76  
6.75  
6.74  
6.73  
6.72  
6.71  
6.70  
6.69  
6.68  
6.67  
6.66  
6.65  
6.64  
6.63  
6.62  
6.61  
6.60  
6.59  
6.58  
6.57  
6.56  
6.55  
6.54  
6.53  
6.52  
6.51  
6.50  
6.49  
6.48  
6.47  
6.46  
6.45  
6.44  
6.43  
6.42  
6.41  
6.40  
6.39  
6.38  
6.37  
6.36  
6.35  
6.34  
6.33  
6.32  
6.31  
6.30  
6.29  
6.28  
6.27  
6.26  
6.25  
6.24  
6.23  
6.22  
6.21  
6.20  
6.19  
6.18  
6.17  
6.16  
6.15  
6.14  
6.13  
6.12  
6.11  
6.10  
6.09  
6.08  
6.07  
6.06  
6.05  
6.04  
6.03  
6.02  
6.01  
6.00  
5.99  
5.98  
5.97  
5.96  
5.95  
5.94  
5.93  
5.92  
5.91  
5.90  
5.89  
5.88  
5.87  
5.86  
5.85  
5.84  
5.83  
5.82  
5.81  
5.80  
5.79  
5.78  
5.77  
5.76  
5.75  
5.74  
5.73  
5.72  
5.71  
5.70  
5.69  
5.68  
5.67  
5.66  
5.65  
5.64  
5.63  
5.62  
5.61  
5.60  
5.59  
5.58  
5.57  
5.56  
5.55  
5.54  
5.53  
5.52  
5.51  
5.50  
5.49  
5.48  
5.47  
5.46  
5.45  
5.44  
5.43  
5.42  
5.41  
5.40  
5.39  
5.38  
5.37  
5.36  
5.35  
5.34  
5.33  
5.32  
5.31  
5.30  
5.29  
5.28  
5.27  
5.26  
5.25  
5.24  
5.23  
5.22  
5.21  
5.20  
5.19  
5.18  
5.17  
5.16  
5.15  
5.14  
5.13  
5.12  
5.11  
5.10  
5.09  
5.08  
5.07  
5.06  
5.05  
5.04  
5.03  
5.02  
5.01  
5.00  
4.99  
4.98  
4.97  
4.96  
4.95  
4.94  
4.93  
4.92  
4.91  
4.90  
4.89  
4.88  
4.87  
4.86  
4.85  
4.84  
4.83  
4.82  
4.81  
4.80  
4.79  
4.78  
4.77  
4.76  
4.75  
4.74  
4.73  
4.72  
4.71  
4.70  
4.69  
4.68  
4.67  
4.66  
4.65  
4.64  
4.63  
4.62  
4.61  
4.60  
4.59  
4.58  
4.57  
4.56  
4.55  
4.54  
4.53  
4.52  
4.51  
4.50  
4.49  
4.48  
4.47  
4.46  
4.45  
4.44  
4.43  
4.42  
4.41  
4.40  
4.39  
4.38  
4.37  
4.36  
4.35  
4.34  
4.33  
4.32  
4.31  
4.30  
4.29  
4.28  
4.27  
4.26  
4.25  
4.24  
4.23  
4.22  
4.21  
4.20  
4.19  
4.18  
4.17  
4.16  
4.15  
4.14  
4.13  
4.12  
4.11  
4.10  
4.09  
4.08  
4.07  
4.06  
4.05  
4.04  
4.03  
4.02  
4.01  
4.00  
3.99  
3.98  
3.97  
3.96  
3.95  
3.94  
3.93  
3.92  
3.91  
3.90  
3.89  
3.88  
3.87  
3.86  
3.85  
3.84  
3.83  
3.82  
3.81  
3.80  
3.79  
3.78  
3.77  
3.76  
3.75  
3.74  
3.73  
3.72  
3.71  
3.70  
3.69  
3.68  
3.67  
3.66  
3.65  
3.64  
3.63  
3.62  
3.61  
3.60  
3.59  
3.58  
3.57  
3.56  
3.55  
3.54  
3.53  
3.52  
3.51  
3.50  
3.49  
3.48  
3.47  
3.46  
3.45  
3.44  
3.43  
3.42  
3.41  
3.40  
3.39  
3.38  
3.37  
3.36  
3.35  
3.34  
3.33  
3.32  
3.31  
3.30  
3.29  
3.28  
3.27  
3.26  
3.25  
3.24  
3.23  
3.22  
3.21  
3.20  
3.19  
3.18  
3.17  
3.16  
3.15  
3.14  
3.13  
3.12  
3.11  
3.10  
3.09  
3.08  
3.07  
3.06  
3.05  
3.04  
3.03  
3.02  
3.01  
3.00  
2.99  
2.98  
2.97  
2.96  
2.95  
2.94  
2.93  
2.92  
2.91  
2.90  
2.89  
2.88  
2.87  
2.86  
2.85  
2.84  
2.83  
2.82  
2.81  
2.80  
2.79  
2.78  
2.77  
2.76  
2.75  
2.74  
2.73  
2.72  
2.71  
2.70  
2.69  
2.68  
2.67  
2.66  
2.65  
2.64  
2.63  
2.62  
2.61  
2.60  
2.59  
2.58  
2.57  
2.56  
2.55  
2.54  
2.53  
2.52  
2.51  
2.50  
2.49  
2.48  
2.47  
2.46  
2.45  
2.44  
2.43  
2.42  
2.41  
2.40  
2.39  
2.38  
2.37  
2.36  
2.35  
2.34  
2.33  
2.32  
2.31  
2.30  
2.29  
2.28  
2.27  
2.26  
2.25  
2.24  
2.23  
2.22  
2.21  
2.20  
2.19  
2.18  
2.17  
2.16  
2.15  
2.14  
2.13  
2.12  
2.11  
2.10  
2.09  
2.08  
2.07  
2.06  
2.05  
2.04  
2.03  
2.02  
2.01  
2.00  
1.99  
1.98  
1.97  
1.96  
1.95  
1.94  
1.93  
1.92  
1.91  
1.90  
1.89  
1.88  
1.87  
1.86  
1.85  
1.84  
1.83  
1.82  
1.81  
1.80  
1.79  
1.78  
1.77  
1.76  
1.75  
1.74  
1.73  
1.72  
1.71  
1.70  
1.69  
1.68  
1.67  
1.66  
1.65  
1.64  
1.63  
1.62  
1.61  
1.60  
1.59  
1.58  
1.57  
1.56  
1.55  
1.54  
1.53  
1.52  
1.51  
1.50  
1.49  
1.48  
1.47  
1.46  
1.45  
1.44  
1.43  
1.42  
1.41  
1.40  
1.39  
1.38  
1.37  
1.36  
1.35  
1.34  
1.33  
1.32  
1.31  
1.30  
1.29  
1.28  
1.27  
1.26  
1.25  
1.24  
1.23  
1.22  
1.21  
1.20  
1.19  
1.18  
1.17  
1.16  
1.15  
1.14  
1.13  
1.12  
1.11  
1.10  
1.09  
1.08  
1.07  
1.06  
1.05  
1.04  
1.03  
1.02  
1.01  
1.00  
0.99  
0.98  
0.97  
0.96  
0.95  
0.94  
0.93  
0.92  
0.91  
0.90  
0.89  
0.88  
0.87  
0.86  
0.85  
0.84  
0.83  
0.82  
0.81  
0.80  
0.79  
0.78  
0.77  
0.76  
0.75  
0.74  
0.73  
0.72  
0.71  
0.70  
0.69  
0.68  
0.67  
0.66  
0.65  
0.64  
0.63  
0.62  
0.61  
0.60  
0.59  
0.58  
0.57  
0.56  
0.55  
0.54  
0.53  
0.52  
0.51  
0.50  
0.49  
0.48  
0.47  
0.46  
0.45  
0.44  
0.43  
0.42  
0.41  
0.40  
0.39  
0.38  
0.37  
0.36  
0.35  
0.34  
0.33  
0.32  
0.31  
0.30  
0.29  
0.28  
0.27  
0.26  
0.25  
0.24  
0.23  
0.22  
0.21  
0.20  
0.19  
0.18  
0.17  
0.16  
0.15  
0.14  
0.13  
0.12  
0.11  
0.10  
0.09  
0.08  
0.07  
0.06  
0.05  
0.04  
0.03  
0.02  
0.01  
0.00  
-0.01  
-0.02  
-0.03  
-0.04  
-0.05  
-0.06  
-0.07  
-0.08  
-0.09  
-0.10  
-0.11  
-0.12  
-0.13  
-0.14  
-0.15  
-0.16  
-0.17  
-0.18  
-0.19  
-0.20  
-0.21  
-0.22  
-0.23  
-0.24  
-0.25  
-0.26  
-0.27  
-0.28  
-0.29  
-0.30  
-0.31  
-0.32  
-0.33  
-0.34  
-0.35  
-0.36  
-0.37  
-0.38  
-0.39  
-0.40  
-0.41  
-0.42  
-0.43  
-0.44  
-0.45  
-0.46  
-0.47  
-0.48  
-0.49  
-0.50  
-0.51  
-0.52  
-0.53  
-0.54  
-0.55  
-0.56  
-0.57  
-0.58  
-0.59  
-0.60  
-0.61  
-0.62  
-0.63  
-0.64  
-0.65  
-0.66  
-0.67  
-0.68  
-0.69  
-0.70  
-0.71  
-0.72  
-0.73  
-0.74  
-0.75  
-0.76  
-0.77  
-0.78  
-0.79  
-0.80  
-0.81  
-0.82  
-0.83  
-0.84  
-0.85  
-0.86  
-0.87  
-0.88  
-0.89  
-0.90  
-0.91  
-0.92  
-0.93  
-0.94  
-0.95  
-0.96  
-0.97  
-0.98  
-0.99  
-1.00

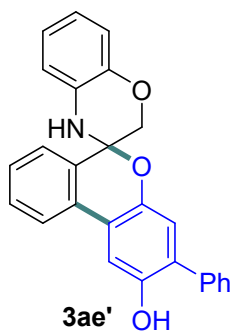

**3ae'**  
400 MHz, CDCl<sub>3</sub>

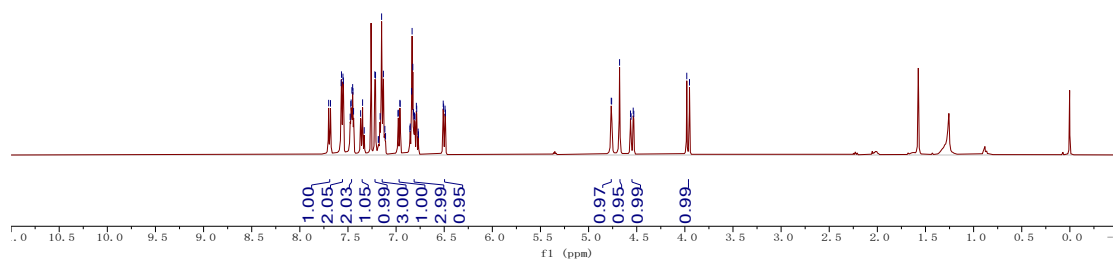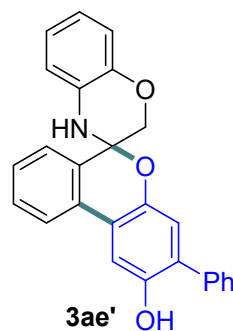

**3ae'**  
100 MHz, CDCl<sub>3</sub>

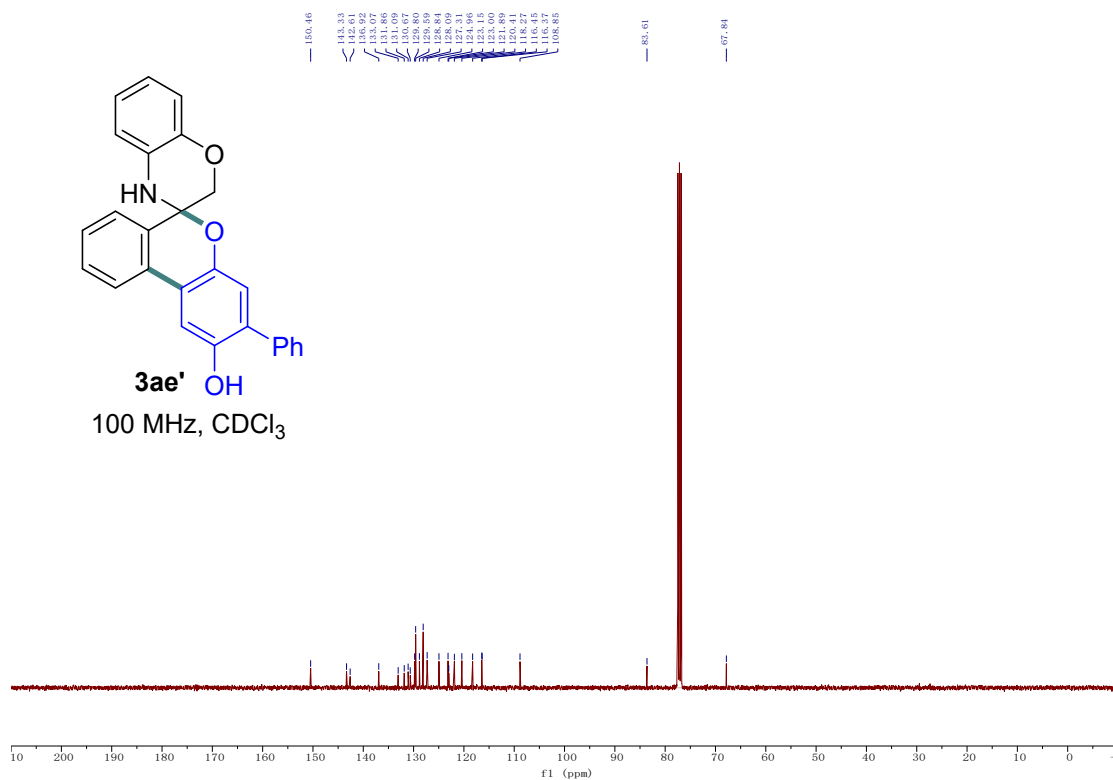

# <sup>1</sup>H and <sup>13</sup>C NMR Spectra of 3af

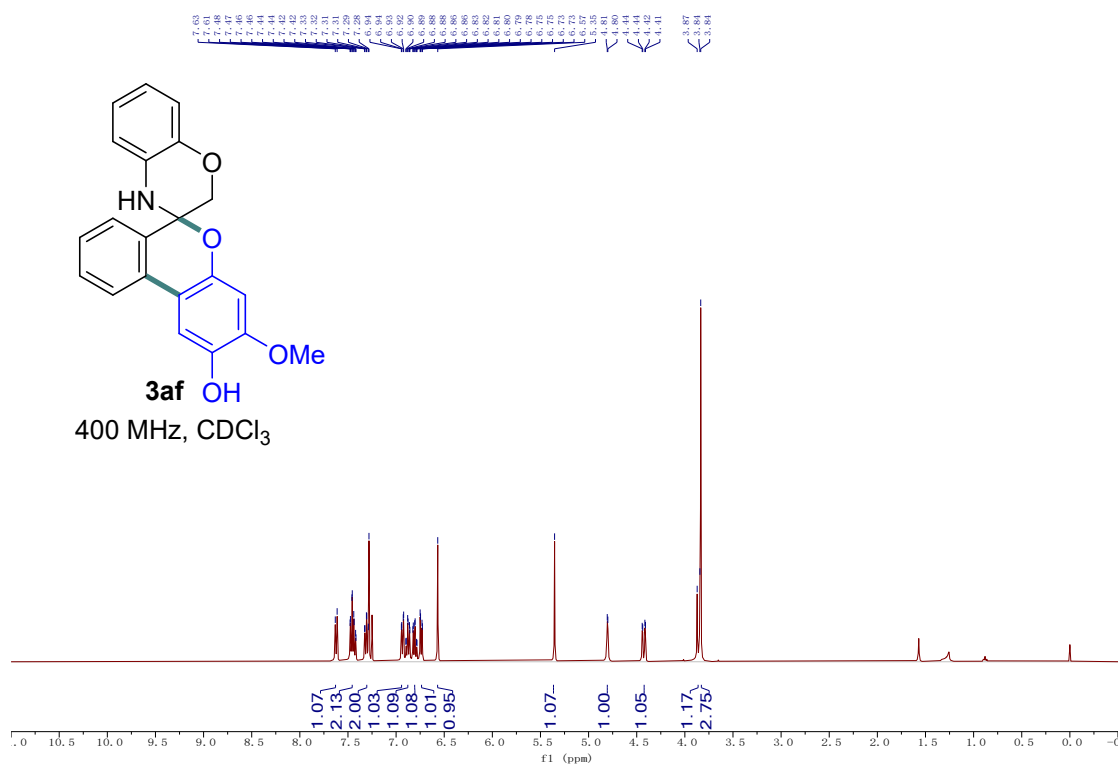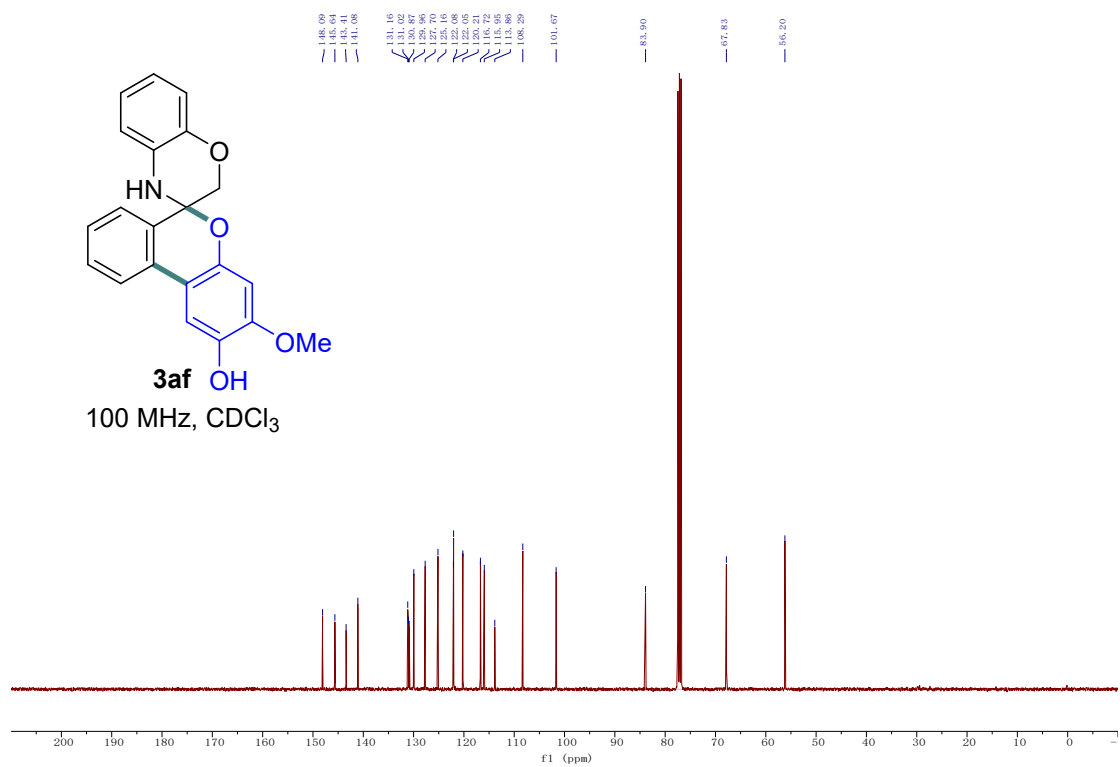



# <sup>1</sup>H and <sup>13</sup>C NMR Spectra of 3ag

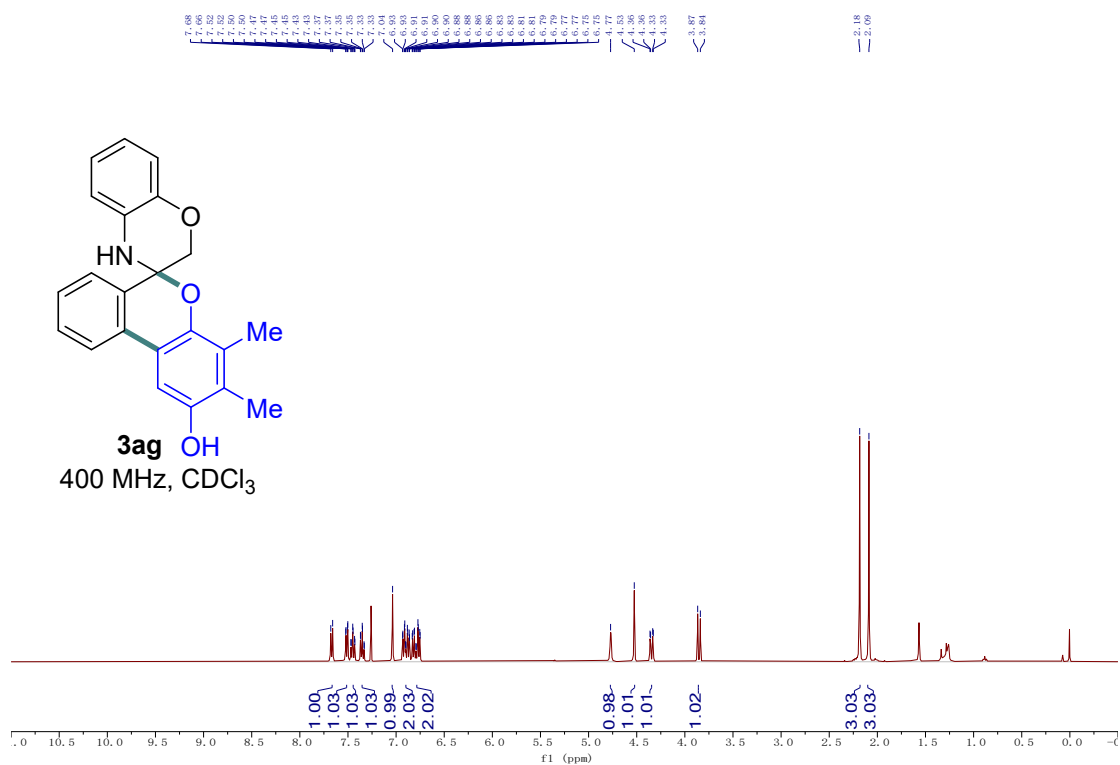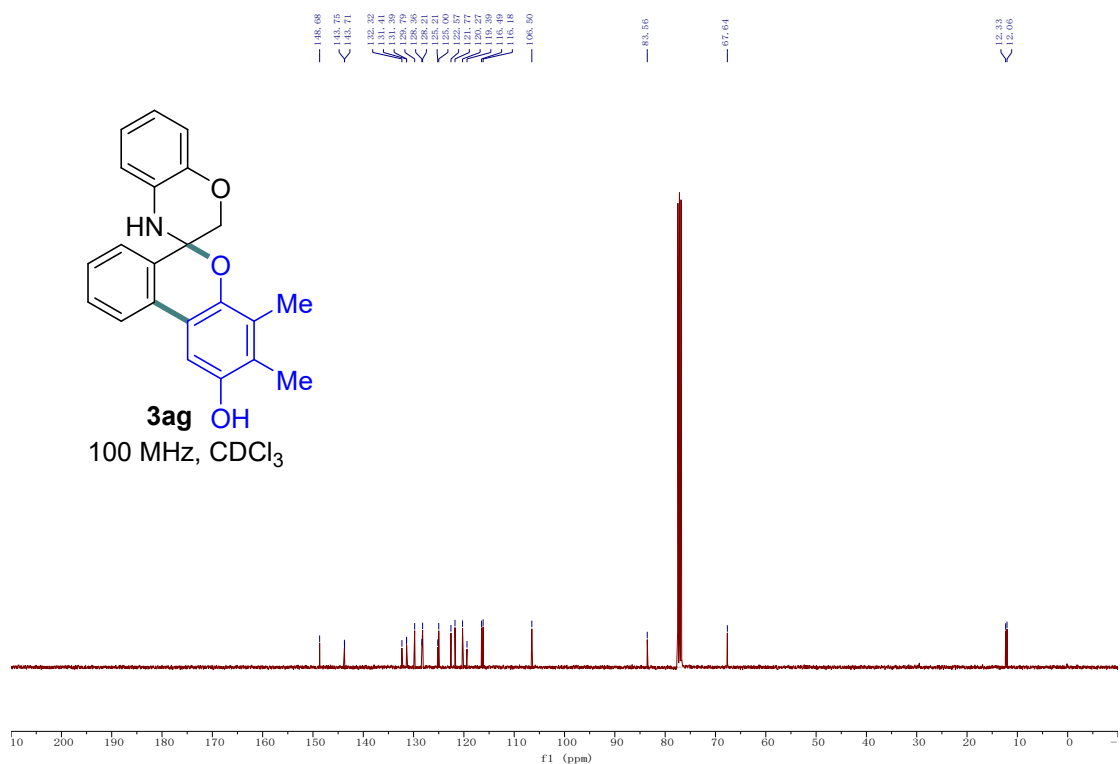

# <sup>1</sup>H and <sup>13</sup>C NMR Spectra of 3ah

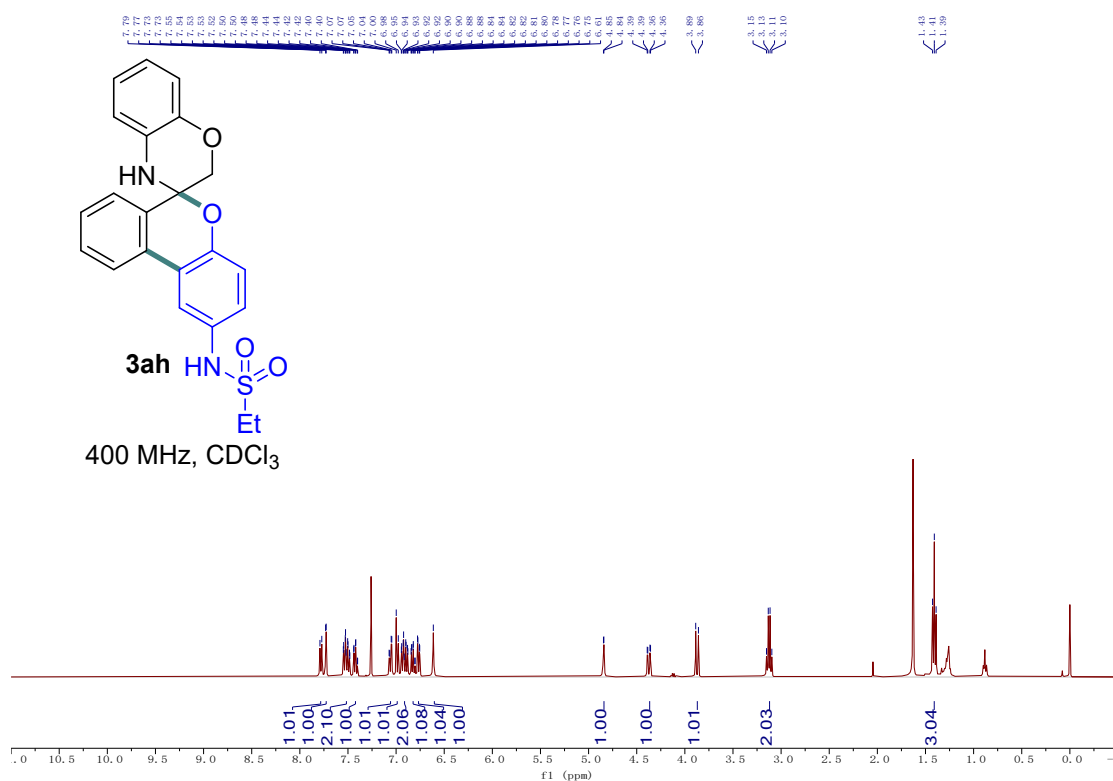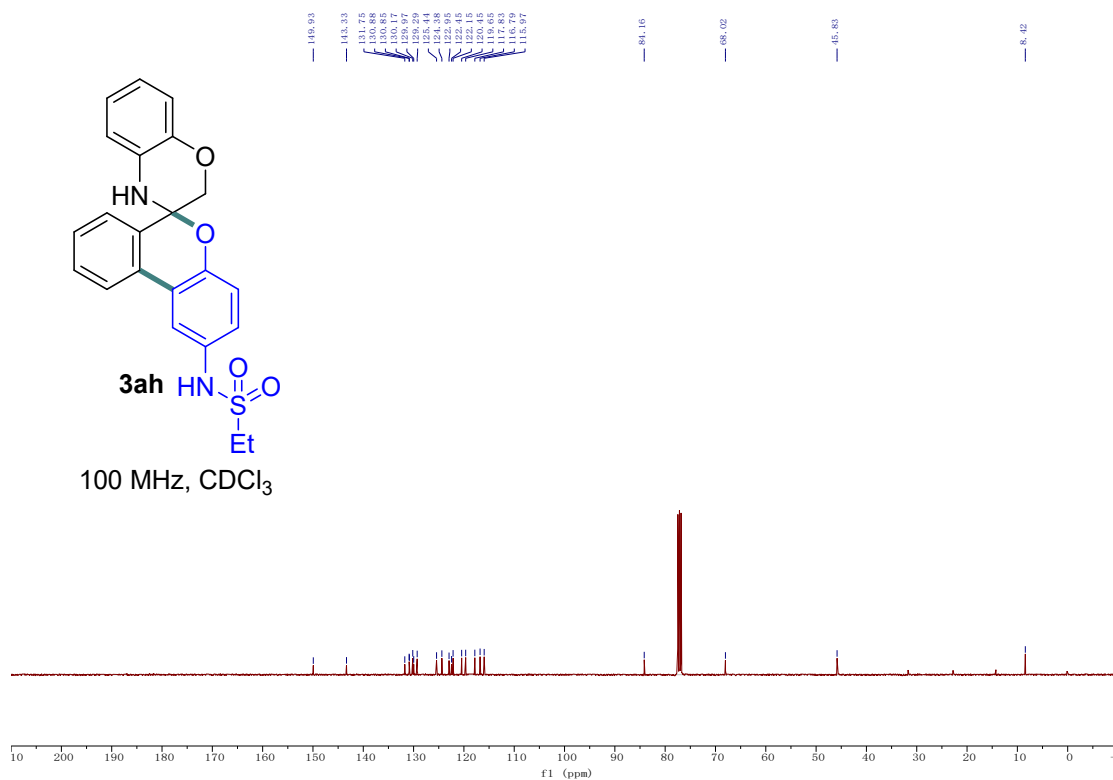





# <sup>1</sup>H and <sup>13</sup>C NMR Spectra of 3ak

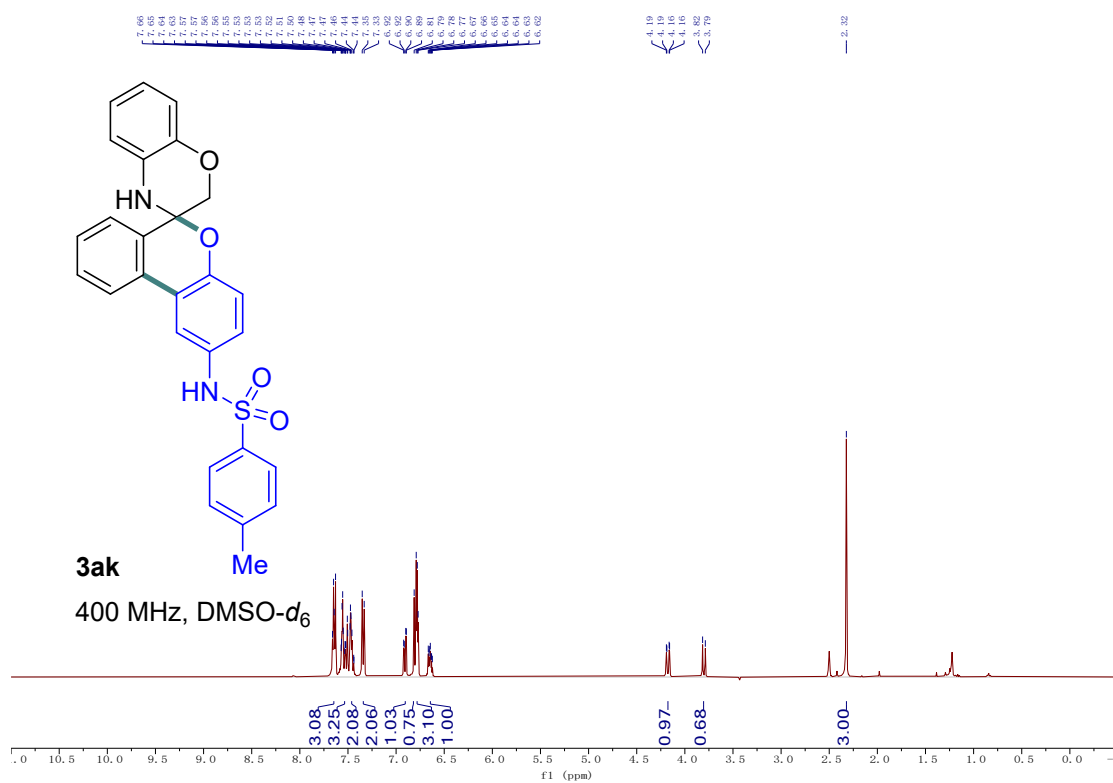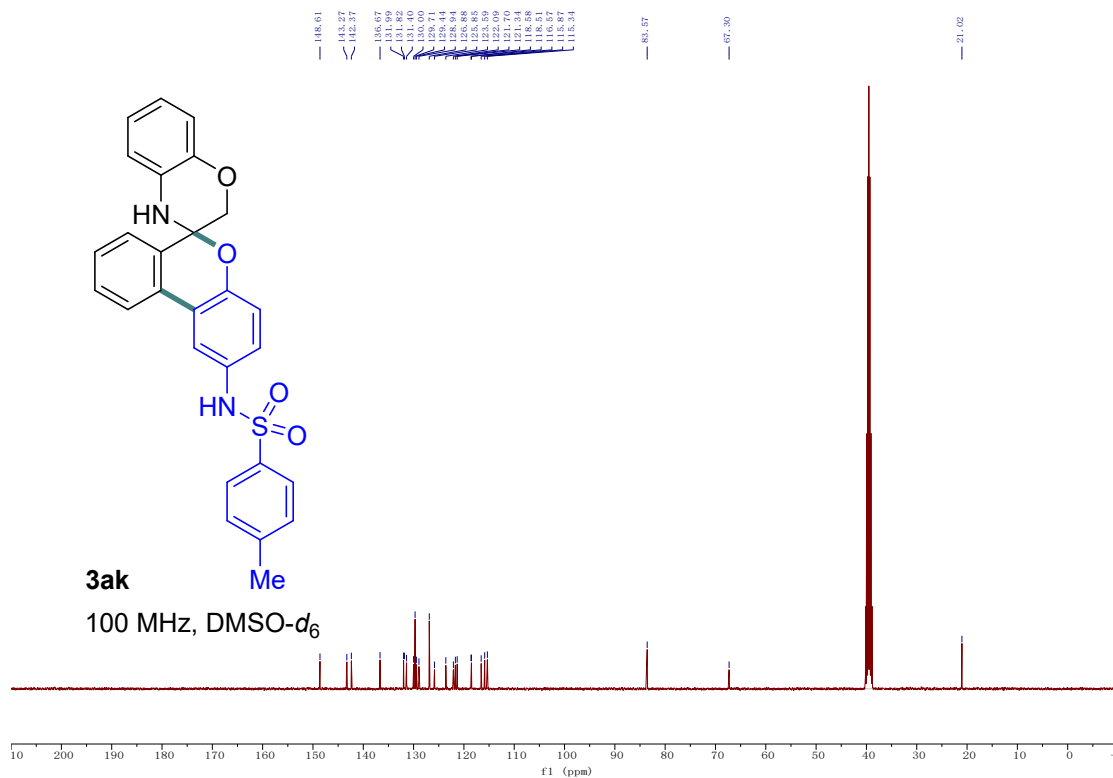

# <sup>1</sup>H and <sup>13</sup>C NMR Spectra of 3al

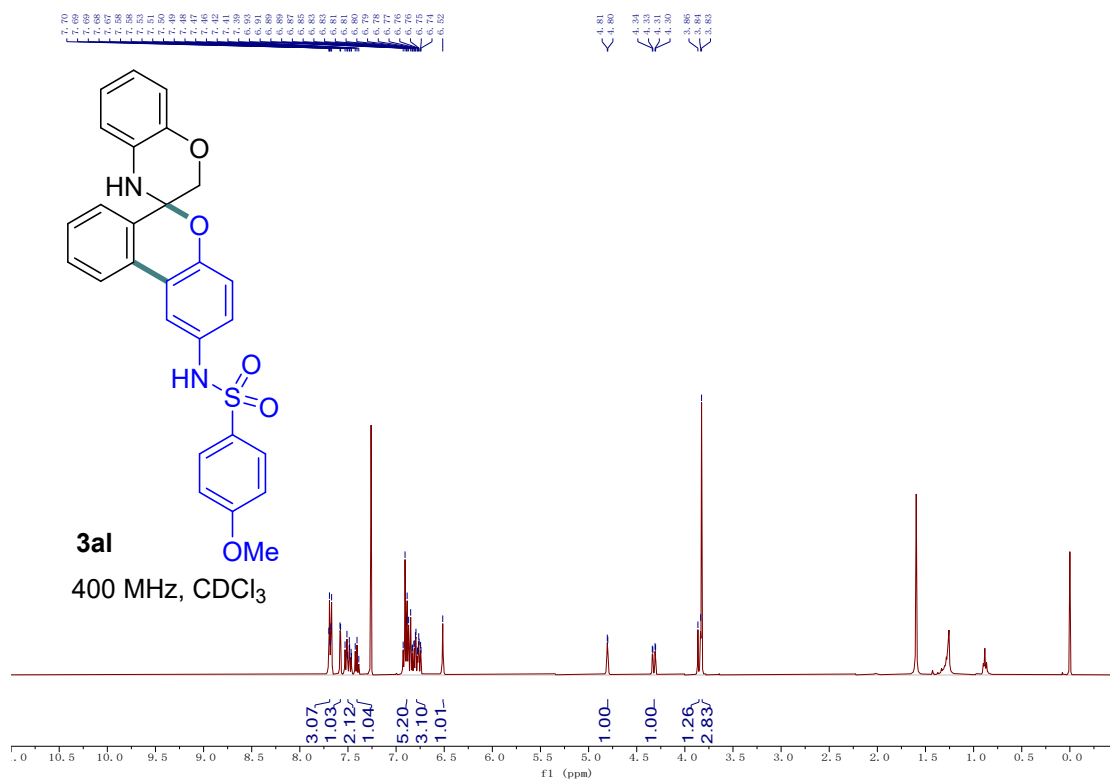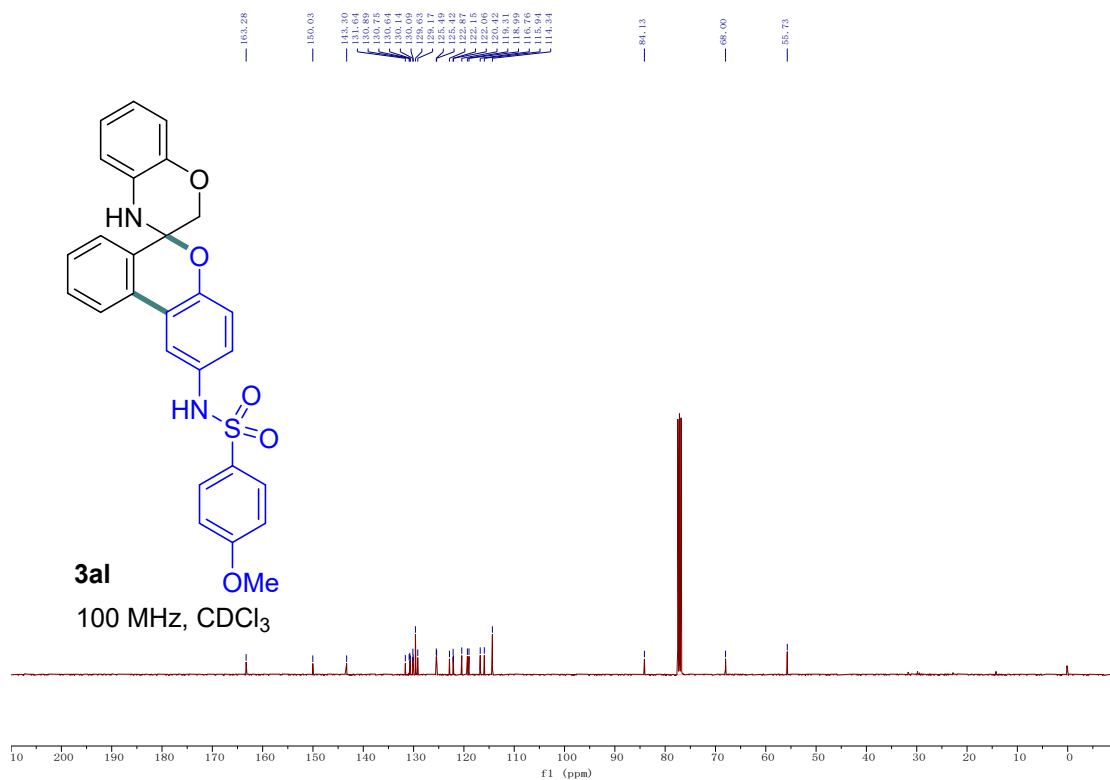



# <sup>1</sup>H and <sup>13</sup>C NMR Spectra of 4aa

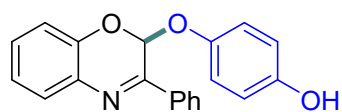

**4aa**  
400 MHz, CDCl<sub>3</sub>

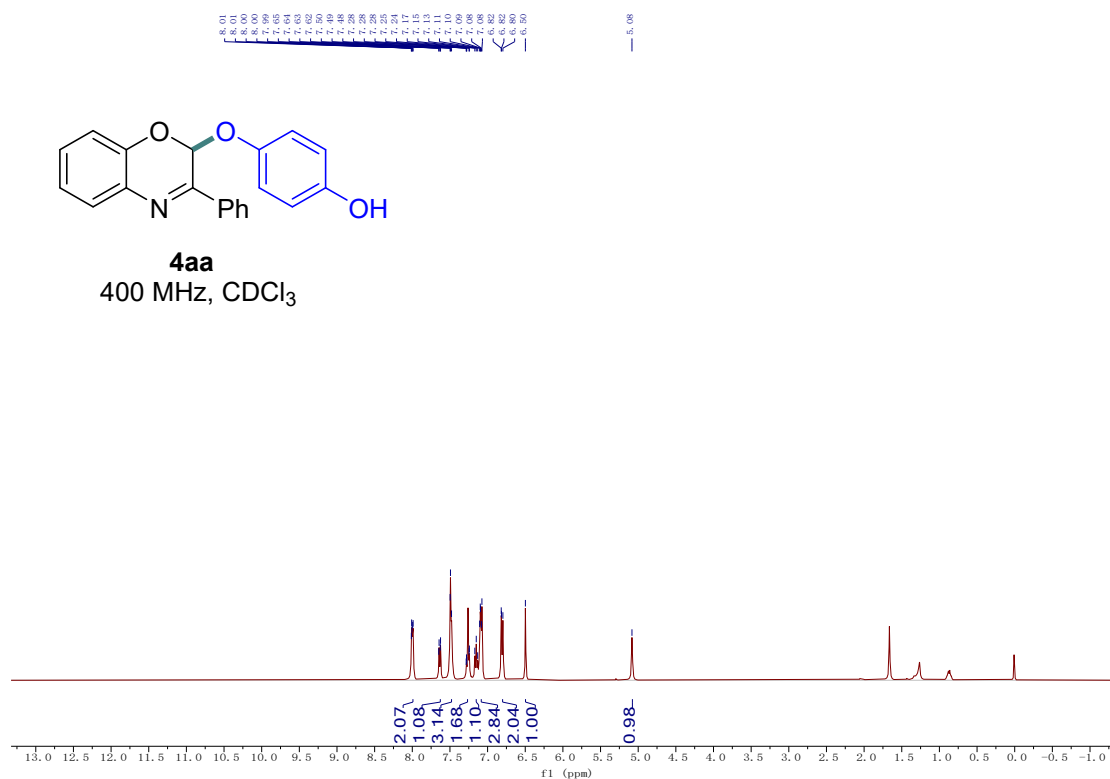

Supplement: d3ob01971c1.pdf [file d3ob01971c1.pdf]
